# Supplementary material for: Comparative Sex Chromosome Genomics in Snakes: Differentiation, Evolutionary Strata, and Lack of Global Dosage Compensation
Source: PLoS Biol. 2013 Aug 27;11(8):e1001643. doi: 10.1371/journal.pbio.1001643 (PMC3754893; doi:10.1371/journal.pbio.1001643)
Supplement: Dataset S2 — Molecular evolution of Z-linked genes in snakes. Ka, Ks, and Ka/Ks values for boa- Anolis , pygmy rattlesnake- Anolis and garter snake- Anolis comparisons are given for each gene. All divergence values were obtained with the KaKs_calculator (http://code.google.com/p/kaks-calculator/) with the Nei-Gojobori model. (XLSX) [file pbio.1001643.s002.xlsx]

## Sheet: Sheet1
Table S6: Ka, Ks and Ka/Ks values for boa-Anolis, pygmy rattlesnake-Anolis and garter snake-Anolis comparisons. All divergence values were obtained with the KaKs_calculator (http://code.google.com/p/kaks-calculator/) with the Nei-Gojobori model.
gene	(Boa-Anolis)Ka	(Boa-Anolis)Ks	(Boa-Anolis)KaKs	p-value (Boa-Anolis)	(Pygmy-Anolis)Ka	(Pygmy-Anolis)Ks	(Pygmy-Anolis)KaKs	P-value (Pygmy-Anolis)	(Garter-Anolis)Ka	(Garter-Anolis)Ks	(Garter-Anolis)KaKs	P-value (Garter-Anolis)	chrom	start	end	mid	length
ENSACAG00000000004	0.128225	NA	NA	1.07877e-18	0.187916	2.79407	0.0672553	1.28416e-13	0.16642	NA	NA	1.44446e-15	Un2048	916	3083	1999.5	219
ENSACAG00000000006	0.173788	0.692471	0.250968	5.29395e-19	0.192396	0.752825	0.255565	3.58312e-19	0.184242	0.778727	0.236593	1.08347e-20	5	56403077	56436209	56419643	984
ENSACAG00000000009	0.0103653	1.45744	0.00711201	3.99357e-63	0.010349	1.67021	0.00619622	7.08691e-69	0.0103682	1.50719	0.00687917	4.35047e-64	Un0400	383034	431141	407088	618
ENSACAG00000000011	0.0484028	1.38803	0.0348716	5.35135e-35	0.113832	1.21385	0.0937778	4.92143e-24	0.0417717	1.75851	0.023754	2.7659e-42	Un1448	15191	28057	21624	441
ENSACAG00000000013	NA	0.351353	0	NA	0.00454198	0.549698	0.00826268	1.87762e-17	0.0113909	0.537424	0.0211953	1.87494e-16	6	32354697	32363489	32359093	285
ENSACAG00000000024	0.00789066	0.645578	0.0122226	5.96826e-44	0.0158773	0.771534	0.0205789	3.9591e-46	0.0138836	0.841708	0.0164946	2.89094e-50	5	12377218	12454539	12415900	669
ENSACAG00000000026	0.0299993	0.62869	0.0477172	2.64871e-22	0.0270056	0.675777	0.0399622	1.87429e-24	0.0270225	0.780221	0.0346344	1.47525e-27	5	12351837	12360427	12356132	444
ENSACAG00000000028	0.181931	0.567779	0.320425	1.49134e-19	0.201083	0.632707	0.317814	7.07806e-21	0.214882	0.670246	0.320602	2.48218e-21	5	12207661	12335637	12271649	1395
ENSACAG00000000033	0.100302	1.44257	0.0695304	1.24775e-40	0.195543	1.46544	0.133436	7.77964e-28	0.131818	1.81793	0.0725098	4.7208e-41	5	11937990	11950984	11944487	690
ENSACAG00000000034	0.0231731	0.710782	0.0326022	3.69513e-184	0.0273387	0.793724	0.0344436	3.74306e-194	0.0593426	0.819069	0.0724513	5.60267e-154	5	11886208	11931909	11909100	3210
ENSACAG00000000037	0.0779537	0.691143	0.112789	5.0816e-30	0.0789483	0.829283	0.0952007	1.96307e-35	0.0945538	0.897427	0.105361	2.17966e-35	5	11553161	11614493	11583827	801
ENSACAG00000000040	0.310196	1.23971	0.250217	7.11063e-05	0.315527	1.49355	0.211261	1.27696e-05	0.295322	0.959704	0.307722	0.000541947	5	11225133	11226225	11225679	171
ENSACAG00000000042	0.0147211	0.722746	0.0203683	3.97078e-10	0.0246889	0.639007	0.0386364	1.7544e-08	0.0247076	0.816756	0.0302508	4.24834e-10	1	66306675	66314838	66310800	132
ENSACAG00000000043	0.101255	0.440739	0.229738	1.5616e-15	0.123561	0.544408	0.226963	1.5941e-17	0.117721	0.512922	0.22951	2.02068e-16	1	66347533	66434365	66390949	927
ENSACAG00000000046	0.0840644	0.43409	0.193657	4.82537e-08	0.0905115	0.590109	0.153381	4.21431e-11	0.0984568	0.648355	0.151856	4.68474e-12	1	66727746	66748524	66738135	420
ENSACAG00000000047	0.0964605	0.594532	0.162246	4.46504e-24	0.106377	0.653195	0.162856	1.16874e-24	0.10606	0.630522	0.16821	8.82415e-24	1	66773689	66774871	66774280	855
ENSACAG00000000054	0.0826645	0.669291	0.123511	1.97597e-18	0.0859854	0.621076	0.138446	1.9686e-16	0.086745	0.630097	0.137669	3.98494e-17	1	67299793	67308681	67304237	507
ENSACAG00000000055	0.0177958	0.266478	0.0667815	2.94149e-26	0.0154072	0.282305	0.0545763	2.5947e-29	0.0165988	0.305245	0.0543785	3.12389e-31	1	67487357	67503739	67495548	1116
ENSACAG00000000057	NA	0.756087	0	NA	NA	0.545095	0	NA	NA	0.756087	0	NA	1	67637604	67651783	67644700	90
ENSACAG00000000060	0.0212427	0.528344	0.0402062	2.05604e-40	0.0239542	0.528572	0.0453186	5.85059e-39	0.0202865	0.553874	0.0366265	8.88474e-42	1	67753858	67772635	67763200	891
ENSACAG00000000061	0.0511621	0.523219	0.0977833	1.20694e-14	0.0460497	0.738106	0.062389	1.22473e-20	0.0494906	0.652339	0.0758664	6.18853e-18	1	67804301	67811950	67808100	405
ENSACAG00000000062	0.0262323	0.430663	0.0609115	1.51221e-13	0.0185717	0.48154	0.0385672	2.13767e-16	0.0261687	0.573516	0.0456286	9.43242e-18	1	67814851	67847482	67831200	357
ENSACAG00000000063	0.22913	0.392862	0.583232	0.21023	0.187972	0.445213	0.422206	0.0672944	0.217494	0.441708	0.492394	0.12942	1	67851571	67864069	67857820	120
ENSACAG00000000064	0.208887	0.582672	0.358498	1.53651e-18	0.219154	0.711466	0.308031	5.86573e-25	0.226671	0.756995	0.299435	3.3953e-26	1	67877567	67885623	67881595	1665
ENSACAG00000000065	0.0445479	0.808054	0.0551298	2.15932e-39	0.0516257	0.893422	0.0577842	4.54876e-40	0.0474454	0.974282	0.0486978	5.25485e-44	1	67965777	67971237	67968507	690
ENSACAG00000000066	0.0409441	0.76057	0.0538335	8.79833e-55	0.0520999	0.868547	0.0599852	1.26296e-56	0.0521063	0.8419	0.0618913	4.04887e-55	1	67988390	68019929	68004200	1005
ENSACAG00000000067	0.0391443	0.495494	0.0790006	2.64098e-29	0.0446965	0.619473	0.0721525	1.38822e-35	0.0399388	0.65054	0.0613933	4.60519e-39	1	68040069	68072846	68056500	843
ENSACAG00000000071	0.0792118	0.595425	0.133034	1.8311e-13	0.0958583	0.777789	0.123245	1.78559e-15	0.1191	1.01845	0.116943	9.55173e-18	1	68530709	68540182	68535400	393
ENSACAG00000000073	0.032669	0.672598	0.0485713	1.37958e-39	0.0465655	0.666869	0.0698271	7.49318e-35	0.0412706	0.749433	0.0550691	1.87157e-40	1	68593584	68628666	68611125	780
ENSACAG00000000074	0.0152778	0.401895	0.0380144	1.09223e-21	0.0241313	0.612926	0.0393706	7.93502e-29	0.0364915	0.485243	0.0752026	9.24063e-21	1	68654303	68681945	68668124	585
ENSACAG00000000077	0.0880001	0.611999	0.143791	1.25893e-12	0.0883336	0.698796	0.126408	1.16565e-14	0.104711	0.651902	0.160624	3.35667e-12	1	68785843	68866731	68826287	375
ENSACAG00000000080	0.100016	1.04482	0.0957256	1.23055e-40	0.133366	0.945436	0.141063	8.72498e-31	0.103838	1.09849	0.0945279	1.12827e-41	Un0171	942890	958772	950831	819
ENSACAG00000000083	NA	0.731705	0	NA	NA	0.998444	0	NA	NA	0.902598	0	NA	Un0482	245055	248381	246718	279
ENSACAG00000000085	0.0228938	1.01979	0.0224496	4.44119e-29	0.28743	1.4068	0.204314	1.29276e-11	0.0543757	1.25134	0.043454	6.75971e-27	Un0200	783739	794319	789029	354
ENSACAG00000000086	0.140106	1.12435	0.124611	1.74216e-27	0.16549	1.529	0.108234	3.87568e-31	0.169706	1.14974	0.147604	4.80087e-24	Un0200	800685	801561	801123	663
ENSACAG00000000098	NA	0.208869	0	NA	0.00268817	0.234362	0.0114702	4.47287e-14	0.0889203	0.358831	0.247805	3.60797e-07	Un0040	2018226	2041545	2029890	477
ENSACAG00000000099	0.0389543	0.745566	0.0522479	7.20948e-34	0.0433538	0.678711	0.0638767	5.28891e-30	0.040974	0.775354	0.0528456	2.16231e-34	Un0215	235533	236439	235986	606
ENSACAG00000000100	0.0328768	0.750628	0.043799	3.52228e-35	0.0402314	0.727174	0.0553257	5.39458e-33	0.0370396	0.651819	0.0568249	5.77386e-30	Un0215	107397	138517	122957	642
ENSACAG00000000103	0.103792	0.787709	0.131765	9.82993e-15	0.0989603	1.30312	0.0759409	3.09357e-24	0.111617	1.21374	0.0919616	3.90245e-21	Un0130	1122999	1125455	1124227	408
ENSACAG00000000107	0.178034	0.866563	0.205448	0.00140524	0.177928	1.27404	0.139657	3.86603e-05	0.228687	1.54747	0.147781	0.000151141	Un0130	1098261	1108101	1103181	93
ENSACAG00000000108	0.0549162	0.605454	0.0907024	1.42568e-68	0.0644241	0.856634	0.0752061	1.54372e-89	0.0618414	0.754262	0.0819893	1.7952e-81	Un0130	1084205	1095216	1089710	1818
ENSACAG00000000109	0.0354291	1.00827	0.0351387	3.75686e-55	0.0448754	1.13132	0.0396664	1.62248e-56	0.0339189	1.24373	0.0272719	4.32878e-64	Un0130	1075414	1079994	1077704	789
ENSACAG00000000115	0.119617	0.909245	0.131556	3.62118e-36	0.134536	0.972721	0.138309	4.33167e-36	0.136116	1.00818	0.135012	4.19509e-37	4	104460291	104461710	104461000	963
ENSACAG00000000119	0.0275496	0.545395	0.050513	4.63654e-12	0.0275011	0.632952	0.0434489	1.0471e-13	0.0394491	0.635791	0.0620472	3.89785e-13	4	104451019	104456329	104453674	276
ENSACAG00000000120	0.00905629	0.565059	0.0160272	1.23652e-24	0.0198092	0.638764	0.0310117	6.29971e-25	0.015163	0.563549	0.0269063	8.87364e-23	Un0130	835078	841035	838056	429
ENSACAG00000000124	0.121568	0.824761	0.147398	5.18059e-12	0.116519	0.835544	0.139453	1.86032e-12	0.113952	0.959034	0.11882	7.54923e-14	4	104433384	104447512	104440448	318
ENSACAG00000000126	0.200928	0.909865	0.220833	2.2366e-09	0.173164	1.01955	0.169843	5.6178e-12	0.172156	0.680271	0.25307	1.73004e-07	Un2209	5012	10053	7532.5	306
ENSACAG00000000128	0.206443	0.717027	0.287915	9.90565e-14	0.215133	0.724479	0.296949	3.07083e-13	0.229949	0.915852	0.251077	2.47469e-17	1	148055038	148064573	148060000	765
ENSACAG00000000130	0.0722452	0.630068	0.114663	5.14576e-42	0.103373	0.739709	0.139748	4.00331e-41	0.0717481	0.874523	0.0820425	5.25045e-60	4	104392747	104405193	104398970	1281
ENSACAG00000000136	0.00838328	0.785748	0.0106692	1.25043e-101	0.00937293	0.967148	0.00969131	7.4129e-116	0.0618271	0.902764	0.0684864	2.14706e-72	Un0130	812920	823756	818338	1341
ENSACAG00000000139	0.200827	1.4274	0.140694	9.9933e-51	0.229735	1.73959	0.132062	1.77685e-51	0.239428	2.19743	0.108958	5.54451e-57	4	16274635	16276087	16275361	1338
ENSACAG00000000140	0.0208436	0.577029	0.0361223	1.12235e-28	0.0172825	0.704863	0.0245189	5.08732e-36	0.01729	0.857397	0.0201657	8.68776e-42	4	16041506	16127709	16084600	567
ENSACAG00000000141	0.086151	0.943989	0.0912628	4.57378e-20	0.0808369	1.02817	0.0786221	1.09386e-22	0.101459	0.95919	0.105776	3.65776e-19	4	139233221	139278542	139256000	423
ENSACAG00000000144	0.0100556	0.506157	0.0198665	1.70121e-20	0.013434	0.65157	0.0206179	3.20617e-24	1.1826	NA	NA	0.0011569	4	15680245	15796048	15738100	390
ENSACAG00000000146	0.0958352	0.882258	0.108625	3.71825e-31	0.108745	1.08365	0.100351	5.11347e-35	0.109785	0.863817	0.127093	1.52797e-28	4	104277263	104301524	104289000	699
ENSACAG00000000150	0.0414058	0.384256	0.107756	7.42745e-22	0.0438675	0.395358	0.110956	1.61762e-21	0.0447046	0.417106	0.107178	2.85461e-23	4	139314815	139327090	139321000	846
ENSACAG00000000152	0.127365	0.804092	0.158396	9.41783e-14	0.136121	0.762508	0.178518	6.57614e-12	0.148697	0.818961	0.181568	1.87917e-12	1	148191617	148244373	148217995	417
ENSACAG00000000153	0.0870556	0.839909	0.103649	1.74194e-79	0.0823527	0.896751	0.0918345	3.49291e-88	0.127621	1.05621	0.120829	4.32443e-79	4	139346117	139390760	139368000	1950
ENSACAG00000000154	0.0254634	0.421102	0.0604684	1.23852e-16	0.0312517	0.508343	0.0614776	7.56053e-19	0.0226156	0.452826	0.0499432	1.5233e-18	4	38378034	38435497	38406800	465
ENSACAG00000000155	0.0501274	0.865957	0.0578867	1.76664e-45	0.0491937	1.18638	0.0414655	3.74473e-57	0.0596905	1.22501	0.0487264	3.35167e-55	Un0130	798978	806701	802840	813
ENSACAG00000000156	0.0387829	0.74634	0.0519642	4.13909e-43	0.0415225	0.800425	0.0518756	1.08437e-45	0.0382458	0.810912	0.0471639	1.66072e-47	2	134471649	134514132	134493000	819
ENSACAG00000000159	0.0498087	0.718077	0.0693641	5.02399e-59	0.058058	0.696255	0.0833862	1.17166e-53	0.0632065	0.680132	0.0929328	3.09501e-50	4	38289965	38300304	38295100	1326
ENSACAG00000000163	0.104826	0.891986	0.11752	6.42561e-10	0.115466	0.722679	0.159775	5.18669e-08	0.137716	1.05891	0.130055	3.15015e-10	Un0130	721341	727981	724661	207
ENSACAG00000000164	0.0073729	0.363835	0.0202644	8.50763e-55	0.0402217	0.447146	0.089952	1.2066e-43	0.0073755	0.448334	0.0164509	1.65888e-66	Un0040	1842228	1881807	1862020	1413
ENSACAG00000000168	0.0247782	0.639995	0.0387163	3.41106e-210	0.0312795	0.706642	0.044265	7.33832e-216	0.0552111	0.785583	0.0702804	6.99565e-195	4	104183479	104272080	104228000	4134
ENSACAG00000000171	0.121057	0.745011	0.16249	2.57725e-11	0.142062	0.940518	0.151047	8.85273e-13	0.129211	0.800393	0.161434	1.32269e-11	Un0040	1804501	1807614	1806060	348
ENSACAG00000000173	0.113584	1.06828	0.106325	6.52726e-49	0.13878	1.02441	0.135473	1.81313e-41	0.232387	NA	NA	9.90634e-72	Un0130	208666	218757	213712	1059
ENSACAG00000000176	0.248868	0.66201	0.375929	2.13884e-12	0.265894	0.648966	0.409719	8.40063e-11	0.259729	0.775332	0.334991	1.58513e-15	Un0040	1741664	1789579	1765620	1137
ENSACAG00000000177	0.00561754	0.814333	0.00689833	1.76714e-35	0.0056136	0.848961	0.00661232	1.89163e-36	0.135017	2.21153	0.0610514	1.72059e-29	Un0214	313263	320844	317054	456
ENSACAG00000000178	0.0235661	0.956568	0.0246361	4.85051e-25	0.0235271	1.26098	0.0186578	1.48981e-29	0.019247	1.38562	0.0138906	4.19154e-32	4	103484560	103520646	103502603	312
ENSACAG00000000179	0.194751	0.982406	0.198239	4.17055e-18	0.212052	0.831088	0.255149	1.12942e-13	0.218597	0.90221	0.24229	2.11255e-14	3	105981309	105988812	105985000	630
ENSACAG00000000180	0.102893	1.04812	0.098169	6.4292e-38	0.113777	1.65316	0.0688242	4.67304e-49	0.12167	1.51445	0.0803395	4.10519e-46	Un0040	1714678	1715566	1715122	762
ENSACAG00000000181	0.0944895	0.980013	0.0964165	2.06633e-28	0.0733497	1.23891	0.0592049	1.51346e-38	0.0754477	1.15402	0.0653783	3.75326e-36	Un0214	326695	331774	329234	600
ENSACAG00000000182	0.0277462	0.734283	0.0377868	2.28896e-20	0.0357483	0.783046	0.0456528	5.21334e-20	0.0236742	0.741929	0.031909	3.16505e-21	Un0040	1400417	1431269	1415843	336
ENSACAG00000000185	0.139899	0.869129	0.160965	1.29542e-24	0.161906	1.08391	0.149373	5.72839e-28	0.171422	0.873304	0.196291	1.90456e-20	Un0130	196437	197813	197125	741
ENSACAG00000000186	0.114467	0.969234	0.118101	9.96271e-51	0.125454	1.08242	0.115902	2.70341e-53	0.120094	0.981031	0.122416	1.78225e-49	Un0130	192420	195930	194175	1254
ENSACAG00000000188	0.0127403	0.592523	0.0215017	2.24429e-60	0.0127321	0.759645	0.0167605	8.74386e-74	0.0115744	0.6595	0.0175503	5.19104e-67	3	105990515	106009875	106000195	1110
ENSACAG00000000190	0.0300775	1.60855	0.0186984	7.79275e-15	0.0508208	2.35084	0.0216182	4.20567e-15	0.030064	2.37144	0.0126775	1.03687e-16	Un3723	549	6297	3423	138
ENSACAG00000000191	0.115693	1.26007	0.0918147	7.97645e-14	0.116831	1.25152	0.0933516	9.60487e-13	0.120701	1.8586	0.0649419	2.17015e-16	Un0452	420	5565	2992.5	213
ENSACAG00000000192	0.12291	1.85796	0.0661531	1.1041e-23	0.129231	2.26093	0.0571583	4.29031e-24	0.118662	1.81374	0.0654241	6.70481e-24	Un0452	9906	15680	12793	342
ENSACAG00000000193	0.0977895	1.71058	0.0571674	1.21437e-21	0.10721	1.324	0.0809745	1.04273e-17	0.105181	1.47857	0.0711369	6.6858e-20	Un0214	336252	337626	336939	291
ENSACAG00000000199	0.0515683	2.26428	0.0227747	1.25548e-49	0.0543736	1.75874	0.0309162	4.15027e-45	0.088407	NA	NA	2.93663e-51	Un0452	17702	26185	21943.5	555
ENSACAG00000000200	0.123555	1.43975	0.085817	2.98836e-50	0.134736	1.77117	0.0760719	7.73089e-55	0.159689	1.336	0.119527	2.32954e-41	Un0130	177622	182891	180256	906
ENSACAG00000000201	0.0439898	0.760608	0.057835	2.32964e-35	0.0525401	0.95687	0.0549083	2.04475e-40	0.061012	0.90045	0.0677573	3.03319e-36	4	38225662	38260674	38243168	657
ENSACAG00000000202	0.00689622	0.572625	0.0120432	4.78648e-44	0.00863338	0.584442	0.014772	1.29504e-45	0.0077586	0.580675	0.0133613	6.39142e-45	Un0040	1117282	1148150	1132716	750
ENSACAG00000000203	0.0146703	0.436139	0.0336368	0.000111256	0.242931	1.19598	0.203123	0.000721068	0.029558	0.899497	0.0328606	5.13865e-07	4	15495900	15611749	15553800	90
ENSACAG00000000204	0.065921	1.15327	0.05716	2.55078e-11	0.0581315	0.832351	0.0698402	1.43476e-09	0.0678022	0.989329	0.0685334	2.27389e-10	Un0058	364169	402454	383312	153
ENSACAG00000000205	0.252985	1.0315	0.24526	9.63864e-33	0.262306	1.22174	0.214699	6.59083e-38	0.265133	1.36271	0.194563	6.22473e-42	Un0130	162557	174323	168440	1479
ENSACAG00000000206	0.0229058	0.467619	0.048984	1.67799e-65	0.0237593	0.509032	0.0466754	9.65323e-71	0.0221197	0.519842	0.0425509	1.2783e-73	Un0058	434818	544210	489514	1647
ENSACAG00000000207	0.115022	0.654633	0.175704	5.6653e-17	0.136538	0.652097	0.209383	1.08011e-14	0.143862	0.651118	0.220947	6.0845e-14	Un0040	968293	992145	980219	639
ENSACAG00000000210	0.018805	0.649984	0.0289314	3.3594e-74	0.0202392	0.70289	0.0287942	4.88165e-77	0.0239933	0.704362	0.0340639	1.53633e-75	Un0058	676183	689170	682676	1341
ENSACAG00000000214	0.02205	0.476923	0.0462338	2.02388e-52	0.0266107	0.625202	0.0425634	1.74798e-63	0.0346186	0.622575	0.0556055	5.29531e-58	Un0040	819611	922916	871264	1293
ENSACAG00000000215	0.0361378	0.686122	0.0526696	8.3422e-12	0.0489825	0.656616	0.0745985	1.98936e-10	0.0425816	0.617675	0.0689384	2.53616e-10	Un0130	151435	158084	154760	219
ENSACAG00000000216	0.134595	1.03881	0.129566	1.69514e-30	0.200983	1.02213	0.196631	8.7875e-22	0.223508	1.03327	0.216312	1.07835e-19	Un0452	157960	194382	176171	759
ENSACAG00000000222	0.0358308	1.08562	0.033005	5.50268e-14	0.0738318	0.728072	0.101407	3.54041e-08	0.0655527	1.01144	0.0648112	4.29779e-11	Un0506	55763	89568	72665.5	183
ENSACAG00000000225	0.127449	1.06853	0.119275	1.29119e-37	0.128099	1.28625	0.0995914	3.39111e-43	0.143226	1.27991	0.111903	1.43972e-40	Un0214	429417	433925	431671	864
ENSACAG00000000226	0.0537977	0.466556	0.115308	1.64537e-05	0.0771302	0.612438	0.12594	1.40345e-06	0.0539454	0.920191	0.0586241	2.25935e-11	Un0493	1148	6065	3606.5	153
ENSACAG00000000229	0.0184149	0.957459	0.0192331	4.24064e-17	0.0184539	0.810916	0.0227569	2.64596e-15	0.177469	1.43593	0.123592	2.96342e-10	Un0423	89103	96146	92624.5	213
ENSACAG00000000230	0.117002	0.724602	0.161471	8.57191e-208	0.115213	0.711924	0.161834	1.58831e-204	0.111338	0.718499	0.15496	1.26948e-212	Un0059	55291	252640	153966	7362
ENSACAG00000000231	0.0268239	0.646852	0.0414683	1.36018e-13	0.0207898	0.788768	0.0263573	1.08374e-16	0.020806	0.642818	0.0323669	2.56596e-14	Un2020	1539	16582	9060.5	225
ENSACAG00000000233	0.15156	0.867004	0.174809	6.12012e-40	0.174693	0.916303	0.19065	2.64377e-37	0.159098	0.894024	0.177957	1.62164e-39	Un0214	451845	459830	455838	1362
ENSACAG00000000234	0.0242833	0.781377	0.0310775	3.36486e-70	0.0351513	0.900712	0.0390261	7.58807e-73	0.0318086	0.830822	0.0382857	5.27611e-70	Un0175	82339	92679	87509	1170
ENSACAG00000000237	0.0693971	0.694911	0.0998646	1.27132e-49	0.0709884	0.859606	0.0825824	5.98418e-60	0.0758014	0.89321	0.084864	2.0051e-60	Un0175	395143	451859	423501	1242
ENSACAG00000000240	0.0222034	0.749841	0.0296108	5.54514e-87	0.0304326	0.913834	0.0333021	5.34671e-93	0.029346	0.854583	0.0343396	7.90528e-89	Un0363	294143	296501	295322	1341
ENSACAG00000000241	0.168097	0.889129	0.189058	2.02929e-12	0.189928	0.830931	0.228573	3.39709e-10	0.208636	0.679692	0.306957	1.15747e-06	Un0214	513038	519545	516292	375
ENSACAG00000000242	0.00820509	1.47976	0.00554489	1.56333e-153	0.0610918	1.54517	0.0395374	6.55526e-110	0.0106105	1.22873	0.00863537	1.38068e-135	Un0423	137453	247550	192502	1380
ENSACAG00000000245	0.192672	0.726935	0.265047	1.97232e-23	0.193196	0.947312	0.203941	2.80926e-34	0.198602	0.842852	0.235631	1.43339e-28	Un0009	1126895	1146142	1136520	1221
ENSACAG00000000246	0.148741	1.2605	0.118002	7.15767e-11	0.156294	2.06204	0.0757957	4.63042e-14	0.150271	1.2155	0.123629	1.0015e-10	Un1846	11770	20004	15887	228
ENSACAG00000000247	0.016656	2.32205	0.00717298	2.37719e-52	0.0313598	1.14755	0.0273276	1.14364e-35	0.0251098	1.64539	0.0152607	2.41197e-44	Un0363	359662	370542	365102	462
ENSACAG00000000248	0.335292	1.93473	0.173302	6.04883e-18	0.436428	2.20024	0.198355	4.82713e-15	0.335444	3.18837	0.105209	6.46493e-22	Un0461	125413	127062	126238	534
ENSACAG00000000249	0.093281	0.726504	0.128397	7.14675e-33	0.100031	0.827857	0.120832	3.75013e-38	0.0956363	0.687726	0.139062	4.49587e-32	Un0371	341025	342476	341750	972
ENSACAG00000000251	0.067269	NA	NA	1.36407e-33	0.0499005	NA	NA	2.67844e-36	0.0499822	NA	NA	5.52858e-40	Un0461	72884	73238	73061	279
ENSACAG00000000252	0.0167775	0.637366	0.0263232	4.15962e-46	0.163723	NA	NA	2.17793e-95	0.0362969	0.700835	0.0517909	6.89429e-42	Un0125	576365	640215	608290	840
ENSACAG00000000253	0.243557	0.801379	0.303923	9.52141e-13	0.212283	0.93189	0.227798	3.74704e-18	0.300564	1.16916	0.257077	1.49432e-16	Un0058	948616	972253	960434	762
ENSACAG00000000255	0.0221162	1.10967	0.0199304	4.97987e-17	0.0221369	0.646497	0.0342413	1.2616e-11	0.041865	1.08642	0.0385348	2.2931e-15	Un0461	22988	52009	37498.5	186
ENSACAG00000000256	0.0618383	0.792992	0.077981	9.66929e-73	0.0731502	0.919043	0.0795939	1.47576e-77	0.0766131	0.848376	0.0903056	5.08146e-70	Un0009	1073419	1113523	1093471	1545
ENSACAG00000000260	0.0263992	0.648139	0.0407307	1.9427e-07	0.0174421	0.88675	0.0196697	5.73824e-10	0.0263992	0.748137	0.0352865	2.7313e-08	Un0125	161016	177384	169200	141
ENSACAG00000000262	0.0820477	1.78538	0.0459554	6.20399e-90	0.0915984	3.35327	0.0273161	3.35153e-101	0.0905453	2.87014	0.0315473	6.48596e-100	Un0371	223941	225195	224568	1206
ENSACAG00000000263	0.0865364	0.762932	0.113426	3.1134e-18	0.0977994	0.726568	0.134605	1.18932e-15	0.092619	1.0929	0.0847464	3.54864e-24	1	147005363	147008531	147006947	450
ENSACAG00000000264	0.165388	0.545298	0.303298	6.4768e-08	0.177722	0.609037	0.291809	1.39044e-08	0.167072	0.596627	0.280028	7.20948e-09	3	106069379	106077417	106073398	486
ENSACAG00000000265	0.0649792	0.965793	0.0672806	7.11608e-22	0.0702884	0.964485	0.0728766	1.94567e-20	0.0759181	0.895288	0.0847973	3.69476e-19	3	106081656	106106351	106094000	381
ENSACAG00000000269	0.122065	0.921498	0.132464	1.36877e-46	0.169758	1.09862	0.154519	1.62398e-43	0.140795	1.14853	0.122586	2.13674e-52	Un0058	1052884	1081163	1067020	1179
ENSACAG00000000274	0.0192052	0.634678	0.0302597	8.04981e-29	0.0265429	0.795114	0.0333825	2.57472e-32	0.028445	0.673682	0.0422231	7.64521e-29	3	106161972	106193059	106178000	534
ENSACAG00000000275	0.127572	0.656246	0.194396	3.85567e-11	0.15343	0.809514	0.189533	6.14375e-13	0.130369	0.664511	0.196187	1.20221e-11	Un0452	271846	299379	285612	408
ENSACAG00000000276	0.210248	1.49959	0.140204	5.02294e-18	0.178667	1.40007	0.127613	1.74538e-19	0.178903	1.02466	0.174597	9.75612e-15	Un1182	7397	12860	10128.5	441
ENSACAG00000000278	0.084704	NA	NA	0.00266321	0.154136	0.861942	0.178824	0.0379021	0.932146	NA	NA	0.000488111	4	60667129	60684391	60675760	30
ENSACAG00000000286	0.027186	1.12972	0.0240645	8.57837e-34	0.110005	1.61276	0.0682089	1.11206e-27	0.0306547	1.22647	0.0249942	1.12722e-34	Un3048	641	6912	3776.5	399
ENSACAG00000000288	0.163412	2.08141	0.0785101	7.3449e-14	0.179604	0.934105	0.192274	1.61914e-07	1.34859	0.881519	1.52985	0.187827	Un0090	1639514	1640069	1639790	210
ENSACAG00000000289	0.00448609	0.380134	0.0118013	1.25443e-13	NA	0.403454	0	NA	0.0135766	0.423922	0.0320261	4.20066e-13	4	38175366	38194408	38184887	294
ENSACAG00000000291	0.0644996	0.59481	0.108437	5.02783e-35	0.185235	0.738706	0.250756	2.28305e-20	0.0690936	0.74588	0.0926337	4.86054e-43	Un0020	4030	19420	11725	951
ENSACAG00000000294	0.0210156	1.07128	0.0196173	4.87002e-21	0.0324694	1.62848	0.0199385	5.34566e-24	0.0351895	1.15486	0.0304707	6.52569e-19	Un0452	314157	325947	320052	234
ENSACAG00000000295	0.0231682	1.19212	0.0194345	3.77919e-27	0.0192773	1.25559	0.0153532	7.42033e-29	0.0231961	1.25389	0.0184994	5.45962e-28	Un0214	654524	670157	662340	330
ENSACAG00000000296	0.209225	1.22435	0.170887	6.77137e-21	0.275881	1.54745	0.178281	2.90263e-20	0.233038	1.40361	0.166027	3.45337e-21	Un0009	968642	984698	976670	651
ENSACAG00000000298	0.292205	0.52111	0.560735	0.00197354	0.284821	0.576	0.49448	0.000111579	0.30911	0.569512	0.542763	0.000760781	1	235812495	235821635	235817065	648
ENSACAG00000000300	0.111583	0.451262	0.24727	1.48395e-06	0.123004	0.404319	0.304226	5.98511e-05	0.171278	0.494408	0.346431	0.000108768	1	235769639	235782580	235776000	330
ENSACAG00000000302	0.0242095	0.492305	0.0491757	2.06791e-29	0.0251664	0.578528	0.0435008	4.03745e-33	0.0251308	0.701651	0.0358167	2.8692e-39	4	60344847	60353029	60348938	684
ENSACAG00000000303	0.159329	1.17606	0.135477	1.0787e-56	0.166259	1.69415	0.0981371	1.30763e-71	0.205518	1.47252	0.139569	3.19503e-55	Un1182	15585	37965	26775	1392
ENSACAG00000000305	0.0454778	0.352204	0.129123	5.874e-08	0.0630764	0.409527	0.154023	4.90327e-08	0.0500212	0.432888	0.115552	1.13059e-09	4	60307092	60321404	60314248	324
ENSACAG00000000306	0.114075	0.818264	0.139411	3.63878e-33	0.128466	0.947989	0.135514	2.21893e-36	0.12094	1.03793	0.11652	2.38111e-41	4	60242078	60251217	60246600	999
ENSACAG00000000307	0.0299154	1.43399	0.0208617	6.46221e-46	0.0352864	1.21121	0.0291332	1.86627e-40	0.0312936	1.64899	0.0189775	9.85899e-48	Un6188	417	4355	2386	504
ENSACAG00000000308	0.109843	0.528145	0.207979	2.90887e-06	0.315728	0.853821	0.369783	0.000415688	0.0973696	0.688753	0.141371	2.45534e-09	Un0009	882597	907003	894800	249
ENSACAG00000000317	0.103269	1.09253	0.0945227	4.21296e-11	0.0910065	1.14575	0.0794297	1.46009e-11	0.129246	2.2459	0.0575475	8.30266e-15	Un0058	1088079	1089529	1088804	186
ENSACAG00000000318	0.114193	1.18169	0.0966348	3.12873e-74	0.12486	1.53309	0.0814435	1.51133e-85	0.133298	1.79674	0.0741889	7.27922e-90	Un0103	1612193	1623399	1617796	1563
ENSACAG00000000319	0.0787643	0.657688	0.119759	1.57553e-41	0.092114	0.753037	0.122323	1.6667e-43	0.0901298	0.741214	0.121598	9.1123e-44	Un0058	1116686	1125650	1121168	1164
ENSACAG00000000324	0.108652	0.671387	0.161833	2.16696e-10	0.114029	0.740236	0.154045	2.16755e-11	0.12094	0.922513	0.131099	3.12482e-13	4	60212588	60228075	60220300	333
ENSACAG00000000325	0.0378466	0.191931	0.197188	0.559433	0.057511	0.0898428	0.640129	0.559433	0.597025	0.779829	0.765584	0.640284	1	146726341	146764601	146745471	33
ENSACAG00000000329	0.223221	1.24178	0.179759	0.000110048	0.324971	2.88243	0.112742	6.87541e-05	0.225022	1.05404	0.213484	0.000304288	Un0506	296839	303894	300366	99
ENSACAG00000000332	0.0236965	0.91554	0.0258826	8.34861e-124	0.0272381	1.10261	0.0247033	1.56892e-135	0.0256511	1.02877	0.0249338	1.89966e-131	3	93916935	93919041	93917988	1725
ENSACAG00000000334	0.0205329	0.461017	0.0445382	3.26245e-27	0.025827	0.543035	0.0475605	3.18876e-29	0.0258363	0.527883	0.0489433	1.82702e-28	1	98527784	98529407	98528600	636
ENSACAG00000000338	0.0323277	0.368271	0.0877824	3.47372e-20	0.0323277	0.442659	0.0730306	8.78457e-25	0.0306109	0.49903	0.0613408	1.05259e-28	1	98480211	98495329	98487770	762
ENSACAG00000000339	0.05559	1.28909	0.0431234	2.79658e-17	0.0915813	NA	NA	3.97913e-21	0.0972067	1.53394	0.0633704	1.40825e-15	Un4194	3829	6716	5272.5	237
ENSACAG00000000340	0.00767189	0.517101	0.0148364	1.53287e-19	0.0193904	0.509845	0.038032	9.2719e-17	0.0115528	0.538229	0.0214644	3.13054e-19	Un1070	35937	49637	42787	345
ENSACAG00000000344	0.012395	0.612883	0.0202242	1.03789e-56	0.0149131	0.723342	0.020617	4.11793e-63	0.0186938	0.746905	0.0250283	3.4972e-62	Un0133	967848	993619	980734	1026
ENSACAG00000000352	0.175265	NA	NA	2.25982e-22	0.189061	6.17033	0.0306403	8.64632e-18	0.22561	NA	NA	1.65912e-18	Un4397	1	2156	1078.5	258
ENSACAG00000000355	0.0263676	0.788401	0.0334445	5.06324e-16	0.0322972	1.21562	0.0265684	2.31283e-20	0.0234867	1.2065	0.0194669	8.30174e-21	5	148207021	148214513	148210767	228
ENSACAG00000000361	0.206095	0.946916	0.217649	1.83035e-08	0.109768	0.755461	0.145299	1.1292e-10	0.119426	0.578295	0.206513	2.04484e-07	Un1361	1717	6485	4101	255
ENSACAG00000000365	0.177949	0.59204	0.30057	0.000636744	0.187716	0.648949	0.289262	0.00034695	0.208068	0.641124	0.324536	0.00113126	1	45463005	45463292	45463100	171
ENSACAG00000000366	0.153801	0.634049	0.242569	1.2269e-05	0.224549	1.24901	0.179782	4.37437e-08	0.246902	1.08309	0.22796	1.34081e-06	Un0040	405824	423001	414412	240
ENSACAG00000000367	0.0162338	0.394506	0.0411497	1.43564e-10	0.0272615	0.476266	0.0572401	3.95489e-11	0.0272359	0.395525	0.0688602	2.72088e-09	3	106240976	106244388	106242682	252
ENSACAG00000000369	0.0128532	0.695592	0.018478	3.15054e-22	0.0128267	0.912255	0.0140604	1.15342e-26	0.0215298	0.904508	0.0238028	8.59814e-23	2	41747801	41757040	41752400	306
ENSACAG00000000374	0.0910057	0.805899	0.112925	1.5238e-06	0.0637198	0.938311	0.0679091	4.66907e-07	0.839195	1.42082	0.590642	0.260078	Un0973	13338	62717	38027.5	108
ENSACAG00000000375	0.0454479	0.880428	0.0516202	4.73387e-30	0.170417	1.07954	0.15786	2.22446e-18	0.0511731	1.22892	0.0416407	7.65512e-37	Un0443	350881	380574	365728	489
ENSACAG00000000376	0.179936	0.557597	0.322699	0.00231333	0.230997	0.632088	0.365451	0.00389396	0.254189	0.688044	0.369437	0.00493571	Un0157	724505	731909	728207	165
ENSACAG00000000380	0.147193	0.97549	0.150892	2.9758e-27	0.160646	1.22172	0.131492	3.34647e-32	0.145255	2.22934	0.065156	1.83775e-48	3	71192439	71223609	71208024	768
ENSACAG00000000382	0.0600603	1.27783	0.0470019	6.52904e-18	1.32798	NA	NA	0.00182953	0.0744795	NA	NA	3.97892e-25	5	73253065	73268045	73260555	246
ENSACAG00000000383	0.154789	1.08902	0.142136	8.29514e-30	0.171025	1.3218	0.129388	3.88897e-33	0.158935	1.20817	0.13155	3.97075e-32	Un0103	1566551	1600242	1583400	762
ENSACAG00000000385	0.0258268	NA	NA	7.49824e-74	0.277771	NA	NA	4.50075e-30	0.0228954	NA	NA	4.21969e-74	Un1626	13853	20122	16987.5	459
ENSACAG00000000386	0.1542	0.537454	0.286908	3.86372e-16	0.162235	0.671128	0.241734	3.19003e-21	0.180286	0.715755	0.251883	4.17443e-21	Un0038	1571712	1600153	1585930	1098
ENSACAG00000000388	0.0393793	1.1972	0.0328929	1.79077e-30	0.0684555	NA	NA	8.53874e-42	0.0637638	NA	NA	9.44407e-49	Un0157	1099027	1118225	1108626	411
ENSACAG00000000389	0.057702	1.07248	0.0538022	9.16936e-28	0.080994	1.08788	0.0744515	2.15825e-24	0.0675014	1.03049	0.0655039	2.45717e-25	Un0371	163943	167048	165496	417
ENSACAG00000000392	0.22752	0.83413	0.272764	2.11408e-05	0.211788	0.647635	0.327018	0.000384454	0.258934	0.612395	0.422822	0.00604963	Un0376	290478	321913	306196	204
ENSACAG00000000399	0.127954	1.06458	0.120191	4.16555e-14	0.133206	1.3482	0.0988029	4.66083e-16	0.145408	1.13625	0.127972	5.72418e-14	Un1977	9128	12919	11023.5	288
ENSACAG00000000402	0.0429286	0.73263	0.0585952	7.37184e-09	0.0429286	0.817374	0.0525202	1.28487e-09	0.0332827	0.578298	0.0575528	6.27801e-08	1	145258002	145258920	145258461	141
ENSACAG00000000403	0.00664988	0.858149	0.0077491	6.82982e-17	NA	1.09858	0	NA	0.0269922	0.9215	0.0292916	6.59076e-15	Un0193	540923	548964	544944	198
ENSACAG00000000410	0.133355	0.995803	0.133917	2.20388e-21	0.179484	2.07312	0.0865768	1.17065e-30	0.221064	1.94969	0.113384	2.52795e-25	5	73296825	73297548	73297200	549
ENSACAG00000000417	0.041586	1.26641	0.0328378	4.98068e-22	0.0522793	0.908138	0.0575675	3.30818e-15	0.0469363	0.744679	0.0630289	2.03846e-13	3	106372589	106405854	106389000	255
ENSACAG00000000419	0.00432707	0.673758	0.00642229	1.83279e-22	0.00866114	0.715318	0.0121081	3.30727e-22	0.00433114	0.85593	0.00506016	1.58053e-26	Un0666	166288	171184	168736	306
ENSACAG00000000420	0.0271754	0.662421	0.0410244	1.67211e-24	0.235686	0.838383	0.28112	4.44403e-09	0.0373837	0.642925	0.0581463	8.25026e-22	Un1023	2935	16263	9599	417
ENSACAG00000000423	0.0624417	1.1728	0.0532415	1.02766e-06	0.0621965	1.20946	0.051425	8.36222e-07	0.0623636	1.18415	0.0526653	9.63007e-07	Un0780	81051	106113	93582	87
ENSACAG00000000424	0.0179022	0.398853	0.0448841	1.71992e-11	0.0270793	0.473062	0.0572425	3.51447e-12	0.0224801	0.421469	0.0533375	1.81166e-11	2	41830743	41858642	41844700	294
ENSACAG00000000425	0.101969	1.9929	0.0511661	9.38792e-21	0.111153	1.61685	0.0687463	1.09258e-17	0.132142	2.90736	0.045451	2.961e-19	Un0336	439615	465987	452801	258
ENSACAG00000000426	0.111859	0.786214	0.142276	2.42414e-16	0.32198	0.997034	0.322938	2.68751e-08	0.185467	0.880653	0.210601	7.02377e-13	Un0252	45154	79045	62099.5	480
ENSACAG00000000428	0.0207821	0.33659	0.061743	1.00046e-14	0.0152038	0.334662	0.0454303	5.58513e-16	0.042383	0.36622	0.115731	7.66158e-12	3	106275941	106302437	106289189	471
ENSACAG00000000429	0.0696434	0.99832	0.0697606	7.0884e-11	0.0900731	1.15998	0.0776504	1.62826e-11	0.0855792	1.13783	0.0752127	6.19181e-11	Un0214	675642	677069	676356	177
ENSACAG00000000431	0.130079	0.712495	0.182569	1.01959e-09	0.128277	0.727944	0.176218	9.32963e-10	0.138297	0.627076	0.220542	1.1132e-07	3	15864626	15868088	15866357	303
ENSACAG00000000433	0.158092	0.508266	0.311043	5.17027e-07	0.171529	0.792501	0.21644	9.35011e-12	0.17428	0.716672	0.243179	3.87441e-10	3	30679126	30683090	30681108	462
ENSACAG00000000434	0.00765393	0.829044	0.00923224	1.46509e-179	0.00965445	0.985843	0.00979309	2.56993e-196	0.0452272	1.10655	0.0408722	3.65711e-158	Un0666	95002	136083	115542	2310
ENSACAG00000000435	0.194424	1.21717	0.159735	9.78711e-11	0.213827	1.14127	0.187359	2.56558e-09	0.220221	1.10508	0.199281	7.02892e-09	Un2736	2352	4071	3211.5	264
ENSACAG00000000438	0.136595	0.759325	0.17989	1.16485e-22	0.181404	0.941298	0.192717	1.05345e-22	0.171888	0.820992	0.209366	2.3626e-20	Un0175	469518	518213	493866	768
ENSACAG00000000440	0.0218169	3.1274	0.00697605	5.62573e-129	0.0255102	NA	NA	1.46265e-139	0.0209126	NA	NA	9.22088e-141	Un1716	10437	21912	16174.5	1089
ENSACAG00000000441	0.0193594	NA	NA	7.18125e-63	0.0165471	NA	NA	5.66974e-69	0.0207217	NA	NA	2.37428e-69	Un1173	55203	58794	56998.5	477
ENSACAG00000000443	0.109398	0.240057	0.455717	0.0539769	0.0907628	0.394241	0.230222	0.000692183	0.0895176	0.3561	0.251383	0.00157033	5	50861928	50862171	50862000	165
ENSACAG00000000445	0.00630796	0.831082	0.00759005	5.93736e-16	0.00630796	0.761921	0.00827902	4.68005e-15	0.0722405	0.653124	0.110608	9.40305e-08	Un3644	231	7200	3715.5	201
ENSACAG00000000446	0.122368	0.803253	0.152341	1.45644e-45	0.15058	0.916614	0.164279	1.08137e-44	0.152726	0.976329	0.156429	2.88917e-47	3	30666798	30674320	30670559	1398
ENSACAG00000000451	0.0982674	0.626985	0.15673	1.09207e-10	0.131392	0.708966	0.185329	5.75825e-10	0.13014	0.733532	0.177416	3.72665e-10	1	98211529	98238673	98225101	351
ENSACAG00000000452	0.0426093	0.861234	0.0494748	0.0162953	1.37172	1.47018	0.933031	0.994848	0.0426093	0.193699	0.219977	0.573389	Un0542	23204	60842	42023	30
ENSACAG00000000458	0.0308538	0.415214	0.0743081	1.41446e-08	0.0307409	0.310522	0.0989975	2.25452e-06	0.0244464	0.423704	0.0576969	1.26219e-10	Un0158	206291	245098	225694	225
ENSACAG00000000460	0.0870744	0.762657	0.114172	1.33322e-12	0.114042	1.08594	0.105017	1.30365e-15	0.137332	1.34794	0.101883	3.77515e-16	Un2584	841	12150	6495.5	303
ENSACAG00000000462	0.116841	1.12842	0.103544	4.21762e-08	0.0732353	0.957673	0.0764721	1.16861e-08	0.121599	1.72966	0.070302	1.74192e-09	Un0194	126044	154027	140036	138
ENSACAG00000000464	0.150361	1.46787	0.102435	7.60177e-27	0.17179	1.663	0.103301	1.48776e-26	0.173453	1.61895	0.107139	1.85159e-25	Un1175	2701	41189	21945	513
ENSACAG00000000469	0.0237637	0.826745	0.0287437	7.9664e-22	0.0171978	0.896594	0.0191813	2.23583e-25	0.0193722	0.874526	0.0221517	1.42746e-23	Un0371	155787	162339	159063	306
ENSACAG00000000470	0.12394	1.23743	0.100159	1.28818e-47	0.15702	1.37423	0.114261	6.15103e-44	0.19143	1.55557	0.12306	5.41546e-42	3	86669519	86676205	86672862	924
ENSACAG00000000471	0.121881	1.00538	0.121229	1.17637e-28	0.133997	0.985567	0.135959	8.01829e-26	0.1297	1.0867	0.119352	4.86552e-29	Un0054	748	1498	1123	675
ENSACAG00000000473	0.178243	1.27343	0.139971	4.42712e-06	0.151341	0.995575	0.152014	1.69407e-05	0.164128	0.983841	0.166823	3.35213e-05	Un0040	331658	331976	331817	123
ENSACAG00000000477	0.00149428	0.155488	0.00961031	1.14619e-19	0.00299462	0.149954	0.0199703	6.978e-18	0.00149505	0.155244	0.00963033	1.20632e-19	1	28995819	29032400	29014100	912
ENSACAG00000000479	0.124516	0.660236	0.188593	3.56145e-22	0.131743	0.65443	0.201309	7.41551e-21	0.14326	0.751794	0.190558	2.43499e-23	3	166267123	166284811	166275967	861
ENSACAG00000000481	0.0471079	1.03382	0.0455667	3.22134e-35	0.0706795	1.34625	0.0525009	1.78806e-37	0.0664085	1.39186	0.0477121	2.74855e-38	Un0175	550822	559507	555164	519
ENSACAG00000000482	0.0328737	0.851104	0.0386247	7.38632e-57	0.0491885	0.832862	0.0590596	2.23214e-49	0.0417737	0.890164	0.0469281	1.97199e-55	3	73953684	73956255	73955000	873
ENSACAG00000000483	0.080555	0.908902	0.0886289	4.26206e-34	0.0834064	1.14658	0.0727435	8.20021e-40	0.0902323	1.04911	0.0860082	8.12305e-36	3	15839635	15851198	15845400	672
ENSACAG00000000484	0.0407458	0.655852	0.0621265	1.37132e-23	0.0429141	0.680977	0.0630185	1.10207e-23	0.0463789	0.683667	0.0678384	2.43865e-23	6	38196996	38209539	38203300	480
ENSACAG00000000488	0.00687031	0.248941	0.0275982	4.90985e-17	0.133996	0.431558	0.310493	7.73006e-08	0.00456963	0.28886	0.0158195	1.13969e-20	2	21681538	21772076	21726807	585
ENSACAG00000000491	NA	0.926194	0	NA	1.37887	NA	NA	0.282645	0.121339	NA	NA	3.60504e-10	Un0391	148839	204386	176612	96
ENSACAG00000000492	0.18358	1.42192	0.129107	1.81874e-30	0.184032	1.89207	0.0972646	9.67933e-37	0.194957	1.9974	0.0976057	1.20631e-35	3	30643239	30654653	30648946	789
ENSACAG00000000496	0.17663	1.15031	0.15355	4.72437e-09	0.177225	1.53385	0.115543	2.777e-11	0.195293	1.74126	0.112156	6.27502e-12	Un4193	3333	6348	4840.5	228
ENSACAG00000000498	0.135519	1.38104	0.0981281	7.38602e-24	0.138411	1.1206	0.123514	8.23921e-20	0.121565	1.24157	0.097912	2.22008e-23	3	52576117	52586301	52581209	453
ENSACAG00000000499	0.0991719	1.19752	0.0828147	7.74239e-58	0.1165	1.17767	0.0989244	7.49571e-52	0.109125	1.20972	0.0902071	1.47757e-54	Un3062	5594	6725	6159.5	1023
ENSACAG00000000502	0.0645243	1.72514	0.0374023	5.51226e-53	0.199308	1.39924	0.14244	2.48301e-26	0.153642	1.60404	0.0957843	1.75407e-34	Un1611	2509	23725	13117	630
ENSACAG00000000506	0.0377158	0.736988	0.0511756	1.14742e-18	0.0484525	0.620297	0.0781118	4.0333e-14	0.169046	0.864753	0.195484	2.39266e-09	Un3222	1281	10179	5730	315
ENSACAG00000000508	0.104331	1.60565	0.0649772	1.07991e-20	0.101394	1.03204	0.0982462	6.09053e-15	0.0939119	0.98875	0.0949804	1.37744e-15	Un1160	22775	42546	32660.5	291
ENSACAG00000000509	0.0836343	1.07699	0.0776557	9.05448e-14	0.1046	1.31085	0.0797958	2.13948e-14	0.104749	0.81528	0.128483	9.38628e-10	Un0857	11478	12545	12011.5	222
ENSACAG00000000510	0.189966	0.343161	0.553575	0.169361	0.199489	0.267631	0.745389	0.492689	0.190548	0.339197	0.561763	0.171687	1	45406715	45426379	45416547	177
ENSACAG00000000511	0.0492766	0.74875	0.0658118	4.14099e-10	0.125125	1.35403	0.0924095	1.22667e-10	0.150707	1.13533	0.132742	1.12157e-08	Un0443	79656	88286	83971	189
ENSACAG00000000512	0.207138	1.26402	0.163872	1.25923e-28	0.279894	1.35614	0.206389	5.03705e-23	0.239179	1.29679	0.18444	5.09431e-26	Un0970	29408	60169	44788.5	822
ENSACAG00000000516	0.0506229	1.27783	0.0396162	8.00249e-12	0.072121	1.24683	0.0578436	1.6038e-10	0.0614398	1.23898	0.0495891	4.76476e-11	Un3533	7887	8025	7956	138
ENSACAG00000000523	0.0719901	0.616659	0.116742	4.07728e-40	0.0912083	0.711112	0.128262	8.42144e-40	0.0901084	0.692794	0.130065	2.46052e-40	3	166293561	166339705	166316633	1212
ENSACAG00000000524	0.0270641	0.720346	0.0375709	1.00392e-06	0.0133864	0.531732	0.0251752	5.36669e-06	0.0138356	0.888201	0.0155771	2.54994e-08	Un2180	2119	14857	8488	99
ENSACAG00000000527	0.0316406	0.400887	0.0789265	2.84757e-06	0.0363698	0.290853	0.125045	0.000525613	0.0363137	0.422331	0.0859841	9.88675e-06	1	253739905	253745040	253742000	150
ENSACAG00000000529	0.0123101	0.925647	0.0132989	1.54697e-22	0.160306	NA	NA	2.32828e-21	0.148323	NA	NA	3.47488e-21	5	90288056	90312499	90300300	264
ENSACAG00000000531	0.0587653	1.3071	0.0449585	6.96363e-26	0.0433444	1.4957	0.0289794	1.25106e-30	0.0471901	NA	NA	1.2114e-42	Un0619	3757	52400	28078.5	351
ENSACAG00000000533	0.0723889	0.97096	0.074554	9.17851e-61	0.0776149	0.947303	0.0819325	1.49336e-57	0.127009	0.989078	0.128412	1.32048e-45	3	30593752	30607455	30600600	1116
ENSACAG00000000535	0.095776	2.20622	0.0434119	1.14362e-34	0.100805	2.11326	0.0477011	5.50671e-33	0.0963017	1.85794	0.0518325	7.40191e-33	3	86653967	86660271	86657119	450
ENSACAG00000000537	0.125877	1.15451	0.10903	6.4042e-18	0.160872	1.58195	0.101692	1.13453e-18	0.131468	1.13702	0.115625	8.80644e-17	Un0175	595934	599564	597749	402
ENSACAG00000000538	0.247905	0.490539	0.505373	3.16415e-06	0.255089	0.615143	0.414683	4.06564e-10	0.264491	0.581885	0.454542	2.73984e-08	1	253724503	253737978	253731000	1110
ENSACAG00000000545	0.0789803	0.713187	0.110743	2.76002e-30	0.081618	0.85798	0.0951281	1.45509e-36	0.0900313	0.904857	0.0994978	2.20114e-36	1	97687308	97921843	97804600	834
ENSACAG00000000548	0.056316	0.703588	0.0800412	1.09781e-26	0.0602385	0.861857	0.0698938	1.50811e-30	0.112833	1.0933	0.103204	8.8104e-28	Un0175	633785	653399	643592	543
ENSACAG00000000549	0.0604174	1.22363	0.0493757	2.58957e-30	0.0747884	1.48366	0.050408	2.61147e-32	0.0834247	1.13893	0.073248	2.94668e-25	4	15280569	15312147	15296358	444
ENSACAG00000000550	0.0559976	0.257681	0.217314	0.00380497	0.0640122	0.298445	0.214486	0.00209717	0.0640122	0.298445	0.214486	0.00209717	Un0038	1606854	1615586	1611220	171
ENSACAG00000000551	0.113402	0.55789	0.203269	1.57464e-06	0.119667	0.719666	0.166282	4.73986e-09	0.125375	0.561757	0.223184	1.93457e-06	1	235626353	235629923	235628138	264
ENSACAG00000000556	0.0130808	0.614268	0.0212949	8.55143e-85	0.0167375	0.689854	0.0242623	1.42482e-89	0.0495749	0.699495	0.0708724	5.24471e-67	3	15762856	15790768	15776812	1458
ENSACAG00000000558	0.130245	1.01547	0.128262	2.71922e-69	0.142636	0.958008	0.148888	1.95484e-59	0.139693	0.981507	0.142325	1.88821e-64	Un1023	22423	27941	25182	1674
ENSACAG00000000559	0.103529	1.07304	0.096482	3.05119e-27	0.288877	1.39517	0.207054	3.24347e-16	0.110783	1.33844	0.0827706	6.43331e-32	Un0666	88456	89742	89099	543
ENSACAG00000000565	0.181842	0.889531	0.204424	3.54456e-09	0.187991	0.944009	0.199141	3.44181e-09	0.525869	0.997901	0.526975	0.00895386	Un0573	146280	196748	171514	306
ENSACAG00000000567	0.0358337	0.807757	0.044362	3.11256e-78	0.041796	0.982983	0.0425196	1.02559e-87	0.0491537	0.907566	0.0541599	4.16648e-77	Un0214	705344	734627	719986	1374
ENSACAG00000000575	0.10875	0.80997	0.134264	4.03091e-33	0.113306	1.08937	0.104011	2.83844e-44	0.124052	1.05354	0.117748	2.35331e-40	1	129396471	129410547	129403509	945
ENSACAG00000000579	0.11074	1.54315	0.0717622	1.00218e-23	0.11943	1.23886	0.0964032	8.28769e-20	0.116976	1.52816	0.076547	2.64879e-22	Un0824	8444	13406	10925	354
ENSACAG00000000580	0.0641942	0.482824	0.132956	2.92705e-15	0.0642196	0.649629	0.0988558	2.49444e-21	0.0759226	0.586314	0.129491	6.68284e-18	Un0662	79818	111838	95828	549
ENSACAG00000000581	0.0142192	0.571442	0.024883	4.04673e-15	0.0189536	0.701008	0.0270376	7.2033e-17	0.023807	0.694295	0.0342894	4.90568e-16	4	92683395	92696680	92690000	273
ENSACAG00000000582	0.0358673	0.69163	0.0518591	1.54064e-18	0.0377015	0.778167	0.0484491	6.86289e-21	0.0252156	0.688322	0.0366335	3.01383e-20	1	127302876	127310607	127307000	363
ENSACAG00000000583	0.0345375	0.567227	0.0608883	2.48631e-43	0.044481	0.593537	0.0749423	1.21541e-41	0.0447666	0.633563	0.0706584	1.36184e-44	2	21333686	21349550	21341618	1011
ENSACAG00000000587	0.176809	0.825959	0.214065	2.3204e-10	0.197497	1.62576	0.121479	5.23908e-17	0.188489	1.12376	0.167731	3.40032e-13	Un0860	4824	5784	5304	348
ENSACAG00000000590	0.0209346	0.446646	0.0468708	9.82268e-25	0.0219792	0.508133	0.0432549	2.34653e-28	0.0230837	0.444612	0.0519188	5.30231e-24	Un0119	463546	479791	471668	627
ENSACAG00000000592	0.0149279	0.772907	0.019314	3.91126e-57	0.0165767	0.712341	0.0232707	1.46369e-52	0.0182834	0.773481	0.0236378	2.83531e-55	Un0204	758482	775347	766914	810
ENSACAG00000000593	0.090393	2.00833	0.0450089	2.78121e-37	0.103582	1.42782	0.0725461	7.31635e-29	0.105246	2.58488	0.040716	1.96633e-37	c	9437526	9460704	9449115	480
ENSACAG00000000595	0.140493	1.77296	0.0792424	2.01363e-16	0.154828	2.99019	0.0517787	8.95537e-19	0.146266	1.66364	0.0879198	1.73854e-15	Un0141	643075	649031	646053	258
ENSACAG00000000598	0.124724	1.07727	0.115778	2.86983e-38	0.136453	1.40455	0.0971507	5.87226e-44	0.154805	1.12696	0.137365	5.19457e-34	Un0199	459734	460685	460210	822
ENSACAG00000000600	0.019373	1.13589	0.0170553	1.27676e-54	0.0193763	0.925319	0.0209401	9.18212e-48	0.0281174	1.11437	0.0252317	2.12023e-50	5	90189806	90273471	90231600	621
ENSACAG00000000601	0.252287	1.18822	0.212324	2.86573e-40	0.299505	1.36394	0.219588	5.98769e-39	0.266072	1.52677	0.174271	8.92055e-49	Un0336	344256	377523	360890	1560
ENSACAG00000000602	0.0139599	1.16236	0.0120099	1.20496e-27	0.00930379	0.789257	0.011788	1.28603e-22	0.0139993	0.713333	0.0196252	5.13731e-20	Un0552	104846	127415	116130	288
ENSACAG00000000605	0.0391192	0.704904	0.0554959	4.485e-13	0.0553976	0.943058	0.0587426	1.07447e-14	0.0690202	1.40374	0.0491689	7.5836e-17	3	70784575	70806956	70795800	246
ENSACAG00000000607	NA	0.74267	0	NA	NA	1.03367	0	NA	0.136475	NA	NA	4.56079e-09	Un0386	323464	332198	327831	99
ENSACAG00000000610	0.0620151	0.61007	0.101652	2.22438e-49	0.0678815	0.707665	0.0959232	1.07031e-54	0.079544	0.585115	0.135946	9.12717e-41	2	73499279	73529749	73514514	1329
ENSACAG00000000611	0.1118	1.02328	0.109256	1.58009e-16	0.0943894	1.82267	0.0517865	3.39343e-26	0.0946357	1.29128	0.0732881	1.41738e-20	Un1128	37470	39285	38377.5	327
ENSACAG00000000612	0.0379257	0.682852	0.0555401	7.45754e-22	0.046404	0.752077	0.0617011	1.36244e-21	0.0636875	0.623631	0.102124	8.04529e-16	Un0697	131250	145388	138319	408
ENSACAG00000000613	0.142041	1.16009	0.12244	6.27284e-20	0.146266	1.00789	0.145121	1.62708e-16	0.136883	0.932603	0.146775	3.00322e-16	Un0199	332374	367679	350026	444
ENSACAG00000000615	0.030779	NA	NA	7.18512e-20	0.0309441	1.63972	0.0188715	1.80535e-12	0.0416241	NA	NA	9.30743e-15	Un0860	38460	39863	39161.5	126
ENSACAG00000000622	0.0517744	0.977509	0.0529657	2.3238e-26	0.0459401	1.05436	0.0435717	6.49979e-29	0.0941947	0.937478	0.100477	8.48365e-20	Un0371	150167	154585	152376	435
ENSACAG00000000624	0.168332	0.941004	0.178885	5.78841e-19	0.271491	0.885715	0.306522	1.17783e-10	0.15735	0.820459	0.191783	2.10077e-16	Un0666	41941	64856	53398.5	558
ENSACAG00000000625	0.344009	1.50992	0.227833	7.81874e-14	0.391232	2.32504	0.168269	3.03663e-16	0.374916	1.86754	0.200753	6.46475e-15	3	88625496	88638102	88631799	534
ENSACAG00000000627	0.0719412	0.611491	0.117649	1.74313e-25	0.0765982	0.736059	0.104065	1.50701e-29	0.0830283	0.720505	0.115236	4.94675e-28	2	20891369	20908504	20899900	759
ENSACAG00000000631	0.00543973	1.13951	0.00477375	1.25508e-22	0.00544672	1.62	0.00336217	1.40809e-26	0.084582	NA	NA	1.95853e-29	Un0857	30104	80177	55140.5	234
ENSACAG00000000640	0.103789	0.728831	0.142405	1.41764e-11	0.105943	0.680357	0.155716	5.09469e-11	0.143129	0.768698	0.186196	6.60071e-10	Un0054	188478	209260	198869	333
ENSACAG00000000644	0.0987234	0.720631	0.136996	7.8375e-34	0.0970436	0.748541	0.129644	1.61025e-36	0.124026	0.784046	0.158187	5.17269e-32	3	166360446	166396280	166378363	1026
ENSACAG00000000648	0.013227	0.309279	0.0427673	0.00119563	0.013227	0.309279	0.0427673	0.00119563	0.0404021	0.309279	0.130633	0.00850067	Un0019	2840612	2931055	2885830	96
ENSACAG00000000649	0.013698	1.49758	0.00914677	6.17993e-20	1.15539	3.46245	0.333691	0.0482674	0.0137106	1.94536	0.00704784	6.48546e-22	3	88594536	88622530	88608533	189
ENSACAG00000000651	0.0652048	1.00825	0.0646715	1.0939e-27	0.137173	1.68263	0.0815231	3.52853e-27	0.199819	3.16023	0.0632294	9.50798e-28	Un0386	339178	346341	342760	480
ENSACAG00000000654	0.129369	0.923261	0.140122	2.27131e-13	0.135843	1.11249	0.122107	1.13146e-15	0.150242	1.3093	0.11475	1.30685e-16	Un0204	781746	818647	800196	318
ENSACAG00000000657	0.0841945	0.778491	0.108151	6.3339e-44	0.0962467	0.953323	0.100959	2.94595e-49	0.0937315	0.895045	0.104723	4.32674e-47	Un0368	81728	97064	89396	1134
ENSACAG00000000662	0.128951	3.51111	0.0367265	7.90858e-87	0.164475	NA	NA	2.86791e-85	0.145074	NA	NA	3.57158e-96	Un0824	94632	103865	99248.5	1137
ENSACAG00000000663	0.0872053	0.669694	0.130217	1.31731e-33	0.014084	0.580247	0.0242725	9.20143e-56	0.0153965	0.64289	0.0239488	4.78865e-60	1	126980783	127037676	127009000	1026
ENSACAG00000000665	0.0209856	0.727488	0.0288467	1.97676e-41	0.0238203	0.845552	0.0281713	5.09348e-46	0.0209385	1.06397	0.0196795	1.51139e-54	3	30571927	30582605	30577266	684
ENSACAG00000000666	0.0323115	0.52484	0.0615646	8.05122e-15	0.0304993	0.600114	0.0508224	9.77255e-18	0.0269339	0.489083	0.0550701	2.72186e-15	1	235501418	235518319	235510000	366
ENSACAG00000000667	0.0551501	0.510331	0.108067	3.23445e-51	0.0638009	0.607634	0.104999	4.5415e-58	0.0633114	0.58477	0.108267	2.81223e-56	1	236544017	236562912	236553000	1641
ENSACAG00000000669	0.145768	0.595337	0.24485	9.79566e-21	0.165315	0.642952	0.257119	1.27291e-20	0.165149	0.630586	0.261898	1.4341e-19	Un0033	786278	797182	791730	1137
ENSACAG00000000671	0.058041	0.657651	0.088255	1.98036e-08	0.110416	1.13921	0.0969236	5.22552e-10	1.12302	1.59971	0.702014	0.373112	2	73448908	73486677	73467800	171
ENSACAG00000000675	0.0723566	1.13585	0.0637024	6.75289e-12	0.0649627	1.74497	0.0372286	1.11288e-15	0.057316	1.80669	0.0317243	2.04295e-16	1	30781466	30799687	30790600	186
ENSACAG00000000677	0.121015	0.794309	0.152352	2.04541e-33	0.116935	0.790626	0.147902	3.99009e-34	0.12777	0.898803	0.142156	1.14699e-37	4	83037626	83069292	83053459	1077
ENSACAG00000000678	0.0289895	0.86004	0.0337072	1.20881e-31	0.12262	0.863192	0.142054	2.90309e-18	0.0408336	0.958767	0.0425897	2.18977e-31	Un1023	42607	46807	44707	465
ENSACAG00000000684	0.114245	0.800431	0.142729	4.57589e-16	0.133411	0.900697	0.14812	1.70624e-16	0.137868	0.944755	0.14593	3.27273e-16	Un0125	6557	7911	7234	420
ENSACAG00000000687	0.0584396	0.91547	0.0638356	2.36404e-36	0.0631658	0.893252	0.0707144	6.69226e-35	0.0879789	0.956406	0.0919891	2.37383e-31	1	30369127	30425798	30397500	666
ENSACAG00000000689	0.0945112	0.628374	0.150406	1.20508e-21	0.112302	0.704592	0.159386	9.20946e-22	0.154201	0.748983	0.205881	1.0233e-17	3	106410993	106444972	106428000	723
ENSACAG00000000693	0.00861497	0.665819	0.0129389	6.43121e-11	0.127121	1.16141	0.109455	6.76355e-09	0.0172781	0.676251	0.0255498	4.12583e-10	Un0443	305969	316559	311264	153
ENSACAG00000000694	0.0439008	0.898518	0.0488591	0.00399649	0.0439008	0.613299	0.0715815	0.016899	1.08179	0.512323	2.11154	0.249774	Un0100	1436672	1445577	1441120	33
ENSACAG00000000695	0.0335662	0.591087	0.0567872	1.25223e-18	0.0302551	0.698919	0.0432884	2.84258e-22	0.0369329	0.97148	0.0380172	2.21469e-27	Un0119	483175	505133	494154	402
ENSACAG00000000696	0.121156	0.982014	0.123376	7.50186e-20	0.152839	1.14342	0.133668	5.00084e-20	0.206831	1.1882	0.174071	4.70606e-16	Un0363	393388	405559	399474	429
ENSACAG00000000697	0.0489932	1.4176	0.0345608	7.40933e-24	0.056039	1.1564	0.04846	1.69863e-19	0.0605914	1.99189	0.0304191	2.35175e-26	Un0619	83303	83609	83456	285
ENSACAG00000000701	0.0661529	1.8678	0.0354176	1.59713e-44	0.0850694	1.46344	0.0581298	2.12058e-36	0.0824259	1.65326	0.0498566	2.14555e-39	Un0619	146371	158374	152372	537
ENSACAG00000000704	0.0335993	1.52629	0.0220138	8.43191e-56	0.034797	2.30088	0.0151233	2.3369e-63	0.0391919	NA	NA	1.68484e-67	Un0697	105903	118649	112276	609
ENSACAG00000000705	0.345181	1.7023	0.202773	1.53533e-09	0.20327	1.10972	0.183172	1.06846e-10	0.2013	1.84127	0.109327	3.12451e-16	Un0666	25094	39720	32407	303
ENSACAG00000000706	0.0229608	0.486583	0.0471878	1.13028e-87	0.0292974	0.549416	0.0533246	9.38324e-90	0.0265344	0.609362	0.0435445	1.04281e-105	Un0022	2757197	2759471	2758334	2106
ENSACAG00000000712	0.0598651	1.58706	0.0377208	2.22645e-35	0.0878298	1.71193	0.0513044	3.40202e-32	1.18307	NA	NA	7.20326e-06	6	38150666	38192835	38171800	462
ENSACAG00000000718	0.0361651	0.761007	0.0475228	4.86559e-67	0.0586852	0.924419	0.0634833	2.15443e-66	0.0404675	0.825502	0.0490217	2.22835e-69	Un0033	1219262	1297664	1258463	1248
ENSACAG00000000719	0.0871232	0.715805	0.121714	7.10916e-18	0.117084	0.8175	0.143222	1.01892e-17	0.105162	1.17936	0.0891689	6.09965e-26	3	70733356	70767324	70750340	447
ENSACAG00000000720	0.0113369	0.916841	0.0123652	4.84923e-18	0.0113369	1.0764	0.0105322	6.78783e-20	0.0113369	0.916841	0.0123652	4.84923e-18	Un0196	38989	41911	40450	225
ENSACAG00000000725	0.194815	1.19814	0.162597	4.7315e-34	0.228925	1.27497	0.179553	1.6569e-31	0.222888	1.10706	0.201333	1.45821e-27	1	236613087	236614089	236613588	930
ENSACAG00000000728	0.283418	0.878919	0.322461	1.53544e-22	0.320861	1.15147	0.278653	1.10342e-28	0.353017	1.16839	0.302139	2.08128e-25	1	220937627	220940399	220939013	1551
ENSACAG00000000731	0.114328	0.52802	0.216522	4.55699e-10	0.112809	0.541791	0.208216	3.43142e-11	0.11054	0.53702	0.205841	9.40765e-11	1	220848368	220864879	220857000	465
ENSACAG00000000732	0.0867077	0.754104	0.114981	3.54057e-27	0.0986249	0.833661	0.118303	7.81981e-28	0.179691	1.14271	0.15725	2.6417e-25	1	236627427	236651970	236640000	714
ENSACAG00000000734	0.132642	1.15137	0.115204	3.50464e-17	0.152797	1.74589	0.0875178	4.52624e-21	0.144465	1.15013	0.125607	2.84184e-16	Un0058	1282211	1296894	1289550	387
ENSACAG00000000735	0.0201314	0.536492	0.037524	1.32152e-19	0.0492877	0.587733	0.0838607	1.22008e-16	0.0372699	0.585849	0.0636169	6.59765e-18	3	118552748	118577718	118565233	396
ENSACAG00000000736	0.0615929	0.60634	0.101581	3.82468e-35	0.0695188	0.6665	0.104304	5.00239e-36	0.112192	0.667904	0.167976	9.45059e-27	Un0252	158377	174181	166279	975
ENSACAG00000000738	0.00794709	0.687759	0.0115551	4.03526e-34	0.0105891	1.02416	0.0103393	1.65544e-43	0.0132584	0.991446	0.0133728	1.50236e-41	Un2405	6979	14305	10642	495
ENSACAG00000000739	0.0694816	0.852722	0.0814821	1.94714e-31	0.0757901	0.928472	0.0816288	2.32843e-32	0.0693132	1.12343	0.0616976	2.41812e-39	3	30562833	30571275	30567054	636
ENSACAG00000000744	0.00614638	0.705046	0.0087177	3.14306e-30	0.00615546	0.624359	0.00985885	1.2137e-27	0.00615218	0.701339	0.00877206	3.77717e-30	1	222126320	222132156	222129238	423
ENSACAG00000000746	0.082073	1.03458	0.0793296	2.17367e-22	0.190215	1.07769	0.176502	5.91762e-14	0.181626	1.10772	0.163964	3.38446e-14	Un0737	32137	57661	44899	405
ENSACAG00000000747	0.0888235	0.772229	0.115022	1.43392e-25	0.103192	0.764734	0.134939	8.53361e-23	0.101274	0.874477	0.115811	1.08739e-26	5	67516578	67555072	67535825	675
ENSACAG00000000748	0.0617521	0.79702	0.0774787	2.53266e-38	0.0731103	0.888239	0.0823093	7.29495e-40	0.0764776	0.956693	0.0799395	1.53707e-41	4	15088366	15089347	15088900	810
ENSACAG00000000751	0.055298	0.420739	0.131431	5.33706e-12	0.0552485	0.373945	0.147745	2.20889e-10	0.055298	0.372531	0.148439	2.41837e-10	Un0133	829575	852840	841208	462
ENSACAG00000000752	0.129816	0.963928	0.134674	1.5878e-25	0.119481	0.895431	0.133434	5.29179e-25	0.128802	0.689545	0.186793	2.45447e-17	Un0581	37025	50434	43729.5	621
ENSACAG00000000755	0.0471085	0.731639	0.0643876	3.63266e-45	0.0590376	0.926917	0.0636924	8.16581e-52	0.0687065	1.01635	0.067601	3.54532e-52	1	227568998	227597554	227583276	972
ENSACAG00000000756	0.0526213	1.0267	0.0512529	5.71366e-86	0.0857971	1.42216	0.0603286	2.8405e-89	0.128635	1.35555	0.094895	5.50947e-71	Un0090	1496262	1511942	1504102	1434
ENSACAG00000000757	0.054314	1.37562	0.0394834	1.42966e-81	0.0634105	1.52037	0.0417074	6.13739e-82	0.0575668	1.59242	0.0361504	6.33069e-86	Un0368	59522	80683	70102.5	1077
ENSACAG00000000758	NA	NA	NA	NA	NA	NA	NA	NA	0.182762	NA	NA	2.09333e-09	Un0363	469854	475052	472453	69
ENSACAG00000000760	0.108571	0.906401	0.119783	2.50503e-11	0.132135	0.823259	0.160503	4.35666e-09	0.111156	1.02767	0.108163	7.34973e-12	Un0054	262193	270327	266260	249
ENSACAG00000000762	0.127926	0.727002	0.175964	3.44911e-12	0.11862	0.876442	0.135343	3.33894e-15	0.128079	0.815605	0.157036	7.18352e-14	1	126934250	126958951	126947000	408
ENSACAG00000000763	0.00964632	0.632908	0.0152413	4.58956e-37	0.0107364	0.736077	0.014586	3.80525e-40	0.011805	0.730861	0.0161522	2.73297e-40	2	32192590	32193190	32192890	597
ENSACAG00000000764	0.182066	0.941675	0.193343	1.49138e-13	0.21523	1.09041	0.197384	7.90534e-14	0.223323	1.03791	0.215165	1.01426e-12	Un0193	674259	681031	677645	453
ENSACAG00000000766	0.104063	1.02553	0.101472	1.90537e-18	0.131275	1.12658	0.116526	1.18564e-17	0.109886	1.14573	0.0959087	6.92665e-19	2	73420137	73424382	73422300	351
ENSACAG00000000767	0.0528958	0.611155	0.0865506	3.33487e-11	0.0419087	0.783151	0.0535129	3.90722e-15	0.041985	0.822207	0.0510637	8.84658e-16	1	235477977	235481507	235479742	258
ENSACAG00000000768	0.0642797	0.713573	0.0900815	1.59953e-31	0.0704374	0.656009	0.107373	6.90624e-28	0.121576	0.82421	0.147506	7.21073e-26	2	32083567	32121042	32102300	756
ENSACAG00000000770	0.0610533	0.525473	0.116187	2.8397e-52	0.0685888	0.571564	0.120002	5.29678e-55	0.0830185	0.557124	0.149013	7.22429e-47	2	41922398	41939905	41931200	1827
ENSACAG00000000772	NA	0.43413	0	NA	0.0099058	0.633908	0.0156266	5.50687e-09	NA	0.633908	0	NA	Un0019	2418287	2452137	2435212	132
ENSACAG00000000773	0.150122	0.605827	0.247796	7.34853e-10	0.183616	0.647961	0.283375	3.67524e-09	0.186926	0.630306	0.296563	2.05221e-08	Un0194	613229	672538	642884	483
ENSACAG00000000774	0.0247101	0.379029	0.065193	2.58339e-07	0.0174691	0.430476	0.0405809	8.14077e-09	0.0245422	0.575956	0.0426112	2.26427e-10	4	68484461	68493762	68489100	186
ENSACAG00000000776	0.0469182	0.515896	0.0909451	8.85493e-26	0.0377837	0.63062	0.059915	1.73682e-34	0.0594097	0.672133	0.0883898	2.7202e-30	3	30545598	30557980	30551789	747
ENSACAG00000000777	0.0896978	0.678573	0.132186	2.32458e-18	0.134967	0.788504	0.171169	4.88043e-17	0.119729	0.931003	0.128602	1.38596e-21	3	118742744	118753112	118747928	549
ENSACAG00000000778	0.0380422	1.47487	0.0257935	3.93752e-99	0.0388223	1.47096	0.0263925	8.29723e-98	0.0669593	1.16939	0.0572598	3.20791e-71	Un0347	423521	438384	430952	1122
ENSACAG00000000779	0.0958279	0.958313	0.0999964	2.04333e-54	0.0951635	0.937021	0.10156	5.64725e-54	0.107582	1.03821	0.103622	2.0468e-55	3	15721964	15733029	15727500	1203
ENSACAG00000000780	0.0480161	0.448114	0.107152	5.77109e-30	0.0446369	0.449424	0.0993201	9.55953e-32	0.041872	0.436017	0.096033	1.4855e-31	1	235435261	235473606	235454000	1023
ENSACAG00000000781	0.0315013	1.93546	0.0162759	3.31236e-46	0.220108	1.95601	0.112529	3.85936e-21	0.0551087	1.78341	0.0309007	4.52335e-39	Un0706	18766	81386	50076	459
ENSACAG00000000782	0.0228434	0.76057	0.0300345	0.000222314	0.904647	1.23038	0.735259	0.755969	0.0228434	1.02041	0.0223864	3.32356e-05	4	83245933	83407356	83326600	57
ENSACAG00000000783	0.00214812	0.198912	0.0107994	3.41915e-16	0.00214654	0.263621	0.00814252	5.96457e-21	0.00648834	0.246358	0.0263371	1.63e-17	2	73364146	73387116	73375631	615
ENSACAG00000000787	0.0662329	0.750509	0.0882506	3.95354e-33	0.191357	NA	NA	1.35704e-69	0.188409	NA	NA	5.42762e-72	Un0443	251452	268700	260076	786
ENSACAG00000000788	0.149148	0.635551	0.234675	3.77942e-10	0.171162	0.931423	0.183763	5.91916e-15	0.19004	0.792403	0.239827	3.16537e-11	2	164417097	164436585	164426841	477
ENSACAG00000000789	0.0513534	0.784598	0.0654518	2.53491e-30	0.0467569	0.902577	0.0518038	2.64864e-35	0.0478286	0.950407	0.0503244	4.15451e-37	Un0040	119640	137426	128533	600
ENSACAG00000000791	0.0300417	0.576876	0.0520765	3.22989e-25	0.0797516	0.927033	0.0860289	1.18137e-26	0.0447959	0.788188	0.056834	9.90436e-29	Un0046	1108140	1112718	1110429	516
ENSACAG00000000792	0.00676385	1.45466	0.00464979	1.48867e-20	0.0204338	0.982356	0.0208008	7.12061e-15	0.0135571	1.08301	0.012518	1.108e-16	Un0019	2517355	2526401	2521878	189
ENSACAG00000000793	0.0129498	0.616103	0.021019	2.18012e-12	0.00644858	0.920777	0.00700341	1.38403e-17	0.00644858	0.783339	0.00823216	7.75135e-16	Un0133	474794	508304	491549	201
ENSACAG00000000794	0.148475	0.991554	0.14974	3.71518e-09	0.0826473	0.64893	0.127359	5.26812e-08	0.0825499	0.483802	0.170627	7.68532e-06	Un0666	9804	19722	14763	204
ENSACAG00000000795	0.0717568	1.00515	0.0713891	3.24335e-52	0.1031	1.26111	0.0817532	2.24887e-52	0.104382	1.32278	0.0789109	1.26427e-53	1	96949459	96950527	96949993	930
ENSACAG00000000796	0.0663247	NA	NA	5.83047e-25	0.0880038	NA	NA	2.90186e-21	0.0878736	NA	NA	3.38201e-20	Un2074	8237	9420	8828.5	189
ENSACAG00000000797	0.0653927	1.05335	0.0620804	2.84209e-25	0.0789084	1.37527	0.0573766	1.8126e-28	0.0684874	1.44628	0.0473542	3.79542e-32	Un0252	188905	195151	192028	429
ENSACAG00000000798	0.016475	0.785524	0.0209733	3.38133e-17	0.0498272	3.51658	0.0141692	1.81555e-24	0.0458006	1.65669	0.0276459	1.55771e-21	3	70670378	70683145	70676800	261
ENSACAG00000000800	0.104215	0.44865	0.232285	4.14337e-08	0.115021	0.505987	0.22732	8.11184e-09	0.116523	0.611223	0.190638	9.70764e-11	Un1104	24901	41258	33079.5	420
ENSACAG00000000801	0.00515885	0.346003	0.0149098	2.81067e-75	0.008608	0.351206	0.0245099	5.71783e-71	0.00975776	0.353217	0.0276254	3.16303e-69	1	48501095	48503006	48502100	1908
ENSACAG00000000802	0.00788154	0.534316	0.0147507	1.12791e-51	0.0381309	0.544305	0.0700542	4.19456e-37	0.0151889	0.489672	0.0310185	7.60652e-44	5	51170777	51232985	51201881	972
ENSACAG00000000803	0.148792	0.672286	0.221322	7.39341e-08	0.160274	0.789826	0.202923	3.47761e-09	0.164143	0.831993	0.197288	8.68093e-10	5	67502236	67504238	67503237	324
ENSACAG00000000804	0.0316036	0.661145	0.0478013	4.62219e-46	0.0204317	0.706454	0.0289216	5.94641e-55	0.0286552	0.651974	0.0439514	1.00196e-46	1	96800054	96850914	96825484	918
ENSACAG00000000805	0.107287	0.763455	0.140529	3.44845e-20	0.104846	0.806883	0.12994	9.33562e-22	0.107264	0.854166	0.125577	9.43483e-23	Un0019	2744204	2750273	2747240	603
ENSACAG00000000808	0.114452	0.983989	0.116314	2.16064e-62	0.117943	1.1539	0.102212	2.87239e-71	0.126062	1.1647	0.108235	1.0382e-68	2	134653203	134682880	134668000	1467
ENSACAG00000000810	0.0278701	0.654784	0.0425638	1.35931e-18	0.0482972	1.22804	0.0393286	1.0712e-25	0.0484135	1.20524	0.0401691	1.79453e-25	Un0175	1061230	1076263	1068750	336
ENSACAG00000000815	0.0125476	0.627892	0.0199837	2.13272e-77	0.0115777	0.634891	0.0182358	4.1166e-79	0.0086633	0.620573	0.0139602	1.14682e-80	Un0031	1603555	1614876	1609220	1341
ENSACAG00000000816	0.103846	1.95351	0.0531589	1.22664e-57	0.110379	1.87605	0.0588361	9.06301e-55	0.108901	1.74085	0.0625563	2.42937e-53	Un0697	64282	97855	81068.5	837
ENSACAG00000000818	0.0106661	0.981535	0.0108667	1.40139e-10	0.137454	NA	NA	4.78564e-13	0.0106975	NA	NA	1.664e-20	5	90152591	90170726	90161700	120
ENSACAG00000000820	0.207684	1.32527	0.15671	2.7501e-05	0.160825	1.25232	0.128422	5.16279e-06	0.174536	1.20665	0.144645	1.27857e-05	4	68480487	68480613	68480550	123
ENSACAG00000000821	0.103744	0.45314	0.228944	2.88359e-06	0.0951456	0.67866	0.140196	4.20265e-11	0.0980306	0.614889	0.159428	1.9664e-09	4	68268412	68278260	68273336	291
ENSACAG00000000822	0.192628	1.62032	0.118882	2.59626e-29	0.214783	1.3182	0.162937	4.95695e-23	0.223335	1.21476	0.183851	2.25923e-20	1	222148131	222174973	222161552	648
ENSACAG00000000824	0.0277837	0.924234	0.0300613	1.85755e-70	0.033488	1.10762	0.0302342	9.59649e-77	0.0362471	1.1447	0.0316652	1.55766e-76	1	126820404	126827840	126824122	1011
ENSACAG00000000825	0.0906815	0.908024	0.0998668	1.89949e-20	0.116006	1.1875	0.0976896	2.47904e-22	1.04415	3.4009	0.307021	0.00108398	3	88477074	88592008	88534541	453
ENSACAG00000000829	0.1253	1.46446	0.0855606	2.05722e-20	0.141171	1.50834	0.0935933	3.99052e-20	0.139861	2.57226	0.0543728	6.80338e-25	Un3025	2116	11132	6624	351
ENSACAG00000000830	0.217741	0.69613	0.312787	3.48324e-08	0.248707	0.871135	0.285498	1.3627e-09	0.243394	0.799038	0.30461	8.86489e-09	1	252872477	252911788	252892000	483
ENSACAG00000000831	0.0269636	0.790923	0.0340913	3.90854e-35	0.373427	NA	NA	9.16982e-33	0.0389927	0.839283	0.0464595	2.30325e-33	3	15508197	15552409	15530303	558
ENSACAG00000000833	0.0245525	0.841944	0.0291617	1.66749e-29	0.0530385	1.314	0.040364	8.95756e-33	0.0229505	0.969146	0.0236811	7.44153e-34	Un0133	391190	403443	397316	432
ENSACAG00000000834	0.0249735	1.36633	0.0182779	1.09523e-27	0.0234742	1.55362	0.0151093	3.24492e-29	0.0320651	1.26774	0.025293	3.82791e-26	Un0214	774471	779332	776902	285
ENSACAG00000000837	0.0883057	1.31933	0.066932	9.34454e-79	0.213036	1.64823	0.129252	1.84304e-53	0.0970308	1.44834	0.0669946	4.48889e-79	Un0581	61763	76137	68950	1227
ENSACAG00000000839	0.0368999	0.535309	0.068932	5.81138e-16	0.0449351	0.683092	0.0657819	9.59071e-19	0.0368268	0.780874	0.047161	2.60503e-22	1	129353213	129360482	129357000	354
ENSACAG00000000840	0.221955	1.02119	0.217349	4.67392e-09	0.197508	1.18192	0.167108	1.61147e-11	0.206728	1.21119	0.170681	3.92469e-11	2	134620944	134641580	134631262	303
ENSACAG00000000843	0.013284	0.430484	0.0308583	4.07847e-72	0.014782	0.407694	0.0362577	7.8987e-67	0.0162641	0.435448	0.0373502	1.01154e-69	Un0058	1330016	1338007	1334010	1767
ENSACAG00000000847	0.472216	0.79266	0.595736	0.190603	0.133276	0.505441	0.263683	0.00472691	0.144483	0.584875	0.247033	0.000686605	3	63150692	63176294	63163493	120
ENSACAG00000000848	0.00543812	0.939177	0.0057903	8.17829e-43	0.00816436	0.857106	0.0095255	4.68258e-39	0.00816143	0.91656	0.00890441	7.9873e-41	Un0283	535570	548012	541791	483
ENSACAG00000000850	0.0156184	0.449144	0.0347736	2.76291e-73	0.0494184	0.5249	0.0941483	1.77098e-59	0.0388672	0.548615	0.070846	7.84266e-69	6	38076269	38148027	38112148	1767
ENSACAG00000000851	0.0640221	0.713534	0.0897253	3.00723e-47	0.0745566	0.782488	0.0952815	1.36607e-48	0.0841164	0.769491	0.109314	2.19093e-44	5	67476483	67490020	67483300	1143
ENSACAG00000000855	0.110099	0.766004	0.143732	1.50841e-07	0.127675	0.973734	0.131119	7.14119e-09	0.133146	1.12346	0.118515	2.1005e-09	1	45349839	45368928	45359400	192
ENSACAG00000000856	0.0825035	0.48866	0.168836	7.51405e-05	0.114844	0.669447	0.171551	1.51919e-05	0.10639	0.677889	0.156943	7.3657e-06	1	126748970	126774056	126761513	177
ENSACAG00000000858	0.0754729	0.786079	0.0960118	4.02904e-41	0.0809321	0.876218	0.0923653	1.60467e-43	0.084254	0.903447	0.0932583	1.16851e-43	Un0031	1466042	1524533	1495290	930
ENSACAG00000000860	0.0405085	0.661189	0.0612661	1.41537e-24	0.0418918	0.713458	0.0587166	1.03541e-26	0.0405033	0.724272	0.0559228	1.03541e-26	Un0040	36657	90468	63562.5	501
ENSACAG00000000861	0.0781622	1.4536	0.0537713	2.75765e-29	0.0495765	1.48927	0.0332891	7.43473e-34	0.0614174	1.87986	0.0326712	2.61302e-35	Un0204	832782	840663	836722	387
ENSACAG00000000862	0.038671	0.60121	0.0643219	1.75123e-15	0.0342115	0.55311	0.061853	7.54205e-15	0.0430381	0.502508	0.0856467	1.81428e-12	3	52379516	52401155	52390300	321
ENSACAG00000000866	0.0689647	0.953146	0.0723548	7.38889e-84	0.0766288	1.0609	0.0722299	5.64856e-88	0.112372	1.02524	0.109606	2.07404e-69	Un0103	997659	1031725	1014692	1563
ENSACAG00000000867	0.0424934	0.532371	0.0798191	1.98703e-08	0.0557944	0.865764	0.0644452	1.99247e-11	0.0560025	0.644154	0.0869396	5.46291e-09	1	126740006	126745627	126743000	198
ENSACAG00000000868	0.0284544	0.795613	0.0357641	1.71255e-19	0.0409752	1.18268	0.034646	1.56675e-23	0.0495245	1.32154	0.0374748	6.09498e-24	Un0577	50125	66055	58090	318
ENSACAG00000000869	0.130172	0.822716	0.158222	1.68125e-06	0.204065	0.679079	0.300502	0.00190374	0.183663	0.767061	0.239437	0.000235542	Un1272	31307	35751	33529	150
ENSACAG00000000870	0.0311417	0.619477	0.050271	9.72389e-16	0.0311417	0.651205	0.0478216	1.89731e-16	0.0357386	0.714843	0.0499951	3.47697e-17	1	129332806	129343404	129338105	303
ENSACAG00000000871	0.0759558	0.765903	0.0991716	3.23138e-32	0.0717642	0.878336	0.0817047	1.52021e-38	0.0800417	1.02827	0.0778411	1.31805e-41	1	126710220	126729839	126720000	798
ENSACAG00000000876	0.0707052	0.777176	0.090977	1.14404e-65	0.0852799	0.929731	0.0917254	6.64541e-71	0.0817724	1.04257	0.0784336	1.8112e-80	3	30506144	30534255	30520200	1554
ENSACAG00000000885	0.0166389	0.616951	0.0269696	1.05763e-15	0.0279339	0.577079	0.0484058	6.97939e-12	0.0279465	0.804151	0.0347528	1.25207e-15	Un0046	1051505	1075559	1063532	237
ENSACAG00000000886	0.0513774	1.23751	0.0415167	1.1814e-24	0.081739	1.40845	0.0580349	4.41681e-22	0.076152	1.21323	0.062768	1.88738e-21	3	63048859	63060695	63054777	342
ENSACAG00000000888	NA	0.418878	0	NA	0.0238058	0.337057	0.0706284	2.28344e-05	NA	0.686953	0	NA	Un0046	1037184	1042737	1039960	141
ENSACAG00000000892	0.0417538	1.21635	0.0343272	1.27361e-43	0.0022844	1.15521	0.00197748	5.21385e-57	0.00342817	1.63851	0.00209224	3.76171e-67	Un0090	1475760	1490100	1482930	564
ENSACAG00000000896	0.114625	0.659293	0.17386	4.36744e-79	0.12576	0.761053	0.165245	2.39933e-88	0.135317	0.772331	0.175206	2.70192e-84	1	222223310	222265816	222244563	3120
ENSACAG00000000900	0.0483998	0.565188	0.0856349	1.79048e-14	0.0882118	0.768283	0.114817	1.12606e-15	0.0942981	0.868423	0.108585	8.8237e-17	5	90092448	90138312	90115380	363
ENSACAG00000000902	0.0604706	0.90335	0.0669404	4.10587e-57	0.0564688	1.1144	0.0506719	2.33642e-69	0.0644614	1.02353	0.0629795	8.73586e-62	Un0336	280996	282052	281524	1047
ENSACAG00000000904	0.259267	1.09197	0.237431	6.27395e-09	0.238486	1.99062	0.119805	1.97294e-15	0.249562	1.65852	0.150473	6.5619e-13	Un0194	732807	737573	735190	315
ENSACAG00000000912	0.102082	1.37249	0.0743775	8.80905e-53	0.0868973	2.01712	0.0430799	9.61405e-69	0.0977577	1.3965	0.0700019	7.99418e-54	Un0336	217913	218900	218406	891
ENSACAG00000000915	0.0541205	0.421056	0.128535	1.75656e-31	0.0742265	0.507234	0.146336	2.75874e-33	0.0751955	0.465051	0.161693	2.41151e-29	2	31881525	31882914	31882200	1293
ENSACAG00000000917	0.00828996	0.747372	0.0110922	2.9932e-11	0.00832425	0.727853	0.0114367	1.32401e-13	0.00833398	NA	NA	1.26432e-23	Un0367	44536	59343	51939.5	153
ENSACAG00000000919	0.0131553	0.649439	0.0202564	7.28898e-24	0.0169403	0.769146	0.0220248	4.53944e-26	0.0201459	0.834877	0.0241303	1.23381e-26	3	30476964	30501944	30489454	357
ENSACAG00000000920	0.0994159	0.535071	0.1858	0.00846678	0.0994159	0.655823	0.15159	0.00251999	0.0994159	0.535071	0.1858	0.00846678	3	63021293	63043660	63032500	72
ENSACAG00000000921	0.0444303	0.636089	0.0698493	4.0486e-42	0.0978645	0.766824	0.127623	1.03713e-34	0.0573648	0.864186	0.0663802	1.50446e-51	Un0008	4570688	4621309	4596000	1005
ENSACAG00000000922	0.0271079	0.599546	0.0452141	2.03522e-76	0.0271071	0.575385	0.0471112	1.86291e-73	0.0270847	0.701635	0.0386023	3.76255e-88	2	31726260	31753920	31740090	1638
ENSACAG00000000923	0.0816248	0.588303	0.138746	1.24403e-12	0.107827	0.579652	0.186021	1.11437e-10	0.0833411	0.553276	0.150632	4.7387e-12	Un0022	1823986	1856464	1840225	414
ENSACAG00000000930	0.133108	0.917249	0.145116	2.48767e-31	0.126051	0.893006	0.141153	3.83216e-31	0.134064	0.952937	0.140685	5.17966e-32	Un0046	1007692	1032665	1020180	813
ENSACAG00000000931	0.166444	0.803824	0.207065	4.92197e-15	0.154887	0.992709	0.156025	6.88687e-20	0.14521	1.00764	0.144108	1.88987e-21	2	49140660	49208191	49174400	597
ENSACAG00000000933	0.116943	1.00573	0.116276	3.73532e-12	0.140206	1.14287	0.12268	3.49333e-12	0.131939	0.788575	0.167313	2.06885e-09	Un0749	96074	98567	97320.5	264
ENSACAG00000000935	0.100231	0.951892	0.105296	1.18808e-09	0.100347	1.54621	0.064899	1.73593e-13	0.116965	1.49924	0.0780159	9.49621e-13	3	86244216	86252466	86248341	204
ENSACAG00000000936	0.0451272	0.854049	0.0528391	2.6788e-28	0.0494881	1.06397	0.0465126	1.45164e-33	0.054343	1.11169	0.0488833	3.1536e-33	Un0259	587194	612449	599822	498
ENSACAG00000000939	0.191649	1.11132	0.172452	2.52843e-08	0.200442	1.15641	0.173331	1.08469e-07	0.260429	1.04649	0.24886	9.86919e-06	Un0443	201003	207339	204171	201
ENSACAG00000000940	0.20272	1.47481	0.137455	0.0112973	0.20272	1.47481	0.137455	0.0112973	0.823885	NA	NA	0.132112	Un0371	93504	100436	96970	39
ENSACAG00000000941	0.0449665	0.662885	0.0678345	4.50644e-51	0.0481089	0.823613	0.058412	3.09171e-60	0.0487615	0.772872	0.0630913	2.9389e-57	4	52527446	52637496	52582471	1101
ENSACAG00000000942	0.110278	0.82359	0.133899	4.2137e-12	0.0950317	0.938028	0.10131	3.19697e-14	0.102042	0.986629	0.103425	6.13604e-14	Un0749	86356	94655	90505.5	324
ENSACAG00000000944	0.0531166	0.462522	0.114841	1.75185e-13	0.0826656	0.468444	0.176469	1.54976e-10	0.246752	0.489415	0.504177	0.00256345	Un1700	506	13081	6793.5	408
ENSACAG00000000946	0.150904	0.772138	0.195437	9.71727e-05	0.167231	0.817886	0.204467	0.000516709	0.121615	1.26227	0.0963465	2.92284e-07	2	49223423	49249225	49236324	126
ENSACAG00000000947	0.0165867	0.487564	0.0340196	8.9017e-20	0.0199485	0.487564	0.0409147	5.25722e-19	0.104114	0.68879	0.151154	2.2593e-14	6	10823011	10846946	10835000	408
ENSACAG00000000948	0.0738093	0.844877	0.087361	1.68679e-37	0.0988119	0.854152	0.115684	6.92888e-33	0.206044	1.26945	0.162309	1.0906e-28	3	86179554	86209940	86194747	789
ENSACAG00000000949	0.167076	1.42243	0.117459	4.11642e-26	0.173699	1.07628	0.161389	3.95643e-19	0.174002	1.46923	0.118431	1.79368e-25	3	88396607	88432345	88414476	546
ENSACAG00000000951	0.0861822	0.650531	0.13248	8.07071e-29	0.0850314	0.782631	0.108648	6.06281e-36	0.0995493	0.777032	0.128115	9.79669e-33	5	67443946	67459559	67451800	927
ENSACAG00000000952	0.0437469	0.795168	0.0550159	8.76153e-28	0.0422902	0.979447	0.0431776	2.1462e-32	0.0480665	0.739234	0.065022	1.44708e-24	Un0336	181072	190424	185748	480
ENSACAG00000000953	0.0759358	0.811276	0.0936004	2.64032e-14	0.0783834	0.746245	0.105037	1.45061e-13	0.0711523	1.00956	0.0704788	1.06471e-17	6	35488354	35498142	35493248	306
ENSACAG00000000955	0.2105	0.877898	0.239777	3.47164e-10	0.220892	1.14507	0.192907	2.98624e-13	0.219427	1.37034	0.160126	5.78691e-16	4	70392295	70481471	70436883	429
ENSACAG00000000957	0.0600195	1.64183	0.0365565	8.9704e-53	0.0925043	1.73832	0.0532149	1.26137e-45	0.0644536	1.6931	0.0380684	2.29258e-52	Un0371	65962	73522	69742	642
ENSACAG00000000963	0.0737159	0.580714	0.12694	8.59249e-19	0.0901525	0.697413	0.129267	1.46761e-19	0.0855591	0.635361	0.134662	3.29834e-18	1	129281064	129329915	129305000	606
ENSACAG00000000965	0.0401372	0.541779	0.0740841	6.01175e-12	0.0345961	0.578136	0.0598408	2.8048e-13	0.0455704	0.515109	0.0884673	7.67265e-11	1	129151297	129207404	129179000	258
ENSACAG00000000969	0.0265335	0.471545	0.0562693	3.128e-24	0.0447588	0.53883	0.0830667	4.44276e-23	0.0379596	0.686758	0.0552736	2.95617e-31	3	85998626	86019561	86009100	606
ENSACAG00000000970	0.185265	1.15578	0.160295	7.71077e-20	0.189521	1.4801	0.128046	1.26897e-23	0.187925	1.64591	0.114177	4.87012e-26	Un0620	183327	201709	192518	537
ENSACAG00000000971	NA	0.645792	0	NA	0.00500145	0.627213	0.00797408	1.43567e-51	0.0389996	0.777381	0.0501679	1.30476e-44	3	30415055	30434293	30424674	783
ENSACAG00000000972	0.153699	1.41181	0.108866	1.28444e-21	0.170761	NA	NA	1.6325e-29	0.191946	NA	NA	1.00611e-28	Un0737	67127	76309	71718	426
ENSACAG00000000973	0.0851311	0.650783	0.130813	2.44638e-20	0.102706	0.633887	0.162026	4.08596e-17	0.0929466	0.657783	0.141303	1.90226e-19	1	235399565	235422186	235411000	561
ENSACAG00000000974	0.0117858	0.369674	0.0318817	1.84488e-16	0.0153914	0.489444	0.0314468	1.82012e-19	0.0237599	0.632668	0.037555	3.645e-23	4	68195934	68231662	68213798	438
ENSACAG00000000975	0.12518	0.699535	0.178948	4.4539e-44	0.166612	0.856741	0.194472	2.46482e-44	0.135718	0.827569	0.163996	1.24178e-50	1	220630602	220682767	220657000	1689
ENSACAG00000000976	0.120463	0.966932	0.124583	1.25142e-39	0.145287	1.08933	0.133372	9.06792e-39	0.146246	1.16038	0.126032	1.497e-41	Un0749	67070	68189	67629.5	1017
ENSACAG00000000977	0.181291	0.91858	0.19736	8.62144e-28	0.184688	0.801169	0.230523	1.44326e-22	0.184284	0.873337	0.211011	2.41848e-25	2	164385013	164406106	164396000	951
ENSACAG00000000978	0.0544215	0.495192	0.1099	2.82816e-19	0.0643118	0.528105	0.121778	1.61092e-19	0.0664204	0.531859	0.124883	2.80262e-19	2	42153882	42312813	42233300	636
ENSACAG00000000979	0.0297871	0.377166	0.0789761	5.42153e-22	0.0722273	0.494828	0.145964	6.92374e-19	0.0436418	0.448425	0.0973223	4.23457e-22	5	67388937	67427695	67408316	732
ENSACAG00000000985	0.0250567	0.697762	0.0359102	2.17957e-55	0.0222766	0.763411	0.0291804	3.53517e-61	0.0263735	0.82024	0.0321534	2.82435e-62	1	204368934	204372397	204371000	972
ENSACAG00000000986	0.0904937	0.840757	0.107634	5.19295e-24	0.0930031	0.983	0.0946115	2.90631e-27	0.0928806	0.934904	0.0993477	4.99334e-26	Un0305	97460	109595	103528	546
ENSACAG00000000991	0.0703735	1.70421	0.041294	5.63036e-61	0.0843201	2.14237	0.0393583	6.42477e-63	0.079249	2.19911	0.0360369	7.4135e-64	Un0581	103683	111200	107442	756
ENSACAG00000000992	0.148584	1.46838	0.101189	3.38031e-12	0.155166	1.19316	0.130046	3.80356e-10	0.167818	0.906536	0.18512	7.06373e-08	Un0231	5917	9674	7795.5	216
ENSACAG00000000999	0.0449879	0.581029	0.077428	4.27005e-13	0.0493504	0.692999	0.0712128	7.68937e-15	0.040622	0.722811	0.0562001	1.57399e-16	1	126676458	126687300	126681879	306
ENSACAG00000001000	0.0992194	0.546172	0.181663	8.74412e-15	0.0929746	0.540017	0.17217	7.49333e-15	0.0992505	0.626187	0.1585	1.60224e-17	Un0003	9000407	9001133	9000770	594
ENSACAG00000001002	0.0818227	1.27422	0.0642137	2.68528e-49	0.102726	0.594369	0.172833	1.97499e-20	0.111018	0.832383	0.133374	1.73955e-29	Un0112	1645443	1646451	1645947	825
ENSACAG00000001003	0.188316	0.825018	0.228257	1.69607e-17	0.218347	0.780759	0.27966	8.3338e-14	0.227717	0.955315	0.238368	1.29796e-17	Un0199	76258	128702	102480	747
ENSACAG00000001005	0.00640248	1.75153	0.00365536	2.85731e-26	0.0128495	2.00046	0.00642326	4.44747e-26	0.0128424	1.78047	0.00721291	3.87815e-25	Un0737	105388	113090	109239	210
ENSACAG00000001008	NA	0.0215732	0	NA	0.28054	0.910692	0.308052	0.000360459	0.114406	0.227028	0.50393	0.0817455	5	74839793	74851337	74845565	204
ENSACAG00000001014	0.0424248	0.69642	0.0609184	1.62718e-18	0.0717863	0.553988	0.129581	1.64551e-11	0.222951	0.773256	0.288327	4.01783e-07	Un0748	963	31399	16181	324
ENSACAG00000001020	0.126898	0.685875	0.185016	1.02766e-08	0.16113	0.518829	0.310564	7.46685e-05	0.166877	0.610794	0.273212	9.33284e-06	Un0440	40292	42818	41555	279
ENSACAG00000001021	0.0163207	0.880004	0.0185462	1.03465e-41	0.0234116	0.883343	0.0265034	3.40823e-39	0.0233692	1.13791	0.0205369	2.13845e-46	Un0018	1855672	1873807	1864740	561
ENSACAG00000001024	0.156333	0.933286	0.167509	1.09398e-15	0.166799	1.11776	0.149225	2.73439e-18	0.161133	1.07236	0.150259	1.25599e-17	Un0336	62342	72968	67655	432
ENSACAG00000001025	0.187067	0.685063	0.273065	4.34077e-07	0.213185	0.873437	0.244076	2.80503e-08	0.225827	0.792546	0.284939	5.53354e-07	2	49343465	49355994	49349700	351
ENSACAG00000001026	0.0149113	0.405079	0.0368108	9.26903e-08	0.022567	0.69177	0.0326221	2.91177e-11	0.0148877	0.652039	0.0228325	1.83889e-11	2	49377321	49400518	49388900	177
ENSACAG00000001027	0.0899935	NA	NA	NA	0.0899935	NA	NA	NA	1.20089	5.1018	0.235385	0.350128	Un0371	28660	61017	44838.5	30
ENSACAG00000001028	0.0697406	0.98222	0.071003	5.10541e-09	0.0983583	1.33601	0.0736208	8.32749e-10	0.0794888	0.753006	0.105562	5.78e-07	Un0741	82010	107943	94976.5	153
ENSACAG00000001031	0.0464153	0.427081	0.10868	1.63005e-35	0.0504844	0.467636	0.107956	8.06823e-38	0.0552604	0.474629	0.116429	2.98956e-37	3	186371881	186396636	186384000	1323
ENSACAG00000001032	0.0686725	1.00607	0.0682583	5.0114e-22	0.0706322	1.41852	0.0497927	2.52996e-28	0.062959	1.84416	0.0341397	2.91535e-33	3	202284668	202296346	202290507	378
ENSACAG00000001036	0.0585241	0.515999	0.113419	1.28591e-30	0.0763449	0.550794	0.138609	2.20943e-28	0.0740673	0.602961	0.122839	1.05686e-31	Un0038	1670702	1673086	1671894	969
ENSACAG00000001039	0.0804534	1.31219	0.0613123	2.33106e-33	0.101764	1.28944	0.0789213	7.76411e-29	0.177226	1.9104	0.092769	2.8124e-27	Un0283	592788	603101	597944	504
ENSACAG00000001040	0.0478571	0.666429	0.0718113	1.19738e-43	0.0550268	0.903858	0.06088	3.03631e-55	0.0514206	0.843335	0.0609729	8.58341e-54	2	49499758	49545416	49522587	1020
ENSACAG00000001044	0.0406411	0.536303	0.0757801	2.67558e-29	0.0406344	0.681552	0.0596204	4.22361e-37	0.120252	0.688097	0.17476	1.11562e-20	1	126546386	126600869	126574000	765
ENSACAG00000001045	0.155934	1.63557	0.0953394	9.38674e-15	0.157494	4.65379	0.033842	1.02623e-17	0.15755	2.69217	0.0585216	8.70195e-17	Un0090	1470213	1470832	1470520	273
ENSACAG00000001048	0.034299	0.756718	0.0453261	2.71851e-18	0.0390154	0.97908	0.039849	1.72535e-21	0.041195	0.980087	0.042032	2.48745e-20	2	73157191	73173361	73165276	294
ENSACAG00000001050	0.0221427	0.702972	0.0314988	3.59415e-38	0.0307182	1.44725	0.0212253	1.05393e-59	0.0377083	1.04721	0.0360084	1.24881e-46	Un0103	966731	978156	972444	651
ENSACAG00000001052	0.0347834	0.44229	0.0786439	2.32728e-20	0.128999	0.586562	0.219924	1.18744e-12	0.0466932	0.444507	0.105045	5.68094e-17	2	31523286	31553887	31538600	573
ENSACAG00000001058	0.032322	0.924829	0.0349491	9.0367e-37	0.0554555	0.96226	0.0576305	3.71605e-32	0.043726	0.954719	0.0457998	3.15491e-35	Un1144	1784	43051	22417.5	537
ENSACAG00000001059	0.225655	1.05595	0.2137	7.21644e-17	0.258188	0.77157	0.334627	1.74115e-09	0.252968	0.868089	0.291408	1.34199e-11	Un0418	286780	306880	296830	612
ENSACAG00000001061	0.126957	0.489323	0.259454	0.000308446	0.118902	0.585768	0.202985	3.86784e-05	0.11852	0.648181	0.18285	3.91424e-06	Un0418	312694	316602	314648	192
ENSACAG00000001063	0.00434336	1.31617	0.00329999	1.09333e-31	0.0174733	1.70484	0.0102492	1.56599e-31	0.10116	1.97961	0.0511012	6.04038e-23	Un0193	687401	694400	690900	297
ENSACAG00000001067	0.0826152	0.820304	0.100713	3.98022e-40	0.0884463	0.991832	0.0891746	5.72888e-46	0.0963906	0.927691	0.103904	2.95498e-41	1	235374915	235391934	235383000	927
ENSACAG00000001070	0.0416804	0.765964	0.0544156	0.00906329	0.0416804	0.490302	0.0850096	0.0396835	0.641106	NA	NA	5.63452e-05	Un0280	420715	487336	454026	33
ENSACAG00000001073	0.121101	0.907564	0.133435	2.55461e-53	0.211091	1.07625	0.196136	8.51688e-41	0.1429	0.97872	0.146007	1.66635e-51	Un0347	229805	239102	234454	1392
ENSACAG00000001074	0.189161	0.714217	0.264851	5.03992e-28	0.2166	0.750407	0.288643	7.7471e-26	0.223956	0.854165	0.262193	1.65893e-30	Un0578	62729	64685	63707	1614
ENSACAG00000001080	0.159288	0.804471	0.198004	7.29932e-55	0.168247	0.961151	0.175048	3.33622e-65	0.167684	0.901086	0.186092	5.96632e-61	1	236826315	236852908	236840000	2223
ENSACAG00000001081	0.0942579	1.89771	0.0496694	9.91154e-73	0.110802	3.15873	0.0350779	3.43211e-77	0.113843	2.80523	0.0405824	9.3036e-75	Un0368	1331	9912	5621.5	972
ENSACAG00000001082	0.120036	1.02633	0.116957	6.44623e-08	0.115326	0.897207	0.128539	1.15923e-07	0.643041	NA	NA	2.78552e-07	Un0098	383166	399610	391388	171
ENSACAG00000001084	0.107154	0.913246	0.117333	1.90082e-15	0.103308	0.972531	0.106226	9.25885e-17	0.102685	0.975939	0.105217	1.04533e-16	Un0038	1723996	1763566	1743781	354
ENSACAG00000001085	0.0726443	0.634153	0.114553	2.88298e-20	0.0805526	0.75717	0.106386	5.0579e-23	0.0805444	0.802428	0.100376	2.26633e-24	Un0578	144838	157783	151310	543
ENSACAG00000001089	0.00223307	0.771396	0.00289485	7.09774e-45	0.00223135	0.650332	0.00343109	9.99038e-40	0.00672188	0.705236	0.0095314	1.55001e-39	1	88909848	88940115	88925000	573
ENSACAG00000001095	0.147705	0.637095	0.231842	2.70542e-09	0.161615	0.677706	0.238473	2.61197e-09	0.13885	0.745562	0.186236	1.02385e-11	Un1450	22786	27307	25046.5	396
ENSACAG00000001096	0.0204342	2.39404	0.00853543	2.76411e-31	0.0283122	NA	NA	8.69055e-38	0.0257394	NA	NA	9.44495e-39	Un0231	35701	73204	54452.5	261
ENSACAG00000001097	0.0844203	0.793828	0.106346	0.000252297	0.0675163	1.80567	0.0373913	1.27537e-07	0.0675642	2.85604	0.0236566	1.61871e-08	3	202240802	202241881	202241000	81
ENSACAG00000001098	0.0141979	0.719278	0.0197392	1.3561e-18	0.0141718	1.25827	0.0112629	1.33372e-26	0.0286513	1.24511	0.023011	8.06062e-24	3	202192842	202221488	202207165	276
ENSACAG00000001099	0.0879386	2.31916	0.0379183	2.01052e-15	0.104343	NA	NA	1.76932e-17	0.108908	NA	NA	9.32296e-18	5	89977413	89989627	89983520	177
ENSACAG00000001100	0.0376707	0.774566	0.0486346	1.82814e-24	0.0457186	0.793144	0.0576423	4.22047e-24	0.0554984	1.07655	0.051552	1.17e-28	2	73136925	73149357	73143141	426
ENSACAG00000001105	0.0302542	0.521279	0.0580384	1.22145e-17	0.0392635	0.849914	0.046197	4.85845e-26	0.0199988	0.794461	0.0251729	5.88054e-28	1	220522362	220545443	220534000	402
ENSACAG00000001106	0.074324	0.898316	0.082737	3.47161e-35	0.0807739	0.930813	0.0867778	5.80782e-35	0.0924061	0.946687	0.09761	1.14216e-33	Un0418	321012	330348	325680	693
ENSACAG00000001107	0.113761	0.719347	0.158145	4.67181e-07	0.129076	0.966303	0.133577	1.54188e-08	0.234193	1.01007	0.23186	9.12719e-06	Un1166	54349	56844	55596.5	189
ENSACAG00000001108	0.0655163	1.29111	0.0507441	1.95946e-25	0.0951159	1.16778	0.0814503	2.02277e-20	0.101604	1.0363	0.0980449	1.90046e-17	Un0286	162211	186112	174162	345
ENSACAG00000001109	0.0817167	1.51072	0.0540911	6.1491e-58	0.107489	1.25742	0.0854838	3.63675e-45	0.0807153	1.5637	0.0516181	1.93092e-58	Un0435	380396	391418	385907	843
ENSACAG00000001110	0.0254437	0.969576	0.026242	0.000163789	0.0254679	0.96291	0.0264489	0.000168186	0.742054	1.02676	0.722713	0.49856	1	129099162	129110689	129105000	51
ENSACAG00000001111	0.0530092	1.25988	0.0420749	3.55468e-97	0.0473468	1.38232	0.0342516	7.50471e-106	0.087071	1.23743	0.0703645	4.65661e-79	Un0581	142573	184524	163548	1338
ENSACAG00000001114	0.0758487	0.602856	0.125815	6.54959e-16	0.0660642	0.433869	0.152267	7.77922e-12	0.0692488	0.487561	0.142031	3.44143e-13	Un0112	1488887	1492629	1490758	438
ENSACAG00000001115	0.200823	0.854828	0.234928	0.00391751	0.23176	0.475332	0.487575	0.137629	0.220268	0.629351	0.349992	0.0423705	Un0803	138292	143216	140754	84
ENSACAG00000001116	0.213601	0.762084	0.280285	3.93532e-06	0.210705	1.11685	0.18866	1.14462e-09	0.304494	0.793054	0.383952	0.000230086	Un0204	960523	963805	962164	288
ENSACAG00000001118	0.292892	1.01056	0.289831	1.56279e-09	0.262871	0.8633	0.304496	1.94783e-08	0.238298	0.869442	0.274081	8.07306e-10	Un0058	1345133	1355050	1350090	462
ENSACAG00000001121	0.100587	1.06889	0.0941043	1.12606e-30	0.124838	1.08471	0.115089	5.72053e-27	0.139104	1.10809	0.125535	4.12138e-26	6	10693322	10695851	10694600	594
ENSACAG00000001123	0.0724716	0.635644	0.114013	6.30628e-16	0.0871838	0.566314	0.15395	1.30335e-12	0.104166	0.693335	0.15024	9.22626e-15	1	128977539	129009311	128993425	411
ENSACAG00000001128	0.0100893	1.0267	0.00982699	2.05425e-22	0.043741	0.943481	0.0463613	5.76271e-17	0.0516294	0.990442	0.0521276	5.95363e-16	Un0336	17851	21612	19731.5	255
ENSACAG00000001130	0.0662036	0.448159	0.147724	1.63231e-18	0.0761154	0.47147	0.161443	1.26354e-17	0.066944	0.51736	0.129395	2.83327e-22	1	222273425	222302502	222288000	708
ENSACAG00000001134	0.0125451	0.449647	0.0278998	2.7007e-29	0.0167678	0.52366	0.0320204	7.23296e-32	0.0157257	0.477818	0.0329114	1.77085e-30	1	220156105	220199549	220177827	639
ENSACAG00000001138	0.0398102	1.04373	0.0381422	8.56424e-55	0.0540636	1.11294	0.0485774	3.14959e-52	0.166114	2.58202	0.064335	4.04739e-48	Un0272	695101	700742	697922	780
ENSACAG00000001142	0.120159	0.671414	0.178963	7.36108e-11	0.152666	0.708618	0.215442	1.53856e-09	0.162893	0.699818	0.232764	2.16257e-08	1	220109723	220138088	220124000	375
ENSACAG00000001143	0.0252495	1.82466	0.0138379	2.56904e-46	0.0675782	1.41498	0.047759	3.55601e-30	0.019172	1.20367	0.015928	7.85875e-40	Un1605	3669	23794	13731.5	441
ENSACAG00000001144	0.0202634	0.531571	0.0381199	9.93352e-30	0.0182236	0.604839	0.0301297	3.22068e-34	0.0182094	0.639765	0.0284627	7.15516e-36	Un0031	1387676	1391837	1389760	642
ENSACAG00000001147	0.208505	0.999523	0.208604	5.9169e-15	0.24337	1.12566	0.216202	1.59639e-14	0.250785	1.03289	0.242799	1.03187e-12	Un0429	30862	49325	40093.5	534
ENSACAG00000001148	0.0918071	0.531124	0.172854	1.14952e-41	0.127928	0.716057	0.178656	1.42615e-47	0.14483	0.649365	0.223034	9.11084e-37	4	52783717	52828842	52806300	1899
ENSACAG00000001151	0.00440587	0.0426477	0.103308	0.00325373	0.00995276	0.0317267	0.313703	0.0713398	0.00660391	0.0429545	0.153742	0.00755028	4	95512691	95535872	95524300	600
ENSACAG00000001152	0.0199691	0.796857	0.0250598	2.52297e-17	0.0457919	0.604859	0.0757067	4.28468e-11	0.040556	0.738027	0.0549519	8.32238e-14	Un0018	2023627	2034399	2029013	258
ENSACAG00000001154	0.16258	0.772324	0.210508	1.56442e-34	0.192571	0.729772	0.263878	2.8407e-26	0.205498	0.83771	0.245309	2.22947e-30	4	70591886	70606702	70599294	1482
ENSACAG00000001156	0.0100345	0.681987	0.0147136	1.00348e-55	0.0115909	0.764112	0.0151692	1.22044e-59	0.00847393	0.896087	0.00945658	4.82001e-69	1	30267922	30272227	30270100	843
ENSACAG00000001160	0.081361	0.584443	0.139211	8.46559e-14	0.102872	0.741048	0.13882	4.19185e-15	0.11944	0.724819	0.164786	2.93687e-13	1	25699075	25730719	25714897	441
ENSACAG00000001161	0.0983706	1.10339	0.0891532	1.02526e-35	0.117398	1.00906	0.116344	2.83118e-29	0.130502	1.13615	0.114863	3.59065e-31	4	70676378	70677077	70676700	666
ENSACAG00000001165	0.0196069	0.569569	0.0344241	5.63436e-34	0.0153769	0.720688	0.0213364	4.36908e-43	0.0159129	0.616899	0.0257951	3.06904e-38	Un0271	521084	556078	538581	645
ENSACAG00000001166	0.0433201	0.502418	0.0862231	3.6007e-26	0.097016	0.647957	0.149726	2.19774e-22	0.0543681	0.535925	0.101447	2.446e-25	6	9651280	9661334	9656307	750
ENSACAG00000001167	0.0719237	2.32323	0.0309585	8.77717e-23	0.0610771	NA	NA	1.00116e-27	0.0609778	1.13174	0.0538796	2.36341e-17	Un6334	2100	4231	3165.5	252
ENSACAG00000001168	0.0421781	0.846572	0.0498223	8.07987e-13	0.0610205	0.780177	0.0782136	1.43754e-10	0.0675492	0.833455	0.0810473	8.85944e-11	3	85513146	85531311	85522200	216
ENSACAG00000001169	0.0894275	1.9782	0.0452066	4.63396e-27	0.165484	1.00041	0.165417	1.02458e-11	0.0952809	0.832823	0.114407	9.73596e-15	Un0722	70282	71041	70661.5	333
ENSACAG00000001171	0.122855	0.947994	0.129595	7.60566e-21	0.136235	0.911196	0.149512	3.36844e-18	0.135868	0.940046	0.144534	1.03095e-18	1	88894884	88908559	88901700	510
ENSACAG00000001172	0.0182735	1.61038	0.0113473	4.59524e-23	0.0245885	1.17003	0.0210153	4.97194e-19	0.19091	1.33516	0.142986	1.21909e-09	Un0722	79475	83133	81304	216
ENSACAG00000001173	0.129308	0.502161	0.257502	1.09356e-49	0.140621	0.58808	0.239118	2.89016e-58	0.135486	0.600512	0.225617	7.31361e-63	Un0038	2051236	2054749	2052990	3366
ENSACAG00000001174	0.0985627	0.504655	0.195307	9.25298e-14	0.132381	0.762745	0.173558	1.2852e-18	0.144427	0.624223	0.231372	1.10077e-13	Un0031	1313233	1336478	1324860	618
ENSACAG00000001175	0.0582353	0.974311	0.0597708	2.8092e-100	0.0679439	1.27285	0.0533792	1.2319e-114	0.0659728	1.17882	0.0559652	4.96464e-111	Un0862	51028	72385	61706.5	1677
ENSACAG00000001176	0.152978	1.40139	0.109162	7.12926e-29	0.170598	1.07296	0.158998	2.81221e-21	0.187978	0.720676	0.260836	3.08152e-12	Un0722	90472	120423	105448	594
ENSACAG00000001178	0.0555936	0.838281	0.0663186	9.12848e-69	0.0629802	0.871027	0.0723057	1.22898e-67	0.07785	1.03938	0.0749007	3.62206e-72	Un0011	2256803	2267500	2262150	1353
ENSACAG00000001181	0.0717922	1.32077	0.0543562	1.8707e-66	0.216184	1.5817	0.136679	7.72297e-40	0.0721974	0.945821	0.0763331	1.03367e-51	Un0308	2506	24177	13341.5	954
ENSACAG00000001183	0.0817013	0.424937	0.192267	5.73492e-14	0.0905438	0.560805	0.161453	3.69628e-18	0.0880791	0.563487	0.156311	2.04693e-18	1	242606269	242630524	242618000	717
ENSACAG00000001185	0.10369	0.700034	0.148122	5.13508e-33	0.108724	0.761162	0.142839	1.13695e-35	0.113658	0.888203	0.127964	2.28683e-40	2	42441899	42489385	42465642	1038
ENSACAG00000001186	0.0168337	0.518208	0.0324845	1.36271e-11	0.0168826	0.403255	0.0418659	2.53353e-09	0.0341615	0.591343	0.0577694	4.94276e-11	1	30018972	30040594	30029783	231
ENSACAG00000001187	0.0893375	0.744981	0.119919	1.04179e-11	0.111738	0.959293	0.116479	1.23742e-12	0.129097	0.752119	0.171644	2.13406e-09	Un0018	2128848	2135326	2132087	294
ENSACAG00000001188	NA	NA	NA	NA	0.511208	1.89179	0.270224	0.102021	NA	NA	NA	NA	3	70432109	70470451	70451280	39
ENSACAG00000001190	0.0963951	0.91361	0.10551	4.32677e-30	0.175065	1.00591	0.174036	3.8769e-22	0.138312	0.983792	0.14059	1.22661e-25	Un0252	277964	323012	300488	708
ENSACAG00000001192	0.065861	1.0324	0.0637943	1.49699e-16	0.085074	1.17103	0.0726486	1.18525e-15	0.0743036	1.12386	0.0661146	3.24974e-16	3	30332173	30412013	30372093	258
ENSACAG00000001194	0.059352	0.737401	0.0804881	8.80182e-24	0.057389	0.851233	0.0674186	7.54654e-27	0.0564302	0.892092	0.0632561	1.07937e-28	1	219997125	219998898	219998000	495
ENSACAG00000001199	0.0273483	0.636112	0.0429928	1.77988e-56	0.0303817	0.603579	0.0503358	2.14148e-52	0.0324341	0.632254	0.0512992	5.21348e-53	2	73070176	73099099	73084600	1035
ENSACAG00000001203	0.104389	0.821268	0.127107	5.39026e-24	0.132591	0.968009	0.136972	4.7654e-24	0.132567	0.969091	0.136796	4.52678e-24	1	243174238	243181493	243178000	630
ENSACAG00000001209	0.0481863	0.812959	0.0592727	1.58148e-32	0.0555061	0.759238	0.0731077	3.96095e-29	0.0555404	0.68358	0.0812493	2.42851e-26	3	51711250	51713703	51712500	591
ENSACAG00000001210	0.0177491	0.424253	0.041836	5.19069e-36	0.0226081	0.453462	0.0498566	9.00732e-37	0.0233126	0.431241	0.0540592	5.42807e-34	4	37907889	37942636	37925300	951
ENSACAG00000001215	0.138365	0.97071	0.14254	1.03568e-13	0.194759	2.02398	0.0962255	4.11814e-19	0.189054	1.42875	0.132321	1.03762e-15	Un0271	82022	86969	84495.5	357
ENSACAG00000001216	0.0490823	1.7004	0.0288652	5.26431e-47	0.0685852	1.50794	0.0454829	7.91753e-40	0.0709453	0.99761	0.0711153	1.43665e-29	Un0138	648418	649021	648720	561
ENSACAG00000001217	0.0485019	1.10927	0.043724	2.87457e-35	0.0470807	1.56942	0.0299987	1.35515e-42	0.0511639	1.5978	0.0320215	8.39622e-43	Un0435	332774	338137	335456	507
ENSACAG00000001219	0.00723869	0.59217	0.012224	7.22409e-43	0.0237368	0.827642	0.02868	2.04338e-46	0.0240974	0.851723	0.0282925	9.74372e-48	3	119080425	119184920	119133000	714
ENSACAG00000001220	0.218519	0.49643	0.440181	0.00117774	0.172889	0.646512	0.267418	2.72688e-07	0.144975	0.570463	0.254136	2.3397e-07	4	70775910	70779980	70777945	381
ENSACAG00000001222	NA	0.808587	0	NA	NA	1.13465	0	NA	NA	1.67393	0	NA	3	51634395	51643382	51638900	189
ENSACAG00000001223	0.0586023	1.06292	0.0551331	1.97958e-20	0.300217	1.26665	0.237016	3.79011e-08	0.0607966	1.10224	0.0551575	5.55489e-20	Un0138	671116	679718	675417	309
ENSACAG00000001225	0.104895	1.04486	0.100392	4.83775e-16	0.136661	1.04584	0.130671	4.4238e-14	0.137028	0.96869	0.141457	3.45178e-13	Un0545	201888	210269	206078	339
ENSACAG00000001226	0.0997009	1.17917	0.0845518	1.7778e-84	0.164169	3.71506	0.0441902	5.13677e-103	0.166311	2.20642	0.0753759	7.12185e-92	Un0336	7882	11758	9820	1605
ENSACAG00000001228	0.0124535	1.15366	0.0107947	2.35373e-25	0.0149923	2.7246	0.00550257	3.31738e-32	0.022587	NA	NA	1.84342e-33	Un0577	194561	198032	196296	261
ENSACAG00000001231	0.130635	0.462439	0.282493	4.90244e-06	0.159956	0.480434	0.332941	4.81207e-05	0.157556	0.535713	0.294106	3.1038e-06	Un0418	333466	333838	333652	354
ENSACAG00000001233	0.237325	1.09414	0.216905	1.04642e-07	0.258694	1.06078	0.243871	2.01262e-07	0.278484	0.992714	0.280528	2.65726e-06	Un0748	65642	68570	67106	246
ENSACAG00000001234	0.0743768	0.607172	0.122497	1.06982e-13	0.0724593	0.651619	0.111199	1.89944e-15	0.141399	0.733758	0.192705	5.94571e-11	1	236866142	236871876	236869009	402
ENSACAG00000001235	0.0944619	0.643353	0.146828	5.89386e-19	0.105633	0.569567	0.185462	8.42274e-15	0.22008	0.841205	0.261624	3.10458e-12	1	204307651	204336215	204321933	606
ENSACAG00000001236	0.0551352	1.00952	0.0546154	2.0852e-81	0.0851109	1.03623	0.0821353	2.70787e-69	0.0727245	1.02369	0.0710412	1.14001e-73	Un1296	2263	26645	14454	1305
ENSACAG00000001238	0.0234991	0.772009	0.030439	3.85039e-136	0.0336846	0.868286	0.0387944	1.72703e-137	0.0352096	1.0067	0.0349753	2.54067e-151	4	95733138	95741835	95737500	2268
ENSACAG00000001239	0.10401	0.665664	0.156249	5.44945e-11	0.112363	0.748324	0.150153	8.37155e-12	0.12155	0.813612	0.149395	2.74417e-12	Un0033	1845205	1868058	1856630	339
ENSACAG00000001240	0.0327484	1.34977	0.0242621	1.63598e-88	0.0901918	1.29842	0.0694627	1.33362e-62	0.0412183	1.22006	0.0337838	3.4851e-79	Un0418	342442	351742	347092	1023
ENSACAG00000001241	0.185206	0.727737	0.254495	1.69557e-11	0.199606	0.851437	0.234434	1.87839e-13	0.217526	0.814499	0.267067	3.29197e-11	Un4941	990	5619	3304.5	543
ENSACAG00000001243	0.0421039	3.00432	0.0140145	1.33011e-30	0.0627586	1.64163	0.0382295	1.91907e-23	0.0569585	1.22764	0.0463969	9.95296e-21	Un0577	203790	214132	208961	285
ENSACAG00000001244	0.0307241	0.499634	0.0614932	7.93796e-08	0.0384911	0.797263	0.0482791	7.02248e-11	0.0465566	0.858198	0.0542493	5.95825e-11	3	51578859	51623448	51601200	174
ENSACAG00000001245	0.212112	0.763976	0.277642	1.87811e-31	0.244411	0.849537	0.287699	5.5438e-31	0.332208	1.00083	0.331932	1.08305e-25	4	70978454	71007156	70992805	1827
ENSACAG00000001250	0.0271991	0.790178	0.0344214	2.25402e-37	0.0272013	0.857878	0.0317077	7.66437e-40	0.0271808	1.18687	0.0229012	1.30808e-49	4	71042560	71062810	71052685	600
ENSACAG00000001252	0.0645299	0.693746	0.0930166	2.31571e-92	0.0758285	0.844557	0.089785	4.71304e-104	0.0872739	0.89739	0.097253	1.58669e-103	2	49612128	49638674	49625401	2367
ENSACAG00000001253	0.126179	0.549408	0.229664	1.36852e-12	0.133082	0.715362	0.186034	3.05544e-17	0.138911	0.678788	0.204646	4.06634e-15	1	219636190	219648176	219642183	630
ENSACAG00000001255	0.0621094	0.791047	0.0785154	1.06683e-29	0.0730339	0.944877	0.0772946	2.13768e-33	0.0763557	0.999921	0.0763617	1.37228e-33	Un0031	1068760	1069447	1069100	615
ENSACAG00000001257	0.0560346	0.679396	0.0824771	4.69733e-16	0.0784831	0.725192	0.108224	3.88977e-14	0.103177	0.64913	0.158946	1.31346e-10	2	49715215	49724074	49719600	348
ENSACAG00000001258	0.176313	0.837947	0.210411	0.000116051	0.259405	1.2164	0.213257	4.7807e-05	0.168302	1.2371	0.136046	4.23145e-07	Un0748	91145	91814	91479.5	135
ENSACAG00000001260	0.0934541	0.541544	0.17257	2.18774e-20	0.103772	0.546843	0.189765	6.20818e-19	0.105943	0.615229	0.172202	6.02148e-22	1	182418767	182444916	182432000	831
ENSACAG00000001262	0.129062	0.912238	0.141479	1.32706e-45	0.153014	0.974532	0.157013	7.17112e-43	0.154189	0.902563	0.170834	8.40832e-39	Un0545	168876	186017	177446	1284
ENSACAG00000001263	0.156966	0.750969	0.209018	4.88385e-06	0.156746	0.697588	0.224697	1.36846e-05	0.143454	0.853014	0.168174	6.19732e-07	Un0271	71960	79049	75504.5	183
ENSACAG00000001264	0.00928925	1.15193	0.0080641	1.14984e-28	0.108185	0.7787	0.138931	6.48946e-12	0.00930214	0.831119	0.0111923	1.93287e-23	Un0748	104794	117990	111392	288
ENSACAG00000001266	0.00708227	0.563515	0.012568	4.62124e-50	0.0539006	0.814831	0.0661495	2.20862e-43	0.0354442	0.855251	0.041443	1.04581e-51	Un0046	979171	1002415	990793	834
ENSACAG00000001268	0.132839	0.73408	0.18096	1.98286e-05	0.183405	0.764853	0.239791	0.000354967	0.143799	0.586219	0.245299	0.000515759	Un0009	706164	711688	708926	144
ENSACAG00000001269	0.0246008	0.294843	0.083437	9.04634e-11	0.0230422	0.302257	0.0762338	6.64291e-12	0.0292736	0.35102	0.0833959	9.08509e-13	Un0031	861338	919055	890196	429
ENSACAG00000001274	0.0163652	1.1957	0.0136867	9.0922e-27	0.0362022	1.69358	0.0213761	9.76585e-29	0.0142779	1.10009	0.0129788	6.81316e-27	Un0009	691040	699226	695133	309
ENSACAG00000001282	0.0799434	1.03163	0.0774925	3.44256e-39	0.0743319	1.07636	0.0690585	1.04691e-41	0.18248	1.16034	0.157264	1.36943e-26	1	88879872	88894493	88887200	771
ENSACAG00000001285	0.222335	0.934865	0.237826	1.303e-76	0.242953	1.00408	0.241966	5.15266e-76	0.242669	0.978443	0.248016	4.64262e-73	1	222338197	222366674	222352000	3507
ENSACAG00000001286	0.0157113	1.01424	0.0154907	2.18136e-43	0.0236518	0.964565	0.0245207	3.73226e-39	0.0236707	0.931266	0.0254177	3.11568e-38	5	66925164	66925674	66925419	510
ENSACAG00000001288	0.0479483	0.618263	0.0775532	4.19412e-83	0.0502117	0.749471	0.0669962	6.45517e-98	0.051245	0.81082	0.0632014	5.25493e-104	4	95807079	95812025	95809552	2061
ENSACAG00000001289	0.0908542	0.497632	0.182573	6.57199e-34	0.0887983	0.557959	0.159148	4.43191e-40	0.0864449	0.533071	0.162164	9.85925e-39	1	219569473	219627846	219599000	1635
ENSACAG00000001290	1.09647	NA	NA	3.21199e-05	0.0550213	NA	NA	3.10089e-39	0.22206	NA	NA	5.68022e-16	Un0565	192568	207622	200095	246
ENSACAG00000001291	0.0836377	0.973466	0.0859174	5.63098e-55	0.0862725	1.13149	0.0762468	2.1183e-61	0.0860237	1.15452	0.0745105	2.67406e-62	2	72777086	72799516	72788301	1107
ENSACAG00000001293	0.134962	0.431008	0.313131	0.00670256	0.328579	0.635952	0.516673	0.0686132	0.118131	0.838349	0.140909	3.60631e-07	Un0030	2355018	2358082	2356550	153
ENSACAG00000001296	0.0585105	0.611684	0.0956549	5.00106e-23	0.0738668	0.762733	0.0968449	2.27309e-26	0.0798839	0.714228	0.111847	3.53514e-23	Un0286	199292	216018	207655	603
ENSACAG00000001297	0.035232	0.627995	0.0561024	1.51406e-10	0.0947784	0.648733	0.146098	1.25916e-07	0.062956	0.889261	0.0707958	2.72484e-12	Un0033	1964053	1969720	1966890	219
ENSACAG00000001298	0.0157384	0.838865	0.0187615	3.7823e-57	0.0313882	1.0289	0.0305066	4.55369e-59	0.0254338	1.05374	0.0241368	2.78482e-62	Un0103	805867	815862	810864	768
ENSACAG00000001299	0.0895303	0.576478	0.155306	1.70286e-21	0.0859168	0.738749	0.1163	1.83408e-29	0.0867533	0.662874	0.130875	2.14303e-26	4	95850882	95874772	95862827	807
ENSACAG00000001300	0.163944	0.602912	0.271921	3.0847e-12	0.186304	0.749754	0.248487	1.25823e-14	0.185766	0.834362	0.222645	4.30878e-17	5	112145959	112171893	112158926	720
ENSACAG00000001301	0.195148	0.83375	0.234061	1.14179e-13	0.249549	1.02165	0.244261	1.0988e-13	0.257635	0.904576	0.284813	6.6911e-11	5	66752112	66833352	66792732	567
ENSACAG00000001302	0.0679788	0.351924	0.193163	4.84839e-19	0.06645	0.376703	0.176399	3.2174e-21	0.0657017	0.400696	0.163969	7.75902e-23	4	37884321	37893642	37889000	1077
ENSACAG00000001307	0.0188998	0.472453	0.0400035	8.30524e-29	0.0208345	0.508433	0.0409778	3.29187e-30	0.0169895	0.424215	0.0400492	1.25645e-26	Un0033	2100071	2147128	2123600	687
ENSACAG00000001313	0.0239933	0.749634	0.0320067	1.18382e-46	0.0345907	0.804031	0.0430216	3.28115e-45	0.0214059	0.870863	0.0245801	1.19964e-54	Un0142	803575	815496	809536	768
ENSACAG00000001318	0.102466	0.892092	0.11486	2.29075e-09	0.239129	1.83401	0.130386	7.66701e-09	0.261257	0.69038	0.378424	0.00305417	Un0030	2452836	2456305	2454570	186
ENSACAG00000001319	0.135016	1.56511	0.0862658	4.91128e-19	0.144369	1.39966	0.103146	5.21146e-17	0.112126	1.38345	0.0810485	1.4779e-19	Un0193	737242	747004	742123	327
ENSACAG00000001320	0.144668	0.79282	0.182473	1.60999e-15	0.156728	0.829019	0.189052	2.28565e-15	0.179543	0.884088	0.203083	1.35185e-14	4	53184112	53188636	53186374	513
ENSACAG00000001323	0.191948	1.00005	0.191938	2.96832e-08	0.335117	0.735712	0.455501	0.00712723	0.247907	0.804779	0.308043	4.24706e-05	4	53194281	53203846	53199100	246
ENSACAG00000001324	0.105352	0.493187	0.213614	4.945e-10	0.118394	0.43871	0.269868	1.61063e-07	0.118414	0.472216	0.250762	2.89184e-08	1	25332658	25355081	25343900	501
ENSACAG00000001325	0.109452	1.62935	0.0671756	4.21816e-63	0.13224	1.54569	0.085554	6.44196e-56	0.144945	1.57696	0.0919138	1.51097e-53	Un1614	20248	21304	20776	981
ENSACAG00000001328	0.0704124	0.625377	0.112592	1.44722e-35	0.0682754	0.671243	0.101715	1.58954e-38	0.147089	0.799764	0.183915	5.11707e-28	Un0545	30387	112534	71460.5	1005
ENSACAG00000001330	0.0871443	0.678577	0.128422	2.4746e-08	0.0905747	0.895548	0.101139	5.63995e-10	0.101307	0.842473	0.12025	1.79297e-09	Un0138	682115	720932	701524	210
ENSACAG00000001333	0.0560747	1.61109	0.0348053	2.22605e-45	0.0629011	NA	NA	7.18702e-58	0.0786182	2.82063	0.0278726	2.49844e-49	Un0231	77304	158800	118052	537
ENSACAG00000001335	NA	1.20888	0	NA	0.00334003	1.22006	0.00273759	1.27781e-41	0.00668057	1.13614	0.00588008	1.3567e-38	Un0435	322865	323393	323129	393
ENSACAG00000001337	NA	0.567802	0	NA	0.0105976	0.725104	0.0146152	3.63625e-09	0.0105781	0.732782	0.0144355	3.27505e-09	1	126524249	126530358	126527000	123
ENSACAG00000001338	NA	0.801771	0	NA	NA	0.866883	0	NA	NA	0.924259	0	NA	Un0633	74336	84296	79316	219
ENSACAG00000001339	0.0737605	0.923961	0.0798307	9.27676e-14	0.155038	1.66546	0.0930901	2.88745e-14	0.0814259	1.03323	0.0788074	5.68434e-15	Un3921	2394	6418	4406	270
ENSACAG00000001341	0.112494	0.382069	0.294434	0.000163994	0.121677	0.430151	0.28287	2.76193e-05	0.116736	0.42505	0.27464	2.67181e-05	3	146650465	146657416	146654000	297
ENSACAG00000001343	0.0469674	0.653456	0.0718754	5.92388e-12	0.0414983	0.912413	0.0454819	2.24043e-16	0.0361837	0.855259	0.0423073	3.42237e-16	3	186492776	186494832	186493804	255
ENSACAG00000001344	0.0846883	0.49283	0.171841	4.00151e-05	0.0943308	0.542654	0.173832	2.51408e-05	0.0798626	0.704898	0.113297	6.54806e-07	1	245388451	245409642	245399000	156
ENSACAG00000001347	0.041033	0.510397	0.0803944	4.46739e-22	0.067066	0.561525	0.119436	1.28686e-19	0.0617178	0.500327	0.123355	9.52872e-18	Un0286	270649	283862	277256	597
ENSACAG00000001348	0.0119544	0.536489	0.0222826	1.88262e-11	0.0271704	0.60903	0.0446126	1.43162e-11	0.0119175	0.545802	0.0218349	1.47688e-11	3	51363689	51407011	51385350	213
ENSACAG00000001349	0.0512084	0.898876	0.0569693	7.12528e-20	0.0532413	1.06986	0.0497648	4.48582e-23	0.0575972	1.20859	0.0476566	1.37921e-24	1	88840387	88851470	88845900	339
ENSACAG00000001352	0.0243823	0.588527	0.0414294	3.62118e-40	0.0218181	0.595028	0.0366674	6.17238e-41	0.0295532	0.646518	0.0457113	1.37104e-41	5	65732240	65766339	65749300	792
ENSACAG00000001358	0.052608	0.92355	0.0569628	7.23172e-61	0.045311	0.921985	0.049145	1.93619e-63	0.0453745	1.21435	0.0373653	1.09433e-77	Un0103	769625	772164	770894	1041
ENSACAG00000001359	0.140051	0.705924	0.198393	3.41345e-67	0.167398	0.762451	0.219552	1.34496e-62	0.157336	0.751249	0.209433	2.21922e-65	4	53239303	53245855	53242579	2811
ENSACAG00000001360	0.0703637	0.503801	0.139666	1.93001e-17	0.0506685	0.597992	0.0847311	9.34291e-25	0.0506685	0.537422	0.0942806	4.371e-22	3	106757006	106774299	106766000	651
ENSACAG00000001361	0.0276199	1.54415	0.0178868	9.84566e-149	0.0276564	1.52172	0.0181744	2.9383e-147	0.0275966	1.28511	0.0214742	3.83419e-135	Un0275	770294	776112	773203	1563
ENSACAG00000001362	NA	0.721498	0	NA	NA	0.845537	0	NA	0.0100798	0.886769	0.0113669	2.82541e-17	4	95890774	95907992	95899383	195
ENSACAG00000001363	0.0449531	0.744715	0.0603629	1.88554e-62	0.0511794	0.73516	0.0696167	3.23461e-58	0.0483792	0.787156	0.0614607	4.18174e-64	1	182399767	182412659	182406213	1236
ENSACAG00000001365	0.176194	0.836244	0.210697	9.296e-10	0.148352	1.39094	0.106656	3.9519e-18	0.196493	1.29094	0.152209	3.50357e-14	Un0827	52984	72848	62916	351
ENSACAG00000001371	0.122983	0.764412	0.160886	1.76992e-20	0.124859	0.705919	0.176875	2.69295e-18	0.149141	0.749588	0.198964	3.20989e-17	1	235264724	235276544	235270634	654
ENSACAG00000001373	0.0857239	0.97822	0.0876325	4.23064e-25	0.148766	0.831905	0.178825	4.61947e-15	0.139077	1.12816	0.123278	2.64886e-22	Un0011	2379563	2388905	2384234	519
ENSACAG00000001377	0.00325522	0.589974	0.00551756	1.22619e-25	0.00652913	0.666144	0.00980138	7.7479e-27	0.0500523	0.794572	0.0629927	6.30571e-22	1	222599010	222630503	222615000	396
ENSACAG00000001379	0.0465028	0.942365	0.0493469	2.26926e-65	0.0446189	0.61303	0.0727841	1.71833e-44	0.0489765	0.584012	0.0838621	7.30891e-41	Un0722	125072	126928	126000	1038
ENSACAG00000001382	0.038274	1.16613	0.0328213	1.48749e-10	0.0439047	0.70749	0.062057	1.11354e-06	0.0551419	0.718919	0.0767011	2.88532e-06	Un0633	104228	113901	109064	120
ENSACAG00000001386	0.122215	0.691968	0.176619	4.84253e-13	0.137318	0.704409	0.19494	3.72765e-12	0.126434	0.752827	0.167946	4.06277e-14	Un0031	403264	433458	418361	426
ENSACAG00000001387	0.039276	0.851235	0.04614	1.38111e-06	0.0234439	1.56939	0.0149383	5.64519e-10	0.178164	NA	NA	0	Un0722	137249	145095	141172	84
ENSACAG00000001388	0.0874884	0.93452	0.0936185	6.27061e-15	0.220312	0.990268	0.222477	3.38427e-08	0.174358	1.62795	0.107103	5.26408e-15	Un0812	44618	46446	45532	270
ENSACAG00000001389	NA	0.385055	0	NA	0.0132837	0.46595	0.0285089	7.88249e-10	0.0132837	0.426627	0.0311366	4.08672e-09	2	31445364	31452735	31449000	198
ENSACAG00000001390	0.0732371	1.11226	0.0658454	7.39169e-14	0.0607901	1.67896	0.0362071	7.79348e-19	0.0669389	1.74624	0.0383331	1.70153e-18	3	202049657	202065484	202058000	222
ENSACAG00000001391	0.0656865	0.564875	0.116285	2.69205e-06	0.0655217	0.766518	0.0854797	2.58042e-08	0.0745296	0.557286	0.133737	7.07902e-06	1	24881738	24912515	24897100	165
ENSACAG00000001394	0.0784767	0.697471	0.112516	5.8568e-24	0.438815	1.23628	0.354949	8.83009e-09	0.171122	0.696855	0.245563	5.68112e-13	1	204215008	204269792	204242400	645
ENSACAG00000001395	0.0322585	0.892975	0.0361247	4.84931e-54	0.0305889	0.784912	0.0389711	2.4673e-49	0.0305701	0.936376	0.0326473	1.16747e-56	4	53266646	53267498	53267072	825
ENSACAG00000001397	0.0598737	1.01982	0.0587099	6.08504e-21	0.0619946	NA	NA	2.61355e-35	0.0619528	NA	NA	1.08606e-37	Un0090	1339620	1348162	1343891	342
ENSACAG00000001399	0.0842061	0.416204	0.202319	7.47397e-08	0.0727361	0.587168	0.123876	7.47108e-13	0.0874936	0.417126	0.209753	1.49713e-07	Un0011	2408199	2432138	2420170	378
ENSACAG00000001400	0.0181789	0.688194	0.0264154	0.000107395	0.0182355	0.882605	0.020661	1.62581e-05	0.106554	0.757682	0.140632	0.00118642	Un0031	354519	393394	373956	69
ENSACAG00000001401	0.0270556	0.453856	0.0596128	1.57556e-14	0.935919	1.75858	0.532202	0.0162967	0.0288623	0.593723	0.0486124	5.98747e-19	1	237018175	237083896	237051000	363
ENSACAG00000001402	0.00869936	0.963193	0.00903179	1.80195e-74	0.0167455	1.08024	0.0155017	7.74626e-75	0.0145461	0.914198	0.0159113	1.27868e-67	Un0090	1294953	1309924	1302440	891
ENSACAG00000001403	0.246486	1.23204	0.200063	0.0310599	0.245136	1.29117	0.189856	0.0290431	0.930665	NA	NA	0.00432105	4	71138268	71169022	71153645	48
ENSACAG00000001404	0.00434295	2.69233	0.00161308	3.16002e-38	0.169647	NA	NA	3.77826e-25	0.00867697	2.51672	0.00344774	3.01802e-36	Un2093	4680	16523	10601.5	294
ENSACAG00000001406	NA	0.934326	0	NA	NA	1.4469	0	NA	0.0121948	0.773501	0.0157657	1.41629e-15	Un1913	2113	5154	3633.5	213
ENSACAG00000001408	0.0137991	0.636502	0.0216796	3.04027e-63	0.0119753	0.761965	0.0157164	1.74099e-73	0.0119778	0.705282	0.016983	3.06359e-69	3	30289790	30298714	30294252	1080
ENSACAG00000001410	0.0294714	0.916303	0.0321633	4.47536e-07	0.0294714	0.768671	0.0383407	2.74913e-06	0.0595376	1.19032	0.0500182	6.12968e-07	2	49911651	49971753	49941702	90
ENSACAG00000001411	0.106869	0.955227	0.111878	5.91982e-94	0.125334	0.997508	0.125647	1.61148e-87	0.121741	0.918053	0.132608	9.99885e-83	1	235240774	235262990	235251882	2304
ENSACAG00000001412	0.136498	0.838272	0.162833	2.67452e-28	0.156292	0.92852	0.168323	2.82136e-28	0.157035	1.15164	0.136358	8.1711e-36	Un0286	312880	330304	321592	852
ENSACAG00000001414	0.146836	0.586136	0.250515	2.80756e-09	0.176235	0.661022	0.266609	4.14606e-09	0.179589	0.714384	0.251391	4.28524e-10	Un0510	38137	41303	39720	489
ENSACAG00000001415	0.101446	1.17572	0.0862844	7.1931e-51	0.146778	1.33286	0.110123	1.78912e-45	0.141887	1.29364	0.109681	2.01083e-45	Un0016	626367	627465	626916	954
ENSACAG00000001416	0.0268971	0.553178	0.0486229	1.97996e-26	0.0317554	0.584654	0.0543148	1.58668e-26	0.0316646	0.627273	0.0504798	3.18771e-28	3	119510998	119534859	119523000	561
ENSACAG00000001418	0.195771	0.667388	0.293338	1.22981e-17	0.290609	0.882531	0.329291	8.37038e-17	0.232277	0.733195	0.316801	6.43397e-17	3	186850047	186903509	186876778	1176
ENSACAG00000001420	0.122938	0.459088	0.267788	0.00292349	0.116937	0.376434	0.310644	0.00502808	0.128769	0.429524	0.299795	0.0104946	2	31309073	31315144	31312100	132
ENSACAG00000001422	0.133983	0.740704	0.180887	3.48895e-20	0.160589	0.769387	0.208723	9.43553e-18	0.20765	0.806485	0.257476	1.05842e-14	3	85437016	85465024	85451020	735
ENSACAG00000001423	0.0469819	0.664305	0.0707234	1.47783e-15	0.0427474	0.860506	0.049677	5.77793e-20	0.0553518	0.824073	0.0671685	1.27337e-17	Un0016	642879	652683	647781	324
ENSACAG00000001424	0.0772847	0.703235	0.109899	2.38033e-11	0.0937454	0.665359	0.140895	1.16986e-09	0.110776	0.778089	0.142369	2.48247e-10	2	31299271	31306256	31302800	270
ENSACAG00000001427	0.0545811	0.910106	0.0599722	4.17642e-29	0.0467595	1.10888	0.0421683	1.6792e-34	0.0606904	1.30329	0.0465672	6.36712e-35	Un0031	332480	343554	338017	489
ENSACAG00000001428	0.0737745	0.947965	0.077824	5.35223e-39	0.101674	1.13409	0.0896524	1.08168e-38	0.0899399	1.66391	0.0540532	2.3318e-52	Un0159	42152	149482	95817	771
ENSACAG00000001430	0.162693	1.41254	0.115177	4.32972e-54	0.168327	1.46476	0.114918	2.86085e-54	0.174255	1.42476	0.122305	5.5896e-52	Un0542	66303	68801	67552	1155
ENSACAG00000001431	NA	0.315484	0	NA	0.00457392	0.471579	0.00969917	1.37579e-15	NA	0.497353	0	NA	5	51421478	51425555	51423500	285
ENSACAG00000001432	0.0316031	0.790599	0.0399736	6.03143e-10	0.031483	0.725539	0.0433925	2.9549e-09	0.0477474	0.647027	0.0737951	1.85228e-07	4	53420542	53452461	53436500	162
ENSACAG00000001433	0.0296665	0.3494	0.084907	2.48807e-16	0.0357216	0.445303	0.0802185	3.72752e-19	0.0357069	0.547447	0.0652244	5.35729e-25	Un0031	315808	316375	316092	564
ENSACAG00000001436	0.0152536	1.09839	0.0138872	1.10505e-84	0.0165825	1.30985	0.0126598	2.35962e-92	0.0179416	1.24894	0.0143654	3.76462e-89	1	227451601	227492087	227471844	981
ENSACAG00000001439	0.0902745	1.05526	0.0855468	4.39009e-47	0.137345	1.39273	0.0986158	3.14908e-46	0.0894301	1.34236	0.0666217	6.41531e-57	Un0308	381701	395341	388521	909
ENSACAG00000001440	0.00697868	0.398677	0.0175046	9.09035e-09	0.0140907	0.473488	0.0297594	2.78813e-09	0.00701421	0.566321	0.0123856	1.13595e-11	Un0326	347737	387476	367606	186
ENSACAG00000001441	0.0981915	0.55096	0.178219	9.41533e-19	0.109236	0.633116	0.172537	5.62453e-21	0.107517	0.645506	0.166563	9.104e-22	1	237159674	237166244	237162959	825
ENSACAG00000001442	0.0411293	0.351735	0.116933	3.57263e-07	0.0412386	0.25565	0.161309	5.08001e-05	0.0362651	0.41043	0.0883587	8.39515e-09	4	83659319	83659949	83659634	264
ENSACAG00000001446	0.108934	0.713571	0.152661	1.07478e-19	0.126707	0.852957	0.148551	2.90049e-21	0.140887	0.779608	0.180715	2.0323e-18	1	237261310	237317591	237289000	636
ENSACAG00000001448	NA	1.82833	0	NA	0.976105	2.36681	0.412414	0.146052	0.0203117	NA	NA	9.22929e-15	Un0367	367875	394302	381088	99
ENSACAG00000001451	0.0500716	0.718537	0.0696855	5.79662e-41	0.0607337	0.733553	0.0827938	3.4763e-39	0.0590801	0.671771	0.0879468	2.60056e-36	5	52079449	52129314	52104400	864
ENSACAG00000001452	0.0819385	0.86013	0.0952629	1.69739e-45	0.084196	0.889851	0.0946181	7.3415e-46	0.0932498	0.904362	0.103111	2.77031e-44	Un0011	2434528	2499533	2467030	1002
ENSACAG00000001453	0.0159889	0.975405	0.0163921	2.34752e-30	0.0232236	0.810202	0.028664	4.74358e-25	0.0269113	1.00271	0.0268386	2.47387e-28	3	15489019	15492744	15490900	366
ENSACAG00000001454	0.0559612	0.664444	0.0842225	1.59429e-59	0.0699528	0.806605	0.0867249	3.14204e-65	0.0664233	0.810337	0.08197	1.86072e-67	2	30769734	30869036	30819385	1500
ENSACAG00000001457	0.0390165	1.1966	0.0326061	1.58997e-52	0.0457954	1.80153	0.0254203	2.76907e-62	0.0629732	1.59863	0.0393919	1.37125e-53	Un0542	98456	105640	102048	648
ENSACAG00000001459	0.0258008	0.577507	0.0446761	2.38237e-25	0.0482033	0.696153	0.0692423	1.12627e-24	0.0482604	0.612936	0.0787366	7.3127e-22	1	243261134	243271725	243266000	495
ENSACAG00000001460	0.072799	0.643454	0.113138	2.75192e-10	0.0782467	0.682498	0.114647	1.5702e-10	0.0800452	0.629775	0.127101	6.56118e-10	5	37913427	37959353	37936390	264
ENSACAG00000001462	0.241174	0.875944	0.27533	1.54014e-11	0.257892	0.965664	0.267062	1.89188e-12	0.268462	1.02767	0.261235	8.21102e-13	3	51307257	51314822	51311000	567
ENSACAG00000001468	0.0695271	0.69031	0.100719	2.96841e-32	0.071498	0.743984	0.0961016	1.88396e-33	0.0823318	0.945995	0.0870319	9.03894e-40	4	85539621	85554936	85547300	840
ENSACAG00000001470	0.0184867	0.446649	0.0413897	4.36633e-23	0.0159818	0.608664	0.0262571	2.56177e-31	0.0172215	0.600446	0.0286811	1.01813e-29	3	51292515	51296439	51294477	537
ENSACAG00000001471	0.044489	0.65982	0.067426	1.9854e-62	0.0461285	0.736746	0.0626111	5.97286e-68	0.0462043	0.808442	0.0571523	3.98794e-74	Un0016	659282	677898	668590	1377
ENSACAG00000001472	0.0776994	1.06129	0.0732121	9.59195e-43	0.0857642	1.23914	0.0692126	3.21609e-46	0.0837656	1.10899	0.0755333	5.95048e-43	Un0046	930506	933658	932082	753
ENSACAG00000001473	0.0943746	0.694097	0.135968	1.34679e-11	0.11282	0.978005	0.115357	1.13739e-14	0.109782	0.996271	0.110192	1.71021e-15	Un0138	730005	733620	731812	324
ENSACAG00000001476	0.0943729	1.15702	0.0815657	7.10769e-37	0.130339	1.65889	0.0785702	6.17268e-40	0.117275	2.08543	0.0562355	1.248e-46	Un0687	638	8330	4484	657
ENSACAG00000001481	0.0368024	1.08087	0.0340489	7.90317e-49	0.0345558	0.796358	0.0433922	1.81301e-39	0.0345101	0.749351	0.0460532	1.86178e-37	1	24821680	24822340	24822010	621
ENSACAG00000001482	0.0304834	0.604935	0.0503912	5.82983e-29	0.0433604	0.675266	0.0642123	4.75583e-28	0.038623	0.776895	0.0497146	5.14697e-33	Un0138	737788	751306	744547	588
ENSACAG00000001483	0.00813516	0.668958	0.0121609	1.30674e-11	0.00813516	0.607982	0.0133806	7.98878e-11	0.00813516	0.80816	0.0100663	3.07878e-13	2	30815428	30815788	30815608	162
ENSACAG00000001484	0.104115	0.601218	0.173174	4.22909e-13	0.111465	0.547799	0.203479	1.97007e-11	0.112621	0.740641	0.152058	7.53109e-16	2	30742189	30749650	30745900	510
ENSACAG00000001486	0.0422037	0.954057	0.044236	2.74319e-09	0.0604136	0.831586	0.0726486	6.69586e-07	0.0117703	0.708007	0.0166245	1.28958e-08	1	88815164	88830823	88823000	114
ENSACAG00000001488	0.0417148	0.83104	0.0501958	1.04388e-57	0.0565777	0.847871	0.0667292	4.43392e-53	0.0505213	0.815427	0.0619569	1.13894e-52	3	15400898	15426897	15413900	1044
ENSACAG00000001491	0.0465449	0.56228	0.082779	1.20972e-13	1.06947	2.70932	0.394737	0.0118695	0.0557072	0.453566	0.12282	2.55609e-10	2	30600348	30738905	30669600	345
ENSACAG00000001492	0.163272	0.762221	0.214205	1.27965e-13	0.215158	0.848512	0.253571	1.26722e-11	0.279585	0.894699	0.312491	3.67056e-09	5	112194335	112228370	112211000	570
ENSACAG00000001493	0.147611	0.980259	0.150583	7.7962e-24	0.166462	1.07556	0.154769	1.40094e-23	0.152386	0.974894	0.15631	7.4557e-24	Un2360	703	4366	2534.5	648
ENSACAG00000001494	0.126905	0.643217	0.197297	6.85593e-40	0.149984	0.609609	0.246033	4.37456e-31	0.136894	0.598566	0.228703	7.6661e-33	5	65063482	65071582	65067532	1734
ENSACAG00000001496	0.119053	0.661523	0.179968	5.91213e-10	0.0999091	1.03491	0.0965387	1.33028e-16	0.118015	0.99493	0.118617	5.77203e-15	3	138500581	138514812	138508000	351
ENSACAG00000001499	0.0527513	0.747656	0.0705556	2.9482e-13	0.0551384	0.888213	0.0620779	1.12484e-15	0.0527422	0.850221	0.0620335	8.71852e-15	1	182271189	182277366	182274000	273
ENSACAG00000001502	0.0297569	0.982168	0.0302971	9.67071e-18	0.0421168	0.965689	0.0436132	3.46801e-16	0.0546401	0.655318	0.0833794	8.80462e-11	Un0758	24481	45944	35212.5	228
ENSACAG00000001503	0.14469	0.621775	0.232705	2.9795e-22	0.143651	0.710366	0.202221	4.08957e-27	0.159767	0.69224	0.230797	6.18478e-24	4	94515056	94533957	94524500	1119
ENSACAG00000001505	0.111722	1.55456	0.0718673	2.41472e-12	0.140261	1.53558	0.0913405	5.21747e-11	0.131461	0.870239	0.151063	2.13826e-07	Un1441	1286	4552	2919	171
ENSACAG00000001506	NA	0.53372	0	NA	NA	0.53372	0	NA	0.0312125	0.556433	0.0560939	9.18275e-11	1	245648894	245722330	245685612	222
ENSACAG00000001507	0.242647	0.950286	0.255341	5.32632e-07	0.279994	0.781831	0.358126	0.000174667	0.268836	1.13261	0.23736	6.20651e-08	Un0046	843485	846613	845049	297
ENSACAG00000001510	0.107517	0.65219	0.164855	5.27921e-13	0.117112	0.782829	0.149601	7.75235e-15	0.113207	0.638416	0.177325	6.17019e-12	4	79856017	79873957	79864987	432
ENSACAG00000001515	0.0954976	0.656288	0.145512	2.82718e-76	0.115681	0.663572	0.17433	1.7382e-66	0.112326	0.632468	0.177599	5.99722e-64	3	119953040	119960179	119957000	2610
ENSACAG00000001520	0.0334131	0.689673	0.0484477	6.09267e-12	0.0475229	0.580119	0.0819192	3.00677e-09	0.0403363	0.637791	0.0632438	1.34868e-10	Un0103	667694	669360	668527	204
ENSACAG00000001523	NA	0.543564	0	NA	0.0411062	0.571605	0.0719136	0.0624825	0.779274	NA	NA	0.0470812	1	222652441	222680929	222666685	30
ENSACAG00000001525	0.0303433	0.4872	0.062281	1.15801e-09	0.0303433	0.4872	0.062281	1.15801e-09	0.0334463	0.464672	0.0719782	2.29754e-08	Un0103	612256	619985	616120	210
ENSACAG00000001526	0.135264	0.918848	0.14721	9.45474e-07	0.15626	0.776498	0.201236	4.95532e-05	0.15232	0.699169	0.217858	0.000196665	Un1431	17865	21413	19639	144
ENSACAG00000001528	0.149472	0.726683	0.205691	1.26666e-07	0.149437	0.68362	0.218597	3.53842e-07	0.155866	0.727531	0.214239	1.84667e-07	1	24643977	24650302	24647100	249
ENSACAG00000001529	0.0726838	0.652088	0.111463	2.00286e-08	0.0589539	0.55823	0.105609	5.90148e-08	0.0729584	0.549496	0.132773	4.15332e-07	Un0371	7321	13329	10325	207
ENSACAG00000001530	0.182321	1.2769	0.142784	1.05266e-06	0.19176	0.663164	0.28916	0.00320125	0.170447	1.56931	0.108613	6.62382e-08	3	15191769	15221921	15206845	150
ENSACAG00000001533	0.0553392	0.30215	0.183151	0.000120179	0.0551501	0.333354	0.16544	3.43487e-05	0.0488309	0.279119	0.174946	0.000158303	4	79727095	79779002	79753000	225
ENSACAG00000001535	0.0704961	1.21282	0.0581256	1.31564e-14	0.0779996	1.3784	0.0565869	2.29111e-15	0.249969	NA	NA	0	Un3307	3848	9082	6465	204
ENSACAG00000001538	0.00928509	0.842801	0.0110169	2.2281e-21	0.00461723	0.628373	0.00734791	2.69323e-18	0.00937172	0.870267	0.0107688	1.55514e-21	1	261620735	261624061	261622398	276
ENSACAG00000001540	0.200817	0.45698	0.439444	6.11299e-06	0.0543003	0.419322	0.129496	9.01624e-19	0.0542872	0.498087	0.108991	4.26491e-23	3	106782603	106799339	106790971	795
ENSACAG00000001541	0.0437225	0.610473	0.0716206	1.09971e-22	0.051437	0.789628	0.0651408	7.5584e-27	0.0615794	0.751814	0.0819077	1.78393e-23	Un0096	709	46765	23737	507
ENSACAG00000001544	0.0630455	2.51715	0.0250464	2.01306e-107	0.0752048	NA	NA	1.92263e-109	0.0725879	NA	NA	4.07652e-118	Un0886	8148	22569	15358.5	1170
ENSACAG00000001545	0.0556149	0.486329	0.114357	2.49659e-19	0.220432	0.925171	0.238261	1.69439e-14	0.138158	0.710869	0.19435	2.94311e-16	Un0231	192247	208591	200419	654
ENSACAG00000001547	0.00782332	0.468836	0.0166867	5.36395e-33	0.0177473	0.528787	0.0335624	3.83416e-32	0.01772	0.456484	0.0388185	6.05492e-28	3	15023162	15038123	15030600	666
ENSACAG00000001552	0.156859	1.32538	0.118351	2.87092e-70	0.161022	1.34306	0.119892	9.50313e-71	0.170105	1.21016	0.140564	4.73609e-62	Un0326	422415	468516	445466	1593
ENSACAG00000001554	0.0241209	0.669638	0.0360208	1.34427e-108	0.0303144	0.810499	0.0374022	1.56562e-119	0.0260754	0.727687	0.0358333	1.97394e-114	Un0033	2242484	2290863	2266670	2028
ENSACAG00000001556	0.0107488	0.478237	0.0224759	7.90136e-89	0.0224921	0.583294	0.0385604	3.94061e-91	0.0114438	0.589163	0.0194238	1.11636e-105	3	30209682	30237770	30223726	1878
ENSACAG00000001558	0.128838	0.473594	0.272043	7.89403e-06	0.134819	0.308484	0.437037	0.0065861	0.139117	0.478044	0.291012	6.14284e-06	1	24464892	24476131	24470500	381
ENSACAG00000001560	0.114085	0.714011	0.159781	3.80317e-25	0.123902	0.82891	0.149476	6.34521e-28	0.12462	0.860766	0.144778	1.85318e-28	3	146603333	146609278	146606000	870
ENSACAG00000001562	0.103536	0.720438	0.143713	2.2844e-31	0.182508	0.908673	0.200852	4.17946e-26	0.115599	0.936742	0.123406	1.62188e-39	2	117329993	117343326	117337000	963
ENSACAG00000001564	0.0681229	0.75043	0.0907785	3.55477e-26	0.0942681	0.831412	0.113383	1.75866e-24	0.0993011	0.831342	0.119447	5.27639e-24	1	133496867	133499138	133498000	642
ENSACAG00000001566	0.0775813	0.631437	0.122865	6.86311e-44	0.0806031	0.612639	0.131567	2.89045e-41	0.0838685	0.59796	0.140258	3.60338e-39	1	243279116	243316004	243297560	1368
ENSACAG00000001570	0.0426459	1.03176	0.041333	4.38928e-111	0.0500464	1.17773	0.0424938	1.39859e-115	0.0527297	1.19364	0.0441757	2.71824e-115	Un0706	86622	104850	95736	1647
ENSACAG00000001571	0.103929	2.53938	0.0409269	4.91958e-37	0.126797	NA	NA	1.41398e-39	0.137972	NA	NA	1.60522e-41	Un0542	109067	116681	112874	489
ENSACAG00000001572	0.117944	0.674245	0.174927	1.53233e-33	0.118579	0.778435	0.15233	2.00046e-40	1.05531	2.26719	0.465469	4.98456e-06	5	64422902	64548356	64485629	1329
ENSACAG00000001573	0.0284197	0.757742	0.0375058	8.7119e-25	0.0427992	1.12546	0.0380281	4.4716e-30	0.0267805	1.00989	0.0265182	2.69205e-30	4	121060801	121063114	121062000	396
ENSACAG00000001575	0.0750489	0.572094	0.131183	3.19274e-19	0.0563934	0.618788	0.0911352	3.95885e-24	0.192886	0.657683	0.293281	1.8085e-10	1	96693703	96714250	96704000	621
ENSACAG00000001576	0.0261868	1.3074	0.0200297	1.10801e-82	0.031977	1.3323	0.0240015	3.11861e-80	0.0305214	1.16206	0.0262649	9.30129e-75	Un0429	132335	144509	138422	933
ENSACAG00000001578	0.091135	0.488399	0.1866	4.29511e-17	0.092946	0.534523	0.173886	5.63794e-19	0.13009	0.48362	0.268993	1.7229e-12	2	30450646	30463770	30457208	768
ENSACAG00000001579	0.160474	0.492215	0.326023	0.0217499	0.178075	0.559569	0.318236	0.0221899	0.178075	0.559569	0.318236	0.0221899	Un4960	706	4081	2393.5	108
ENSACAG00000001580	0.250238	0.519431	0.481755	0.00105818	0.257543	0.526224	0.489417	0.00114464	0.224076	0.720993	0.310788	5.96756e-08	Un1573	648	24165	12406.5	435
ENSACAG00000001581	0.156299	0.771565	0.202574	7.82551e-30	0.185595	0.857822	0.216356	5.4548e-29	0.348845	0.967673	0.360499	1.01599e-15	3	146579478	146596315	146588000	1290
ENSACAG00000001582	0.0167053	0.694276	0.0240615	3.79541e-20	0.0164513	1.1437	0.0143843	3.62651e-26	0.0146265	0.858091	0.0170454	4.79007e-25	Un0516	203781	205403	204592	315
ENSACAG00000001583	0.00568352	0.145434	0.0390798	0.000320607	0.011383	0.365223	0.0311672	1.55904e-08	0.00568921	0.229265	0.0248149	2.73077e-06	1	24178976	24205898	24192437	222
ENSACAG00000001584	0.0122586	0.482603	0.0254011	1.91952e-31	0.0375167	NA	NA	7.78245e-75	0.0153495	0.720919	0.0212915	1.80546e-43	3	120001225	120025345	120013285	648
ENSACAG00000001586	0.00585369	0.659669	0.00887367	8.88332e-30	0.00585369	0.589305	0.00993321	2.63339e-27	0.0119786	0.524615	0.0228331	2.58999e-22	2	117345869	117364741	117355305	441
ENSACAG00000001587	0.107705	0.789415	0.136437	9.40592e-18	0.142875	0.872306	0.16379	1.27295e-16	0.125545	0.925031	0.13572	8.47048e-19	4	68057774	68086526	68072150	492
ENSACAG00000001588	0.0111598	0.72002	0.0154993	1.11012e-64	0.0124803	0.733761	0.0170086	1.42522e-64	0.0111562	0.828178	0.0134707	1.0608e-71	1	245835034	245836015	245836000	978
ENSACAG00000001589	0.0179434	0.667911	0.026865	6.77162e-15	0.0119145	0.75573	0.0157655	2.50378e-17	0.0179482	0.452718	0.0396454	1.02468e-10	Un0059	314028	335275	324652	228
ENSACAG00000001590	0.0939006	1.21501	0.0772838	5.19806e-13	0.114917	1.64775	0.0697414	3.25451e-14	0.147997	1.23801	0.119545	5.34922e-10	Un0936	6652	19275	12963.5	210
ENSACAG00000001591	0.0676184	0.689194	0.0981123	3.80569e-31	0.0639025	0.69197	0.0923486	4.12882e-32	0.0737751	0.838527	0.0879818	1.19825e-36	Un0031	230936	236701	233818	774
ENSACAG00000001593	0.0630433	0.786195	0.0801879	4.0148e-26	0.0774432	0.679298	0.114005	3.94699e-20	0.075971	0.720607	0.105426	4.57212e-22	5	112253071	112269892	112261000	558
ENSACAG00000001594	0.0295119	0.644306	0.0458042	1.58505e-58	0.0286805	0.670182	0.0427951	6.85954e-60	0.0227626	0.702731	0.0323916	1.4978e-67	1	246195844	246248522	246222183	1179
ENSACAG00000001595	0.0667182	0.992955	0.0671916	1.23511e-13	0.0588636	1.26448	0.0465515	6.77068e-18	0.0587547	2.68072	0.0219175	1.27069e-23	Un0142	859871	886361	873116	225
ENSACAG00000001596	0.0777711	0.712292	0.109184	2.74997e-08	0.0778815	0.498268	0.156304	7.1077e-06	0.0692921	0.595601	0.11634	2.03188e-07	6	37468211	37500802	37484500	171
ENSACAG00000001597	0.0906116	1.12488	0.0805525	3.75976e-38	0.100231	0.975912	0.102705	5.47867e-33	0.117099	1.22884	0.0952926	5.17128e-36	Un0966	28351	37648	32999.5	732
ENSACAG00000001599	0.250563	1.18379	0.211661	4.13144e-14	0.274079	1.85819	0.147498	6.47941e-19	0.26503	2.54801	0.104014	7.76103e-23	Un0886	23743	30784	27263.5	522
ENSACAG00000001600	0.0447556	0.716394	0.0624734	1.96213e-69	0.053945	0.931381	0.0579194	7.94057e-82	0.060688	0.821068	0.0739135	3.48513e-70	1	142932830	142934315	142934000	1482
ENSACAG00000001601	0.042335	0.79211	0.0534459	7.17193e-20	0.0537835	0.831668	0.0646695	4.7404e-19	0.036662	1.16087	0.0315814	1.91992e-26	Un1595	9937	21822	15879.5	354
ENSACAG00000001604	0.0337032	0.959988	0.0351079	1.95957e-12	0.0555637	0.916985	0.0605938	3.72793e-11	0.0512922	1.13873	0.0450434	1.42955e-12	1	142994190	142994445	142994000	162
ENSACAG00000001605	0.0348032	1.23204	0.0282483	3.84924e-22	0.0476161	1.04883	0.0453991	4.04004e-19	0.0450332	1.32638	0.0339519	1.11204e-21	1	123978546	123990186	123984366	267
ENSACAG00000001606	0.00207905	0.757224	0.00274562	3.90127e-48	0.00744641	0.816833	0.0091162	2.61756e-47	0.00729613	0.858313	0.00850055	6.88922e-50	Un0326	481666	503259	492462	618
ENSACAG00000001608	0.0641139	0.270186	0.237296	7.78851e-36	0.0843986	0.357586	0.236023	2.93393e-44	0.0882125	0.332109	0.265613	7.51037e-37	4	94747356	94771402	94759379	3498
ENSACAG00000001610	0.0863668	1.06078	0.0814185	6.69422e-21	0.111695	1.22312	0.0913201	1.06019e-20	0.101637	1.2793	0.0794475	6.27064e-22	1	227360160	227368902	227364531	363
ENSACAG00000001612	0.0815184	0.414482	0.196675	7.00948e-10	0.0986599	0.409908	0.240688	2.47169e-08	0.0799196	0.428962	0.186309	4.91482e-10	1	226686336	226703857	226695000	513
ENSACAG00000001613	0.22768	0.658738	0.34563	2.17056e-12	0.235739	0.818568	0.287989	8.04314e-17	0.231565	0.89627	0.258365	5.52605e-20	1	143056021	143117244	143087000	1026
ENSACAG00000001615	0.112136	0.977096	0.114764	1.91703e-07	0.10798	1.09171	0.0989097	6.3536e-09	0.0975611	1.00498	0.0970779	9.49996e-09	1	148447975	148453490	148451000	150
ENSACAG00000001617	0.0824882	0.749337	0.110082	2.00109e-36	0.130905	1.18315	0.110641	2.66465e-43	0.121973	1.0409	0.11718	4.17771e-40	1	88742447	88758278	88750400	915
ENSACAG00000001619	0.104813	1.61701	0.0648192	5.54522e-64	0.129687	1.52095	0.0852671	7.97342e-56	0.131914	2.17543	0.0606384	1.81343e-65	1	182203072	182204176	182203624	1089
ENSACAG00000001620	0.0896249	1.77034	0.0506259	5.0473e-13	0.136825	1.22875	0.111353	2.29754e-08	0.12071	1.31572	0.0917443	6.87371e-10	Un0193	832171	834473	833322	150
ENSACAG00000001622	0.0882852	1.13259	0.0779501	5.20212e-33	0.138787	1.43009	0.0970478	2.23737e-30	0.0803915	1.62963	0.049331	2.85295e-43	Un0936	37056	70845	53950.5	564
ENSACAG00000001625	0.0709363	1.42255	0.0498656	1.13786e-48	0.0992708	2.19775	0.0451693	1.54486e-51	0.100426	1.66765	0.0602201	2.26764e-46	Un0059	408721	426149	417435	657
ENSACAG00000001626	0.0524168	0.646375	0.0810935	1.28842e-25	0.0644808	0.671526	0.0960214	8.71544e-25	0.0619146	0.639034	0.0968877	7.73286e-24	Un0068	1272127	1346087	1309107	630
ENSACAG00000001627	NA	0.614822	0	NA	0.135687	NA	NA	5.37432e-34	0.0086136	0.937824	0.00918467	9.85991e-28	3	201622237	201715376	201669000	312
ENSACAG00000001628	0.007423	0.751826	0.0098733	2.06937e-20	0.0174393	0.907016	0.0192271	6.77428e-21	0.00992406	0.770839	0.0128744	3.11838e-19	Un0142	1172420	1428148	1300284	261
ENSACAG00000001629	0.0156574	0.314509	0.0497836	2.94487e-08	0.0209141	0.343464	0.0608916	2.42934e-08	0.020894	0.242682	0.0860959	6.89531e-06	5	120738573	120751089	120744831	252
ENSACAG00000001631	0.14392	0.562244	0.255973	0.000788825	0.155817	0.930347	0.167482	1.01037e-05	0.200336	0.793728	0.252398	0.000439602	Un0416	423755	430974	427364	144
ENSACAG00000001633	0.0277817	0.535611	0.0518692	5.399e-28	0.0353635	0.573242	0.0616902	1.02148e-28	0.0704303	0.522563	0.134779	1.03369e-18	1	219440192	219464454	219452323	657
ENSACAG00000001634	NA	0.249066	0	NA	NA	0.349324	0	NA	NA	0.380654	0	NA	4	96985124	96992827	96989000	459
ENSACAG00000001637	0.0113969	1.11848	0.0101896	1.66625e-20	0.0172644	0.84798	0.0203594	1.62036e-16	0.0171842	0.944235	0.0181991	1.2254e-17	Un0542	117976	131209	124592	225
ENSACAG00000001642	0.0506053	0.492521	0.102747	7.61832e-41	0.0545991	0.564424	0.0967342	6.45619e-46	0.0516675	0.564327	0.091556	2.67507e-47	Un0945	4100	24070	14085	1347
ENSACAG00000001644	0.210022	1.05891	0.198338	5.97923e-41	0.24065	1.47119	0.163575	2.13959e-50	0.259289	1.92222	0.134891	8.38888e-57	Un0966	43103	60723	51913	1479
ENSACAG00000001646	0.103062	0.990174	0.104085	1.2258e-16	0.102796	0.813499	0.126363	2.01918e-13	0.107786	0.795267	0.135534	2.58448e-13	4	79632681	79711450	79672100	369
ENSACAG00000001647	0.21122	1.67222	0.126311	1.61265e-13	0.209317	1.30368	0.160558	4.37451e-11	0.224684	2.82272	0.0795984	3.33995e-16	Un1899	567	9275	4921	285
ENSACAG00000001649	0.0891128	0.796168	0.111927	2.79459e-35	0.111205	0.917134	0.121253	1.91479e-36	0.120015	0.880225	0.136346	1.99644e-32	1	124035901	124037463	124036682	837
ENSACAG00000001652	0.0125977	1.00214	0.0125708	2.67021e-85	0.0235471	1.37754	0.0170937	4.71436e-95	0.0254438	1.64679	0.0154505	1.16444e-100	Un0231	212123	221267	216695	1032
ENSACAG00000001654	0.237221	0.481087	0.493094	3.84134e-08	0.24924	0.54653	0.456041	5.83338e-10	0.251141	0.547846	0.458416	4.08717e-10	1	124065249	124090540	124078000	1485
ENSACAG00000001655	0.203089	0.907185	0.223867	7.69645e-61	0.210794	0.972209	0.21682	5.1043e-64	0.216724	0.983175	0.220433	3.02322e-63	3	120034943	120038102	120037000	2730
ENSACAG00000001656	0.11102	1.00455	0.110517	3.9442e-07	0.11511	2.41353	0.0476938	1.51276e-11	0.100491	2.01722	0.0498164	6.024e-11	Un0286	340166	364387	352276	147
ENSACAG00000001658	0.0676247	0.682207	0.0991264	1.32702e-11	0.067524	0.575848	0.11726	9.45043e-10	0.0625986	0.681515	0.0918522	5.246e-12	2	50000958	50023007	50012000	279
ENSACAG00000001659	0.0305549	0.404202	0.0755931	6.15667e-05	0.072858	0.416118	0.17509	0.00136366	1.68146	NA	NA	0.0012313	3	120373953	120417184	120396000	129
ENSACAG00000001663	0.0938194	0.517113	0.181429	1.80193e-16	0.100204	0.643099	0.155815	6.33294e-21	0.105277	0.605461	0.173879	2.42532e-18	4	37739719	37760551	37750135	729
ENSACAG00000001666	NA	0.798625	0	NA	0.00719159	0.692828	0.01038	3.39681e-15	0.0071742	0.798625	0.00898318	9.14922e-17	Un0429	323131	337296	330214	195
ENSACAG00000001669	0.0329592	0.701833	0.0469616	1.41783e-29	0.0289333	0.582122	0.0497032	2.77732e-25	0.0343317	0.651646	0.0526846	1.0224e-26	Un0193	837191	842904	840048	516
ENSACAG00000001671	0.00207928	0.303005	0.00686222	3.97353e-23	0.00416401	0.409136	0.0101776	1.10073e-28	0.00207928	0.408982	0.00508405	9.52727e-33	4	97210021	97226459	97218240	618
ENSACAG00000001672	0.0628578	0.690759	0.0909981	2.26883e-09	0.0520701	0.826858	0.0629735	2.08445e-12	0.0555421	0.806677	0.068853	3.0495e-11	1	181799206	181799404	181799305	198
ENSACAG00000001675	0.162749	0.588046	0.276762	0.00184086	0.195281	0.653721	0.298723	0.00172598	0.216993	1.24314	0.174552	3.63248e-06	Un0059	458899	459535	459217	153
ENSACAG00000001676	0.0243464	0.326951	0.0744649	7.47627e-30	0.0267245	0.387715	0.0689283	5.11977e-35	0.0291039	0.380763	0.0764356	2.00032e-34	1	96629160	96686918	96658039	1137
ENSACAG00000001677	0.0600416	0.955224	0.0628561	4.77261e-13	1.23329	NA	NA	0.0335345	0.0536071	0.940741	0.0569839	1.8318e-13	Un0059	626724	674487	650606	210
ENSACAG00000001679	0.028095	0.937025	0.0299832	4.34231e-91	0.0399836	1.0346	0.0386465	3.65928e-89	0.0400335	1.08014	0.0370632	3.86669e-92	2	117410001	117416186	117413000	1347
ENSACAG00000001683	0.271814	0.713185	0.381127	4.0217e-14	0.302124	0.821411	0.36781	1.52278e-15	0.302355	0.932132	0.324369	1.25831e-19	3	186906007	186918835	186912421	1335
ENSACAG00000001684	0.303931	0.866344	0.35082	7.02175e-08	0.324534	0.690421	0.470052	9.11863e-05	0.299386	0.672985	0.444862	4.21584e-05	Un0752	56581	60682	58631.5	486
ENSACAG00000001685	0.0389177	1.90416	0.0204382	3.63499e-26	0.0562624	2.83473	0.0198475	3.50421e-27	0.051289	1.99264	0.0257392	1.0151e-25	Un0090	1175857	1180757	1178307	273
ENSACAG00000001686	0.00644284	0.439329	0.0146652	1.42534e-10	0.0129018	0.568985	0.0226751	5.58172e-12	0.0129415	0.517972	0.024985	3.89437e-11	1	181095278	181096670	181095974	204
ENSACAG00000001687	0.0179035	1.05975	0.0168941	1.42426e-70	0.0322301	1.14715	0.0280957	2.47504e-66	0.0538928	1.10372	0.0488283	3.02372e-56	Un1201	599	41126	20862.5	843
ENSACAG00000001691	0.0546682	0.480505	0.113772	3.68254e-10	0.10733	0.637679	0.168314	6.47558e-10	0.0853041	0.56416	0.151205	6.87008e-10	6	37289085	37316358	37302700	336
ENSACAG00000001693	0.14182	0.768564	0.184526	6.32965e-09	0.165833	0.801126	0.207	8.01092e-09	0.182241	1.00713	0.180951	2.40242e-10	1	88695890	88704236	88700063	294
ENSACAG00000001696	0.0173073	0.968238	0.0178751	4.05262e-18	0.0320023	0.650215	0.0492181	1.50045e-12	0.0379874	0.698186	0.0544087	1.11196e-12	1	219407077	219415333	219411205	225
ENSACAG00000001698	0.0179244	0.246725	0.0726494	3.63922e-20	0.0232951	0.339966	0.0685218	1.01623e-26	0.020507	0.378115	0.0542348	3.12865e-31	2	117453807	117454806	117454000	957
ENSACAG00000001702	0.0527854	0.799546	0.0660192	1.18237e-23	0.0636286	0.99626	0.0638674	1.14729e-25	0.100863	1.01833	0.0990474	1.0769e-21	1	180754864	180776200	180765532	444
ENSACAG00000001704	0.0426663	0.547043	0.0779944	3.46599e-06	0.0428688	0.411424	0.104196	7.06257e-05	0.0618871	0.444296	0.139292	0.000471065	5	120682568	120709094	120695831	114
ENSACAG00000001707	0.125508	2.2922	0.0547544	3.70638e-36	0.143082	1.84065	0.0777346	6.00248e-31	0.133758	NA	NA	6.78695e-39	Un0090	1146799	1154293	1150546	519
ENSACAG00000001708	0.0285929	1.12539	0.0254071	8.11288e-21	0.0519344	1.46178	0.0355283	7.37098e-21	0.0521252	2.90756	0.0179275	5.348e-26	Un0429	345617	353534	349576	240
ENSACAG00000001709	0.0156171	0.437777	0.0356737	6.56215e-18	0.0285119	0.484224	0.0588816	9.25394e-17	0.0251842	0.533045	0.0472458	2.88998e-19	4	97400580	97428463	97414500	420
ENSACAG00000001712	0.0128934	0.474654	0.0271639	9.11206e-28	0.0281348	0.606649	0.0463775	5.87853e-29	0.0172567	0.530807	0.0325102	4.48385e-29	3	120462775	120463381	120463078	603
ENSACAG00000001714	0.0379732	0.264827	0.143389	6.10898e-17	0.0408623	0.297067	0.137552	7.6391e-19	0.0419554	0.273117	0.153617	2.13384e-16	1	124150446	124151406	124150926	954
ENSACAG00000001717	0.0621766	0.54797	0.113467	7.90751e-25	0.0611601	0.543014	0.112631	2.84799e-24	0.0581411	0.585633	0.0992792	1.29275e-27	1	124379707	124418441	124399074	726
ENSACAG00000001719	0.00661576	0.895262	0.00738974	5.22545e-16	0.0132004	0.857162	0.0154001	2.07047e-14	0.0132004	1.03736	0.012725	2.98701e-16	3	120465834	120470539	120468000	192
ENSACAG00000001722	0.132138	1.35197	0.0977369	1.1365e-24	0.145438	1.48166	0.0981585	5.85207e-25	0.122772	1.14205	0.107501	1.20349e-22	Un0231	229691	306151	267921	480
ENSACAG00000001723	0.0699894	1.18422	0.0591016	2.62765e-49	0.0746796	1.3018	0.0573662	4.67538e-52	0.08362	1.16115	0.0720149	3.93265e-45	Un0435	176960	196654	186807	780
ENSACAG00000001725	0.17085	0.793793	0.215233	1.70438e-22	0.179235	0.982372	0.182452	4.172e-28	0.161004	1.00954	0.159482	1.17779e-31	3	186938917	186997559	186968238	969
ENSACAG00000001727	0.0213234	0.600849	0.0354888	5.61042e-08	0.821033	1.4874	0.551993	0.151005	0.0213336	0.743844	0.0286802	2.16437e-09	Un0053	301458	331934	316696	129
ENSACAG00000001729	0.013044	0.838298	0.0155601	4.39164e-67	0.0145047	0.932358	0.015557	3.10203e-71	0.0130544	1.09	0.0119765	5.22964e-80	Un0103	499112	511176	505144	906
ENSACAG00000001730	0.0384143	1.96944	0.0195052	2.60421e-68	0.0424712	2.60486	0.0163046	9.60087e-72	0.131113	2.52895	0.0518448	1.24841e-48	Un1946	3455	16533	9994	681
ENSACAG00000001732	0.148261	0.868145	0.170779	3.56213e-69	0.165586	0.942579	0.175673	3.98271e-69	0.1641	0.938172	0.174915	8.19383e-70	5	112306735	112316700	112312000	2406
ENSACAG00000001733	0.044156	0.656842	0.0672246	4.91627e-18	0.0459073	0.760443	0.0603692	5.73499e-21	0.0371912	0.744737	0.0499387	2.32945e-21	2	164211586	164221585	164217000	390
ENSACAG00000001736	0.0995239	0.955246	0.104187	2.16918e-66	0.125002	1.05786	0.118165	8.56125e-64	0.131609	1.1469	0.114752	4.1539e-66	5	53189606	53191163	53190400	1539
ENSACAG00000001739	0.0352662	0.560653	0.062902	8.68716e-86	0.0372452	0.629937	0.0591253	1.41935e-94	0.0753977	0.701929	0.107415	2.52197e-77	3	155007145	155152736	155080000	2067
ENSACAG00000001740	0.195612	2.10217	0.0930523	1.05517e-24	0.208282	2.17561	0.0957349	1.37972e-23	0.194884	1.5514	0.125618	7.9626e-21	1	222829188	222834987	222832000	468
ENSACAG00000001742	0.0783665	0.742252	0.105579	2.7534e-37	0.0885568	0.804666	0.110054	2.54978e-37	0.0911192	0.841732	0.108252	4.37502e-39	5	53315415	53332657	53324036	924
ENSACAG00000001743	NA	0.481939	0	NA	NA	0.74024	0	NA	0.00443007	0.516591	0.00857557	1.76833e-16	Un0090	1138837	1141850	1140340	288
ENSACAG00000001745	0.171037	0.542321	0.31538	2.68253e-13	0.193278	0.675583	0.286091	3.27405e-16	0.197321	0.668371	0.295227	1.01513e-15	3	120481123	120516762	120499000	1044
ENSACAG00000001747	0.204235	1.54805	0.131931	1.58502e-17	0.207009	1.55313	0.133285	1.25108e-16	0.228609	1.48803	0.153632	7.05924e-15	Un0286	395469	416751	406110	384
ENSACAG00000001752	0.102211	2.91348	0.035082	4.15736e-33	0.131628	NA	NA	3.17887e-31	0.130588	3.4427	0.0379319	3.61306e-30	Un0326	527651	543048	535350	417
ENSACAG00000001755	0.0284113	1.10005	0.0258272	8.43557e-05	0.0281645	NA	NA	9.72157e-07	0.707775	NA	NA	0.00480822	Un0119	780349	807902	794126	48
ENSACAG00000001757	0.212039	0.777452	0.272736	4.15494e-05	1.68798	1.26398	1.33545	0.484663	0.197238	0.909513	0.216861	4.80235e-06	Un0041	2208260	2331597	2269930	198
ENSACAG00000001758	0.0913385	2.04431	0.0446793	1.02525e-12	0.0868668	2.69411	0.0322432	2.95757e-13	0.0668145	0.892371	0.0748729	1.61255e-08	Un0326	546069	552315	549192	144
ENSACAG00000001764	0.0513329	0.64847	0.07916	2.37735e-25	0.0439657	0.703311	0.0625125	2.41874e-29	0.0471007	0.816485	0.0576872	1.44455e-31	3	88021847	88042132	88032000	537
ENSACAG00000001770	0.176963	1.14266	0.154869	1.35887e-11	0.191765	0.859727	0.223054	2.12455e-08	0.202149	1.05172	0.192208	1.24424e-09	Un1438	6784	26421	16602.5	291
ENSACAG00000001776	0.0978745	0.972604	0.100631	1.52948e-15	0.109935	1.37385	0.0800194	1.00224e-19	0.109951	1.67283	0.0657277	4.31838e-22	Un0326	591665	595843	593754	315
ENSACAG00000001777	0.156418	0.849396	0.184152	4.84265e-06	0.167755	1.21433	0.138146	6.4269e-07	0.173901	1.96085	0.0886868	1.31665e-09	Un0286	445741	449601	447671	153
ENSACAG00000001779	0.0725191	0.565109	0.128328	2.81532e-07	0.0726037	0.707342	0.102643	4.23967e-09	0.0793802	0.97358	0.0815343	1.61679e-11	Un0286	483458	506066	494762	207
ENSACAG00000001781	0.0912375	0.792742	0.115091	1.30391e-12	0.0976171	1.04257	0.0936316	6.13136e-16	0.109103	1.27429	0.0856187	2.63582e-16	Un0435	165334	170229	167782	303
ENSACAG00000001784	0.0348593	0.613478	0.0568225	1.28197e-63	0.0338459	0.726837	0.046566	3.53211e-75	0.0568202	0.644706	0.0881336	1.52325e-54	3	146563677	146577394	146571000	1368
ENSACAG00000001786	0.0459403	1.24796	0.0368124	2.33165e-54	0.0562607	1.26512	0.0444707	7.46119e-52	0.0655664	1.63892	0.0400058	1.89271e-57	Un0141	4114	22315	13214.5	708
ENSACAG00000001787	0.0576026	0.626435	0.0919531	3.33742e-18	0.0807096	0.809154	0.0997456	6.07026e-20	0.0882453	0.875446	0.1008	3.88036e-21	1	180738886	180752671	180746000	480
ENSACAG00000001790	0.125429	0.713142	0.175883	2.1844e-16	0.173926	0.850758	0.204437	3.45825e-15	0.169693	0.941423	0.180252	7.7233e-18	4	67814840	67830590	67822715	573
ENSACAG00000001791	0.0690205	0.781384	0.0883311	3.09604e-87	0.0801885	0.825487	0.0971409	3.05361e-85	0.0810961	0.745661	0.108757	1.87577e-76	5	112611438	112727414	112669426	2028
ENSACAG00000001796	0.0226583	0.460021	0.0492551	5.6506e-12	0.0225831	0.528867	0.0427008	1.50825e-13	0.0225122	0.570946	0.0394296	1.95818e-14	4	67789841	67812921	67801381	288
ENSACAG00000001799	0.0151601	0.623664	0.0243081	3.90894e-182	0.0172687	0.697027	0.0247748	4.81233e-194	0.0210723	0.695915	0.03028	2.00271e-185	4	37295919	37321932	37308900	3357
ENSACAG00000001802	0.0208683	0.551838	0.0378159	9.50599e-47	0.0249558	0.472306	0.0528382	2.83718e-38	0.0250608	0.489376	0.0512097	1.472e-39	1	243469730	243520087	243495000	972
ENSACAG00000001804	0.114444	1.02222	0.111956	8.75496e-19	0.217936	1.5958	0.136569	7.22549e-17	0.170392	0.990187	0.17208	6.38023e-14	Un0416	264380	279894	272137	399
ENSACAG00000001810	0.00871996	1.71257	0.00509173	5.86495e-51	0.0116578	NA	NA	3.17763e-58	0.0160586	NA	NA	2.0531e-58	Un0435	150039	162601	156320	447
ENSACAG00000001813	0.0261383	0.83842	0.0311756	4.67249e-54	0.0261926	0.844448	0.0310174	1.80151e-54	0.022637	0.760184	0.0297783	1.16687e-51	1	180536751	180558526	180548000	786
ENSACAG00000001816	0.0291704	0.981587	0.0297176	2.70657e-07	0.0144077	0.829728	0.0173643	2.97064e-07	0.0441924	0.981587	0.0450214	1.12697e-06	3	87380425	87457971	87419198	90
ENSACAG00000001817	0.00584832	1.33982	0.00436499	3.81311e-168	0.0586474	1.51224	0.0387817	6.9333e-125	0.00794734	1.33306	0.00596171	2.2476e-165	Un0347	81837	107999	94918	1578
ENSACAG00000001821	0.120412	1.62917	0.0739104	4.00123e-14	0.196521	1.55371	0.126485	2.58289e-10	0.179829	1.48385	0.121191	1.51421e-10	Un0319	99348	122858	111103	198
ENSACAG00000001823	0.129057	1.06884	0.120745	6.99586e-25	0.213517	1.09052	0.195794	7.07211e-17	0.147458	1.07347	0.137365	2.27727e-23	4	85616122	85633843	85625000	558
ENSACAG00000001824	0.113941	0.584648	0.194888	3.89303e-06	0.13484	0.955158	0.14117	3.24907e-09	0.117974	0.837528	0.14086	2.37835e-09	Un0011	2499730	2541851	2520790	222
ENSACAG00000001826	0.0199954	0.783653	0.0255156	1.1293e-50	0.0171483	1.01865	0.0168344	3.19401e-63	0.0202438	0.857671	0.0236033	2.65196e-54	Un0059	688753	719861	704307	783
ENSACAG00000001828	0.151544	1.45361	0.104254	9.01491e-20	0.151523	2.26179	0.0669924	1.45971e-24	0.148627	2.22811	0.0667052	7.5659e-24	Un1990	9855	12707	11281	381
ENSACAG00000001830	0.0566401	1.15762	0.048928	9.63935e-36	0.163594	NA	NA	5.30997e-39	0.156649	4.29408	0.0364803	6.33509e-35	Un1181	38786	50493	44639.5	558
ENSACAG00000001831	0.0103977	0.624992	0.0166366	5.2584e-32	0.0103931	0.70572	0.0147269	3.42282e-35	0.107994	0.658105	0.164099	3.18775e-15	3	120526260	120575533	120551000	510
ENSACAG00000001832	0.0955765	0.939376	0.101745	1.29513e-33	0.106175	1.04496	0.101607	1.72182e-34	0.115559	1.08966	0.106051	4.87247e-35	3	85359088	85414968	85387028	771
ENSACAG00000001834	0.132184	0.838902	0.157568	1.84173e-40	0.140072	0.871837	0.160663	8.09713e-40	0.144196	0.855819	0.168489	2.41706e-38	4	120834286	120853370	120843828	1239
ENSACAG00000001835	0.0326565	0.567512	0.0575433	1.30654e-15	0.0364025	0.654595	0.0556108	3.1319e-17	0.0438319	0.883148	0.0496314	6.76401e-21	2	42644787	42659035	42651911	357
ENSACAG00000001836	0.0912054	0.764038	0.119373	6.65874e-81	0.0915702	0.880896	0.103951	1.96155e-94	0.091434	0.851546	0.107374	4.43762e-91	1	204006022	204008419	204007000	2220
ENSACAG00000001838	0.0516887	0.633143	0.0816383	4.40928e-27	0.232032	1.21734	0.190606	8.64103e-20	0.0550311	0.637513	0.0863214	7.64181e-26	Un1454	1655	9471	5563	606
ENSACAG00000001840	0.0139666	1.1351	0.0123042	7.11715e-49	0.0222405	1.4829	0.014998	1.28639e-53	0.0139722	1.51019	0.00925196	1.41005e-56	Un0138	862157	876237	869197	555
ENSACAG00000001841	0.0210132	1.46446	0.0143488	7.86863e-96	0.0270045	1.27241	0.0212231	6.09324e-86	0.0250466	0.852997	0.029363	3.45525e-66	Un0193	938932	940252	939592	999
ENSACAG00000001844	0.106055	0.725941	0.146094	3.02517e-06	0.117795	0.949748	0.124028	7.25268e-08	0.12428	1.32102	0.0940786	1.72625e-09	Un0103	444252	468584	456418	168
ENSACAG00000001848	0.0770893	0.973321	0.0792023	2.80303e-30	0.0798726	1.04645	0.0763269	1.09878e-31	0.0889482	1.03563	0.0858883	2.86929e-29	2	54401921	54406386	54404200	561
ENSACAG00000001850	0.0237429	0.484378	0.0490172	2.26517e-21	0.0223064	0.641255	0.0347855	3.90879e-27	0.0180644	0.574746	0.0314303	1.47473e-26	Un0031	143640	156636	150138	480
ENSACAG00000001851	0.0197719	1.03712	0.0190643	6.09192e-43	0.0197269	1.05455	0.0187064	2.89417e-43	0.0925974	1.67915	0.0551453	5.67703e-38	Un0173	121625	181229	151427	531
ENSACAG00000001852	0.076004	0.914704	0.0830913	1.95251e-18	0.0918138	1.05592	0.0869518	3.64371e-19	0.230108	NA	NA	6.49355e-20	4	67584005	67603559	67593782	372
ENSACAG00000001853	0.0381521	0.45702	0.0834801	5.59763e-21	0.0459898	0.458648	0.100273	2.39153e-19	0.050082	0.401443	0.124755	7.23662e-17	4	36823968	36853505	36838700	675
ENSACAG00000001855	0.0493589	1.07049	0.0461089	1.45195e-19	0.0671852	0.575796	0.116682	1.62863e-10	0.0443509	0.719377	0.0616519	8.19501e-15	Un4044	610	3389	1999.5	276
ENSACAG00000001858	0.0282168	0.563595	0.0500658	7.80214e-40	0.0312857	0.614379	0.0509225	5.11487e-42	0.0313118	0.589838	0.0530854	1.87319e-40	1	44582365	44651375	44616870	888
ENSACAG00000001860	0.0409364	0.86646	0.0472455	1.2434e-26	0.0868832	1.14304	0.0760108	2.57418e-25	0.0425609	1.07495	0.0395933	4.58597e-30	Un3499	1410	9532	5471	414
ENSACAG00000001863	0.227747	0.865728	0.26307	1.28763e-19	0.233081	0.87755	0.265605	2.0496e-19	0.24472	0.93257	0.262414	3.02852e-20	1	124448004	124455837	124452000	1017
ENSACAG00000001864	0.0650477	0.690815	0.0941609	5.17544e-32	0.0701071	0.75815	0.0924713	1.21877e-33	0.0665113	0.816123	0.0814967	4.09496e-37	Un0011	1976703	2025701	2001202	780
ENSACAG00000001865	0.145138	0.782518	0.185475	8.11519e-49	0.148868	0.763947	0.194867	5.7604e-46	0.162759	0.750716	0.216805	8.71087e-42	1	180399508	180442908	180421208	1866
ENSACAG00000001866	NA	0.259669	0	NA	0.00306171	0.337269	0.00907794	1.92279e-17	NA	0.388092	0	NA	1	124468476	124476074	124472275	423
ENSACAG00000001870	0.038731	0.870497	0.044493	2.04904e-41	0.0923174	0.966518	0.0955155	2.88588e-31	0.0509938	0.899325	0.0567023	8.29851e-39	4	112621593	112639363	112630478	669
ENSACAG00000001874	0.0431021	0.825417	0.0522186	3.69283e-27	0.0892941	1.01178	0.0882543	2.54194e-24	0.0845097	0.874014	0.0966914	1.87906e-22	2	163775695	163796181	163785938	468
ENSACAG00000001879	0.0129115	1.42165	0.00908203	2.32724e-34	0.0211742	1.62618	0.0130208	2.99169e-34	0.0246419	1.93142	0.0127584	2.68882e-35	Un1848	2288	6013	4150.5	324
ENSACAG00000001880	0.0585699	0.605244	0.0967707	1.05104e-33	0.0731479	0.714792	0.102334	4.33464e-36	0.0616966	0.698165	0.0883697	3.73169e-38	2	42676592	42701741	42689200	894
ENSACAG00000001881	0.0103765	0.506356	0.0204925	3.62665e-31	0.00828441	0.600666	0.0137921	5.23288e-37	0.0177129	0.592887	0.0298756	2.52541e-33	Un0068	1398523	1428679	1413601	621
ENSACAG00000001885	0.184155	0.978763	0.188151	2.94033e-47	0.20301	1.09154	0.185986	2.27719e-48	0.198509	1.0522	0.188661	9.43028e-48	1	134285069	134294644	134290000	1623
ENSACAG00000001886	0.0228421	1.24583	0.0183348	8.77369e-101	0.0322478	1.2527	0.0257426	1.79686e-93	0.0455081	1.38193	0.0329309	1.3432e-91	Un0416	233050	248112	240581	1098
ENSACAG00000001889	0.0529852	1.12294	0.0471845	3.04811e-74	0.0726478	1.44121	0.0504075	7.819e-79	0.119884	1.31748	0.0909951	9.50026e-59	Un0435	59261	139265	99263	1119
ENSACAG00000001891	NA	0.823086	0	NA	0.00303302	1.25	0.00242642	1.52084e-45	0.00912393	1.52477	0.00598382	6.56433e-47	Un0231	310884	312858	311871	429
ENSACAG00000001892	0.0421508	0.72532	0.0581133	6.06177e-26	0.0874864	0.931598	0.0939101	9.61238e-24	0.161371	0.80233	0.201128	1.13222e-13	Un0059	1012452	1044758	1028605	471
ENSACAG00000001893	0.0522005	0.752272	0.0693905	1.83244e-39	0.107288	NA	NA	1.79123e-76	0.104035	NA	NA	4.64641e-73	Un0835	60355	86673	73514	822
ENSACAG00000001895	0.175682	1.64512	0.106789	1.43593e-18	0.167632	1.53809	0.108988	1.12041e-17	0.180566	2.26773	0.0796239	1.195e-20	Un0512	155870	161821	158846	342
ENSACAG00000001896	0.00780798	0.587982	0.0132793	7.22409e-21	0.00388917	0.649997	0.00598336	1.02745e-23	0.0117206	0.622336	0.0188332	9.34884e-21	2	54459532	54469883	54464700	336
ENSACAG00000001897	0.132298	0.552916	0.239273	6.18075e-15	0.139616	0.528666	0.264092	1.97763e-13	0.14243	0.551757	0.25814	2.67441e-14	Un0031	197	50748	25472.5	843
ENSACAG00000001900	0.125284	0.567364	0.220818	7.53508e-06	0.128358	NA	NA	4.09524e-24	0.130785	0.666559	0.196209	1.33224e-06	Un0747	78860	94879	86869.5	222
ENSACAG00000001901	0.187965	0.998086	0.188325	1.48672e-37	0.228795	1.6514	0.138546	4.80294e-51	0.207831	1.81302	0.114633	4.23228e-59	Un0145	692240	717691	704966	1326
ENSACAG00000001902	0.168496	NA	NA	2.66123e-62	0.180864	NA	NA	7.41291e-49	0.198858	2.29972	0.0864709	1.40708e-35	Un1072	860	23524	12192	639
ENSACAG00000001905	0.108179	1.55769	0.0694485	4.77457e-77	0.123168	1.80659	0.0681771	8.00263e-78	0.125684	1.62035	0.0775661	1.3855e-72	Un1016	8945	58844	33894.5	1203
ENSACAG00000001906	0.032803	0.783343	0.0418756	1.55061e-06	0.0496185	0.428302	0.115849	0.0013632	0.0582637	0.46404	0.125557	0.000397081	3	200663789	200664341	200664065	87
ENSACAG00000001908	0.108672	1.11895	0.0971201	1.13163e-14	0.155522	1.13885	0.136561	5.46849e-12	0.144409	1.43166	0.100868	7.1096e-15	Un0231	318088	330455	324272	291
ENSACAG00000001909	0.0288148	0.686815	0.0419542	1.12226e-41	0.0270755	0.82972	0.0326321	1.50295e-49	0.0304545	0.842538	0.0361461	1.56923e-48	3	30132849	30155424	30144100	777
ENSACAG00000001913	0.0514344	0.740307	0.0694771	7.67671e-22	0.0499207	0.776349	0.0643019	9.95512e-24	0.0543335	0.845631	0.0642521	6.62371e-24	4	67570010	67575697	67572900	444
ENSACAG00000001914	0.00852449	0.758731	0.0112352	3.33952e-22	0.00853076	1.67348	0.00509761	2.52027e-34	0.00854332	1.32393	0.006453	3.71639e-31	Un0231	337263	351751	344507	303
ENSACAG00000001916	0.0242505	0.98166	0.0247036	6.75054e-79	0.0290138	1.31933	0.0219912	4.20838e-91	0.0665891	1.15089	0.057859	5.38224e-66	Un0545	4185	11876	8030.5	1092
ENSACAG00000001918	0.00614317	0.836918	0.00734022	9.28335e-36	0.00307305	0.825049	0.00372468	6.87684e-37	0.00307345	0.883361	0.00347927	1.41798e-38	1	124520484	124546286	124533385	432
ENSACAG00000001920	NA	0.0997461	0	NA	NA	0.0997461	0	NA	NA	0.0997461	0	NA	1	134330068	134351746	134340907	162
ENSACAG00000001921	0.128039	0.743524	0.172206	2.04243e-14	0.156205	1.01041	0.154596	3.26917e-17	0.142013	1.09344	0.129878	2.03616e-19	2	163718542	163736038	163727290	483
ENSACAG00000001923	0.0573639	1.29517	0.0442906	2.55748e-30	0.0692465	NA	NA	7.45728e-48	0.0626732	NA	NA	2.13797e-46	3	70130505	70152992	70141700	420
ENSACAG00000001927	0.211933	1.03294	0.205175	0.000103192	0.223322	NA	NA	5.50158e-09	0.210829	NA	NA	2.13534e-10	Un0795	29415	58941	44178	123
ENSACAG00000001929	0.277158	0.574526	0.482412	0.327717	0.238733	0.315549	0.756563	0.583849	0.852929	NA	NA	0.00563139	2	54473218	54524439	54498800	42
ENSACAG00000001933	0.0411115	0.788436	0.0521431	3.07881e-21	0.0410572	0.830222	0.0494533	3.99793e-22	0.065937	0.842363	0.0782763	9.03184e-19	Un0872	1418	18431	9924.5	384
ENSACAG00000001938	0.0709934	0.748316	0.0948708	1.25073e-27	0.0858646	0.81153	0.105806	5.94823e-27	0.102677	0.902714	0.113743	1.22919e-27	Un0068	1445103	1454505	1449804	654
ENSACAG00000001939	0.0381835	0.755553	0.0505371	5.43298e-25	0.0475321	0.725403	0.0655251	4.21639e-22	0.0493084	0.758496	0.0650081	4.07422e-22	Un0358	125612	143540	134576	417
ENSACAG00000001941	0.0224697	1.26931	0.0177023	3.37828e-37	0.0290401	1.2601	0.0230458	2.11595e-35	0.028967	1.17806	0.0245887	6.50124e-34	1	243565628	243566042	243565835	411
ENSACAG00000001943	0.184393	0.942075	0.195731	7.78227e-29	0.201612	1.05402	0.191279	1.57113e-30	0.211273	1.15009	0.183701	8.39025e-32	Un0059	1197586	1207074	1202330	1035
ENSACAG00000001944	0.071409	0.545056	0.131012	1.51777e-13	0.0823169	0.608851	0.1352	3.46372e-14	0.0757632	0.65911	0.114948	7.14782e-17	3	85311599	85340479	85326039	504
ENSACAG00000001945	0.180123	1.07893	0.166945	4.16697e-11	0.227773	1.08332	0.210254	3.55757e-09	0.195143	1.2679	0.15391	1.64276e-12	Un0231	357079	372787	364933	291
ENSACAG00000001946	0.133028	0.476055	0.279438	3.70315e-05	0.143337	0.530142	0.270375	1.26486e-05	0.117822	0.540037	0.218173	9.55703e-07	1	243573985	243585219	243579602	306
ENSACAG00000001947	0.0235533	0.780493	0.0301775	1.22349e-79	0.030508	0.935505	0.0326112	1.39277e-85	0.0262473	0.809875	0.032409	2.14536e-79	4	120630666	120734978	120682822	1260
ENSACAG00000001949	0.0273149	0.895537	0.0305011	4.1055e-30	0.0461836	0.91791	0.0503139	9.4898e-27	0.0461103	0.830149	0.0555447	1.35697e-24	3	107357334	107378172	107367753	435
ENSACAG00000001951	0.0780315	0.615618	0.126753	3.20183e-18	0.0711928	0.664427	0.107149	3.90002e-21	0.0784476	0.817082	0.0960094	1.33278e-24	4	112340872	112346786	112343829	558
ENSACAG00000001952	0.146105	0.756274	0.19319	2.44048e-10	0.146222	0.773058	0.189148	1.44124e-10	0.160799	1.11345	0.144415	1.22317e-14	1	59441432	59442657	59442000	360
ENSACAG00000001954	0.0158208	0.46887	0.0337424	9.57089e-12	0.0158417	0.533612	0.0296878	3.71551e-13	0.0105144	0.501186	0.020979	2.75933e-13	1	88577990	88587496	88582743	249
ENSACAG00000001956	0.156914	0.65831	0.238358	1.77606e-23	0.208005	1.27604	0.163008	2.24664e-41	0.214616	1.39228	0.154148	1.53437e-43	Un0059	1307183	1357010	1332100	1194
ENSACAG00000001957	0.0817314	1.55204	0.0526608	1.02963e-10	0.100137	2.52546	0.0396509	1.84926e-11	0.0996926	NA	NA	6.05856e-15	Un0358	153775	154924	154350	138
ENSACAG00000001958	0.0347999	0.901067	0.0386208	5.28712e-57	0.0382635	1.02232	0.0374282	1.48503e-61	0.0355652	1.01286	0.0351136	1.01929e-62	1	44312830	44314233	44313500	906
ENSACAG00000001960	NA	1.22593	0	NA	0.0125926	1.80965	0.00695859	2.19519e-19	0.025635	1.06273	0.0241218	3.23391e-13	Un0145	732807	745138	738972	156
ENSACAG00000001961	0.0568774	0.98782	0.0575788	1.14123e-59	0.0631626	1.28662	0.0490919	7.16343e-69	0.0632296	1.37718	0.0459122	5.58232e-72	5	120425363	120427077	120426220	1020
ENSACAG00000001963	0.0837971	0.909034	0.0921826	3.22393e-26	0.116749	1.32744	0.0879505	7.68888e-30	0.127565	1.17965	0.108138	2.39878e-26	Un0687	130524	131133	130828	504
ENSACAG00000001966	0.0445856	0.960546	0.0464169	2.49911e-17	0.034535	0.73833	0.0467744	3.12424e-15	0.0498704	0.781501	0.0638136	2.88759e-14	1	44280356	44290380	44285368	267
ENSACAG00000001969	0.184214	1.37261	0.134207	1.53379e-05	0.161737	1.7194	0.0940661	2.22785e-07	0.1924	1.86534	0.103145	6.52493e-07	Un0053	1509930	1527444	1518687	105
ENSACAG00000001970	0.0756806	0.425133	0.178016	0.000258835	0.0843296	0.480773	0.175404	0.000130604	0.0975786	0.77158	0.126466	2.60193e-07	3	146493107	146516069	146504588	162
ENSACAG00000001972	0.032902	0.971566	0.0338649	3.03665e-41	0.0387654	1.15398	0.0335928	5.80888e-43	0.0373826	1.16039	0.0322156	4.52625e-45	Un0103	374001	409030	391516	600
ENSACAG00000001973	0.123913	0.88743	0.139631	3.82655e-44	0.142247	1.14986	0.123709	1.60572e-51	0.133031	1.04915	0.126799	2.01019e-49	1	134501046	134525047	134513000	1257
ENSACAG00000001974	0.141485	0.563797	0.25095	4.21499e-23	0.171932	0.619775	0.27741	1.77013e-21	0.164774	0.646721	0.254783	4.28396e-24	3	146452990	146465210	146459100	1374
ENSACAG00000001975	0.147717	1.86127	0.0793634	2.26981e-23	0.149519	1.82005	0.0821512	1.72423e-23	0.145438	NA	NA	3.84481e-31	Un1072	30070	50738	40404	402
ENSACAG00000001979	0.052772	0.519009	0.101679	6.98089e-38	0.0565349	0.666226	0.0848585	5.17792e-48	0.0519177	0.677608	0.076619	6.224e-50	5	120389786	120418932	120404359	1113
ENSACAG00000001980	0.176887	1.05626	0.167465	4.11842e-13	0.236584	1.25121	0.189084	2.18987e-11	0.249283	1.40645	0.177243	2.51504e-12	Un0605	1525	15972	8748.5	342
ENSACAG00000001981	0.0994695	0.9554	0.104113	2.03339e-56	0.115261	1.0604	0.108695	7.10324e-57	0.102402	1.11605	0.0917546	2.58049e-64	Un0618	47693	66058	56875.5	1239
ENSACAG00000001983	0.0133184	1.45389	0.00916056	5.4909e-29	0.0133435	1.42363	0.00937283	8.36226e-29	0.00888594	1.21086	0.00733856	9.57617e-28	Un5547	862	4774	2818	288
ENSACAG00000001984	0.0875887	0.524238	0.167078	7.54351e-20	0.075334	0.761164	0.0989722	7.40944e-33	0.124792	0.757153	0.164817	6.38564e-24	4	112229220	112248152	112238686	762
ENSACAG00000001988	0.248049	1.37416	0.18051	1.419e-11	0.255204	1.37544	0.185544	2.78149e-11	0.266375	1.31059	0.203249	1.73479e-10	3	120696811	120732967	120714889	375
ENSACAG00000001991	0.0232019	0.46842	0.0495322	6.42863e-12	0.0232061	0.562318	0.0412686	4.5286e-14	0.0232019	0.597147	0.0388546	8.00641e-15	Un0009	2314422	2340205	2327310	282
ENSACAG00000001994	0.0605538	0.799201	0.0757679	1.3729e-54	0.121154	0.797925	0.151836	6.0686e-37	0.0725688	0.729861	0.0994283	6.04e-46	Un1454	11649	27062	19355.5	1128
ENSACAG00000001995	0.00916788	0.416759	0.021998	7.40985e-57	0.231898	0.971236	0.238766	3.3401e-29	0.00769997	0.512946	0.0150113	5.32506e-69	Un0018	3288705	3434056	3361380	1335
ENSACAG00000001996	0.0724493	0.542462	0.133557	3.42268e-15	0.0729553	0.522146	0.139722	1.24812e-14	0.0866941	0.615392	0.140876	2.21744e-15	3	85287308	85308869	85298100	471
ENSACAG00000001998	0.0522809	1.06604	0.0490421	4.9453e-43	0.0584052	1.27949	0.0456472	8.94244e-47	0.103853	1.01303	0.102517	1.41534e-31	Un0416	213734	225685	219710	666
ENSACAG00000001999	0.058953	0.570332	0.103366	8.37502e-27	0.0623715	0.643092	0.0969869	1.49912e-29	0.0615541	0.632114	0.0973781	8.21515e-30	Un0618	68856	76396	72626	780
ENSACAG00000002000	0.188058	0.866586	0.21701	7.71732e-12	0.17859	1.01623	0.175737	7.67636e-15	0.17474	1.02819	0.16995	1.60265e-15	2	42706855	42720654	42713800	456
ENSACAG00000002001	0.147119	0.679093	0.216641	0.000189767	0.145369	0.911617	0.159463	4.49581e-06	0.174487	0.833489	0.209346	0.000149422	3	200539348	200542669	200541000	141
ENSACAG00000002002	0.200281	1.09123	0.183537	0.00107745	0.244509	1.41056	0.173342	0.000558558	0.138918	0.83541	0.166288	0.000513966	Un4404	3385	6532	4958.5	78
ENSACAG00000002003	0.0574056	0.529988	0.108315	1.90518e-31	0.0703196	0.544504	0.129144	1.61869e-28	0.079774	0.601492	0.132627	6.67329e-30	Un0068	1472253	1479189	1475721	945
ENSACAG00000002006	0.0385801	0.413581	0.0932829	2.60612e-06	0.0880171	0.684619	0.128564	2.69482e-07	0.104795	0.696582	0.150442	1.02329e-06	Un0231	373377	376520	374948	177
ENSACAG00000002007	0.168595	1.47932	0.113967	7.0889e-12	0.163398	1.81323	0.0901146	6.62456e-13	0.131574	2.21941	0.0592835	9.83534e-16	Un0605	29768	32504	31136	204
ENSACAG00000002008	0.209808	0.806688	0.260086	3.44125e-08	0.199634	0.68638	0.29085	5.94143e-07	0.234076	0.850236	0.275307	6.04393e-08	Un0065	1986046	2009074	1997560	372
ENSACAG00000002009	0.0341167	0.925247	0.036873	2.72066e-46	0.0323841	1.02717	0.0315276	2.04261e-50	0.050364	0.846734	0.0594803	1.45676e-37	1	124575333	124602731	124589032	708
ENSACAG00000002011	0.0176457	0.626035	0.0281864	3.94677e-64	0.019799	0.69626	0.0284363	2.01301e-68	0.209349	0.849598	0.24641	1.84904e-24	2	54534329	54548661	54541495	1197
ENSACAG00000002012	0.0520466	0.362948	0.143399	9.06547e-23	0.0564718	0.324301	0.174134	8.08022e-19	0.0563775	0.314276	0.179388	5.70484e-18	5	76840081	76863247	76851664	1089
ENSACAG00000002013	0.134599	1.1521	0.116829	8.9795e-14	0.130938	0.801554	0.163355	2.68017e-10	0.125703	0.744263	0.168896	7.63202e-10	Un0758	109497	116025	112761	273
ENSACAG00000002014	0.0285617	1.50613	0.0189637	9.40348e-39	0.0379438	1.72588	0.0219852	5.80737e-39	0.0473181	1.5379	0.030768	5.10166e-35	Un0795	60111	101525	80818	426
ENSACAG00000002015	0.107902	0.714817	0.15095	5.65955e-11	0.111046	0.832357	0.133412	3.46826e-12	0.128677	0.921354	0.13966	1.1019e-12	1	246398916	246401707	246400000	297
ENSACAG00000002017	0.0502705	0.667708	0.0752881	2.25168e-53	0.0590909	0.740671	0.0797802	3.43768e-55	0.075585	0.74912	0.100898	3.59215e-49	1	246501086	246505740	246503413	1254
ENSACAG00000002018	0.00609307	1.02991	0.00591614	4.16046e-39	0.00304086	1.45782	0.0020859	3.1636e-48	0.00611898	1.54421	0.00396254	3.54808e-48	Un5156	1034	4760	2897	426
ENSACAG00000002019	0.0435509	0.497664	0.0875106	4.94284e-24	0.0474842	0.443577	0.107048	2.19044e-20	0.0502847	0.502774	0.100015	3.0056e-22	1	59510355	59514443	59512399	708
ENSACAG00000002023	0.168003	0.722979	0.232376	4.62885e-15	0.192261	0.76674	0.250752	3.21091e-14	0.209023	0.757007	0.276117	2.33189e-12	3	30090329	30093133	30091731	669
ENSACAG00000002029	0.0671951	0.802473	0.083735	7.57563e-19	0.06861	0.914947	0.0749879	2.00137e-21	0.0786219	0.921642	0.0853064	3.03382e-20	4	85655500	85681653	85668600	414
ENSACAG00000002031	0.0279466	0.562481	0.0496845	2.38414e-112	0.0290742	0.630784	0.0460922	3.74081e-124	0.0357465	0.639145	0.0559286	7.90384e-118	2	163592633	163687981	163640307	2475
ENSACAG00000002032	0.0451436	0.54687	0.0825491	1.24949e-21	0.0699781	0.543943	0.12865	1.43936e-17	0.0333718	0.558008	0.0598053	8.83993e-25	2	42809719	42879825	42844772	570
ENSACAG00000002034	0.132647	0.71025	0.186762	1.29252e-21	0.144567	0.721007	0.200507	3.77507e-20	0.223323	0.817305	0.273243	1.17966e-15	3	107402198	107438348	107420273	843
ENSACAG00000002036	0.152536	0.550823	0.276924	0.019917	0.124141	0.858674	0.144573	0.00079827	0.169462	0.731878	0.231545	0.00896078	Un0605	132740	148676	140708	72
ENSACAG00000002037	0.0225864	0.371902	0.060732	1.44298e-15	0.0309835	0.579058	0.0535067	2.07424e-21	0.115188	0.65695	0.175337	2.7655e-13	3	200475391	200511911	200493651	441
ENSACAG00000002042	0.121631	0.956492	0.127163	6.89181e-31	0.123307	0.934625	0.131932	1.27589e-30	0.125387	0.957113	0.131005	5.467e-31	1	243672878	243682377	243678000	732
ENSACAG00000002043	0.119434	0.665555	0.17945	2.05747e-06	0.10671	0.755195	0.141302	4.33988e-08	0.142043	0.790605	0.179664	8.09867e-07	Un0046	585443	644687	615065	201
ENSACAG00000002045	0.0239088	0.623396	0.0383526	3.20347e-37	0.0541727	0.724188	0.0748048	3.79978e-33	0.0346177	0.566602	0.0610971	6.97914e-30	1	82159804	82177456	82168630	693
ENSACAG00000002046	0.074102	0.937649	0.0790295	1.53117e-31	0.073288	1.00139	0.0731863	4.55265e-33	0.0749583	0.924412	0.0810875	2.96579e-30	Un0214	813592	831622	822607	600
ENSACAG00000002047	0.0525571	0.72911	0.072084	2.92423e-33	0.0634649	0.631325	0.100527	9.07294e-27	0.0721827	0.69666	0.103612	6.67414e-27	5	112754263	112795980	112775000	684
ENSACAG00000002048	0.0604301	0.779018	0.0775722	6.46271e-25	0.0724019	1.00958	0.0717148	1.29066e-29	0.0772732	0.985948	0.0783745	5.26367e-28	4	79482380	79484498	79483439	531
ENSACAG00000002050	0.0714681	0.578166	0.123612	8.07971e-36	0.0740346	0.690061	0.107287	3.39379e-41	0.0712399	0.639792	0.111349	4.45026e-40	3	30018407	30086640	30052500	1125
ENSACAG00000002052	0.0401013	0.721908	0.0555491	5.82431e-78	0.0381092	0.765592	0.0497774	3.13826e-83	0.0385757	0.736797	0.052356	1.75046e-79	1	44268879	44274784	44271800	1524
ENSACAG00000002054	0.0455462	1.07148	0.0425078	4.00652e-50	0.0428022	1.32289	0.0323552	1.10394e-57	0.111112	1.3711	0.0810386	1.33782e-41	Un0009	2372369	2387382	2379880	741
ENSACAG00000002056	0.0643999	0.0960546	0.670451	0.540716	0.0982382	0.097683	1.00568	0.944223	0.0811733	0.208115	0.39004	0.182761	4	36732217	36789537	36760877	87
ENSACAG00000002061	0.0359863	0.624205	0.0576513	3.03844e-41	0.0469907	0.720428	0.0652261	4.41117e-44	0.0391667	0.757019	0.0517381	6.22038e-48	Un0173	501671	510157	505914	867
ENSACAG00000002062	0.0803899	0.727031	0.110573	7.51377e-14	0.0666234	0.874913	0.0761486	2.82516e-17	0.0683555	1.02049	0.0669827	6.82539e-20	1	173713958	173729810	173721884	354
ENSACAG00000002064	0.0898004	0.488357	0.183883	1.9175e-11	0.0950681	0.586335	0.162139	8.36065e-14	0.112823	0.508231	0.221992	3.80495e-10	5	76876211	76876769	76876490	525
ENSACAG00000002066	0.109762	1.10895	0.0989778	7.252e-23	0.120563	1.11436	0.10819	3.63414e-22	0.13862	1.16942	0.118538	9.3415e-21	5	76900991	76930891	76915941	468
ENSACAG00000002067	NA	0.457057	0	NA	0.652167	NA	NA	0.0760195	0.0380054	0.187929	0.202232	0.562218	Un0011	2588387	2828895	2708641	33
ENSACAG00000002072	0.0730062	0.534391	0.136616	2.38194e-16	0.123914	0.805021	0.153926	1.85155e-18	0.0794475	0.690046	0.115134	3.20128e-21	1	180351894	180378473	180365000	549
ENSACAG00000002073	0.0349588	0.565495	0.0618198	7.21009e-59	0.0709002	0.646584	0.109653	1.76015e-48	0.0871703	0.578672	0.150639	2.03138e-37	1	96492078	96525490	96508784	1398
ENSACAG00000002074	0.0144323	0.743619	0.0194082	1.06699e-64	0.0197556	0.819376	0.0241105	8.94909e-68	0.0177632	0.77174	0.0230171	3.174e-65	4	79474834	79475828	79475331	990
ENSACAG00000002076	0.111627	0.79827	0.139837	2.62251e-15	0.130825	1.01404	0.129014	2.79152e-17	0.127914	0.834041	0.153367	4.20413e-14	4	79463368	79466408	79464888	408
ENSACAG00000002077	0.0247174	0.487773	0.050674	3.19716e-08	0.0246661	0.747997	0.0329761	1.09111e-11	0.0329779	0.973533	0.0338745	2.79888e-13	1	246640716	246674042	246657379	168
ENSACAG00000002080	0.0364449	1.03963	0.0350555	5.55222e-09	0.0366178	1.16508	0.0314294	1.1444e-09	0.0366178	1.008	0.036327	7.46207e-09	Un0065	1872866	1880494	1876680	111
ENSACAG00000002081	0.0681757	0.735693	0.0926687	2.65523e-23	0.0683253	0.592575	0.115302	1.037e-17	0.0772925	0.687905	0.112359	1.67696e-19	Un0214	837734	853503	845618	492
ENSACAG00000002085	0.0662763	0.621888	0.106573	1.12031e-14	0.0866855	0.743093	0.116655	1.14104e-14	0.0849743	0.969019	0.0876911	1.13628e-19	1	44261785	44267955	44264870	378
ENSACAG00000002086	0.076773	0.830831	0.092405	3.24706e-35	0.107194	0.870836	0.123093	4.95802e-31	0.0969055	0.910092	0.106479	6.9032e-34	1	134738765	134812879	134775822	786
ENSACAG00000002088	0.315663	0.680357	0.463967	8.36448e-27	0.356885	0.693557	0.514572	1.01542e-20	0.357543	0.686971	0.520463	4.78065e-20	Un0174	235457	265366	250412	4182
ENSACAG00000002092	0.00964032	0.627851	0.0153545	3.09725e-66	0.0130752	0.637131	0.020522	4.28717e-64	0.0753955	0.615248	0.122545	1.41007e-34	5	120272287	120306520	120289000	1119
ENSACAG00000002094	0.06618	0.990892	0.0667883	1.17555e-50	0.0809109	1.35814	0.0595747	2.46071e-57	0.0808537	1.13128	0.0714713	1.24412e-51	1	246677430	246691120	246684275	882
ENSACAG00000002096	0.190594	1.01486	0.187805	5.09114e-14	0.175005	1.05019	0.166641	4.97149e-16	0.198693	1.30807	0.151898	3.53855e-17	5	112822526	112824130	112823328	492
ENSACAG00000002097	0.105021	NA	NA	2.35172e-12	0.124957	1.19137	0.104885	2.29556e-06	0.0974167	4.13356	0.0235673	1.59036e-10	Un0106	595392	679417	637404	105
ENSACAG00000002100	0.129353	0.763498	0.169421	4.19e-25	0.114087	0.793268	0.143818	2.26229e-28	0.169547	0.833351	0.203452	1.16384e-21	5	112830655	112853851	112842253	837
ENSACAG00000002101	0.0327964	0.565057	0.0580408	5.19695e-26	0.0290777	0.673368	0.0431825	6.71006e-31	0.0302352	0.58792	0.0514274	1.38827e-27	Un0618	85621	89786	87703.5	558
ENSACAG00000002102	0.0392727	0.504944	0.0777763	6.63934e-24	0.0326911	0.474042	0.0689624	7.58337e-24	0.0270251	0.456731	0.0591707	1.23289e-23	1	244009005	244060646	244035000	633
ENSACAG00000002105	0.142409	0.85528	0.166505	2.48659e-29	0.15329	0.985755	0.155505	8.39169e-33	0.182411	1.00918	0.180752	4.42018e-29	1	222904618	222931842	222918230	936
ENSACAG00000002107	0.0563678	0.776688	0.0725746	7.73935e-47	0.0571295	0.751277	0.0760432	7.88941e-46	0.14355	0.885423	0.162126	2.81861e-31	Un0114	53917	67772	60844.5	1011
ENSACAG00000002110	0.062719	1.53873	0.0407603	2.38401e-12	0.103725	1.05197	0.0986003	2.38694e-08	0.0627408	1.17528	0.0533836	1.22653e-10	5	112859549	112873724	112867000	150
ENSACAG00000002114	0.00580647	0.359442	0.0161541	2.46775e-54	0.00483479	0.380259	0.0127145	2.52465e-60	0.010662	0.414896	0.0256979	8.48397e-57	1	44225657	44243831	44234744	1356
ENSACAG00000002115	0.0459198	0.86302	0.0532083	1.73046e-37	0.0679662	0.973656	0.0698051	2.343e-35	0.0606565	0.998169	0.0607678	2.55712e-38	1	222941181	222963142	222952000	669
ENSACAG00000002117	0.0570923	0.519406	0.109918	4.43821e-37	0.068127	0.571482	0.119211	1.31307e-37	0.0677433	0.664837	0.101895	2.15766e-44	1	173642971	173644267	173643619	1161
ENSACAG00000002118	0.17171	0.678689	0.253002	5.3252e-25	0.194312	0.690792	0.281288	1.39847e-22	0.192065	0.672721	0.285504	5.04218e-22	1	60001681	60023650	60012700	1410
ENSACAG00000002119	0.0178392	1.10055	0.0162093	8.998e-18	0.0178392	1.20577	0.0147948	1.11146e-18	0.0250954	1.20577	0.0208127	9.94249e-18	6	59671432	59699435	59685400	186
ENSACAG00000002121	0.110128	0.678431	0.162328	8.57878e-06	0.161641	0.874333	0.184874	7.25951e-06	0.166727	0.620531	0.268684	0.00106541	1	173582126	173585828	173583977	165
ENSACAG00000002122	0.0237561	0.797899	0.0297733	1.26211e-47	0.0237676	0.942566	0.0252158	4.91164e-54	0.0219087	0.964148	0.0227234	9.3486e-56	1	173464732	173535347	173500000	729
ENSACAG00000002123	0.00416414	0.651748	0.00638919	2.46454e-126	0.00346842	0.703863	0.00492769	2.49838e-135	0.00730181	0.737801	0.00989672	1.17886e-133	Un0065	1847349	1869826	1858590	1872
ENSACAG00000002125	0.044859	0.487209	0.0920733	6.52945e-18	0.0340521	0.60299	0.056472	1.22004e-24	0.0908789	0.516297	0.176021	2.88319e-13	1	246824266	246901631	246863000	516
ENSACAG00000002126	0.0217017	0.641332	0.0338385	1.04001e-33	0.0217036	0.641045	0.0338566	1.06278e-33	0.0603154	0.630055	0.0957303	1.07828e-23	Un0618	92913	98724	95818.5	609
ENSACAG00000002128	0.0149968	0.487111	0.0307872	9.33651e-52	0.0228759	0.618335	0.036996	8.48963e-58	0.0270129	0.628295	0.042994	2.74276e-55	Un0957	8655	68224	38439.5	1116
ENSACAG00000002129	0.0510863	1.01202	0.0504794	6.25504e-66	0.061369	1.00411	0.0611176	4.1179e-60	0.0581346	1.0622	0.0547304	1.39798e-64	4	120554050	120582599	120568000	1095
ENSACAG00000002133	0.122663	1.16311	0.105461	5.69847e-11	0.195759	1.87768	0.104255	2.67412e-11	0.157572	1.60301	0.098298	3.06355e-12	Un4296	719	7592	4155.5	201
ENSACAG00000002138	0.245901	0.668812	0.367668	0.00107175	0.280525	0.683514	0.410416	0.00272685	0.262118	0.845025	0.31019	5.87247e-05	Un1138	34370	49910	42140	240
ENSACAG00000002142	0.106007	0.41388	0.256129	4.43451e-07	0.112934	0.417801	0.270306	5.60834e-07	0.116576	0.454057	0.256744	1.51943e-07	1	60256745	60278336	60267500	420
ENSACAG00000002143	0.0587316	0.734383	0.0799741	2.01355e-37	0.0647412	0.829936	0.0780074	6.95092e-40	0.0662453	0.969689	0.068316	4.13128e-45	Un0173	549956	579116	564536	849
ENSACAG00000002144	0.0844904	0.83419	0.101284	8.07013e-33	0.106524	1.00752	0.105729	5.21845e-35	0.112382	0.967094	0.116206	1.25804e-32	4	118598703	118605396	118602000	765
ENSACAG00000002145	0.0658683	1.35582	0.0485819	3.44067e-09	0.059015	0.739601	0.0797931	7.40812e-07	0.072294	1.31817	0.0548443	2.15638e-09	Un0289	2356	5600	3978	108
ENSACAG00000002150	0.135447	0.761905	0.177774	1.98413e-14	0.150714	0.945175	0.159456	2.18896e-17	0.166488	0.865664	0.192324	5.56401e-14	4	112171437	112182421	112176929	477
ENSACAG00000002152	0.113858	0.257277	0.442549	0.0240616	0.122599	0.307233	0.399042	0.00592262	0.106455	0.314426	0.33857	0.000923935	1	60350732	60371354	60361043	315
ENSACAG00000002156	0.1268	0.765291	0.165688	5.52685e-27	0.126696	1.14516	0.110636	6.44971e-41	0.236075	1.12214	0.21038	1.43681e-24	3	87086865	87197127	87141996	933
ENSACAG00000002159	0.0803049	0.327077	0.245523	2.40442e-06	0.0777423	0.458633	0.169509	1.69955e-10	0.0768361	0.514492	0.149344	6.38548e-12	4	36452815	36460870	36456800	417
ENSACAG00000002160	0.207663	1.13453	0.183039	3.57941e-15	0.176353	1.12721	0.156451	4.03199e-17	0.195354	1.06357	0.183678	5.93234e-15	Un0214	899251	900013	899632	447
ENSACAG00000002161	0.110744	1.04946	0.105524	1.6623e-35	0.107761	1.25973	0.0855426	1.63955e-42	0.126449	1.38286	0.0914401	9.6248e-42	Un0416	190912	203020	196966	747
ENSACAG00000002163	0.00348306	0.365999	0.00951658	2.78258e-17	0.00348255	0.402027	0.00866248	1.02036e-18	0.00348306	0.401787	0.00866892	1.03623e-18	Un0009	2424525	2440672	2432600	381
ENSACAG00000002165	0.0615614	0.895287	0.0687617	1.62893e-49	0.0795959	1.01544	0.078386	5.22819e-49	0.0788902	0.965427	0.0817153	1.30574e-46	4	118755335	118766205	118760770	933
ENSACAG00000002172	0.032438	0.760293	0.0426651	6.80002e-23	0.0464655	0.703211	0.0660762	4.3081e-19	0.0447248	0.656486	0.0681276	1.37081e-17	3	156983820	157074463	157029000	384
ENSACAG00000002175	0.0890052	0.803286	0.110801	1.92521e-107	0.111932	0.921632	0.12145	1.41449e-107	0.0983085	1.04363	0.0941983	1.42337e-130	Un0618	105814	133195	119504	2637
ENSACAG00000002178	0.0672202	0.519448	0.129407	2.0183e-10	0.0747534	0.568058	0.131595	1.6453e-10	0.0702231	0.429058	0.163668	6.02677e-08	1	60373513	60391493	60382503	315
ENSACAG00000002180	0.122788	2.58194	0.0475566	7.93242e-53	0.133035	2.77054	0.0480178	1.29013e-51	0.1475	2.4572	0.0600275	1.56461e-47	Un0289	50250	66992	58621	744
ENSACAG00000002181	0.138598	0.814971	0.170065	1.49711e-17	0.135963	0.792558	0.171549	3.06462e-17	0.23825	0.820197	0.290479	2.8324e-10	1	244390318	244404394	244397356	585
ENSACAG00000002183	NA	0.0676437	0	NA	NA	0.690028	0	NA	NA	0.690028	0	NA	4	79233654	79248588	79241121	192
ENSACAG00000002184	0.107685	0.659468	0.163291	7.56196e-07	0.120502	0.848529	0.142013	8.55432e-08	0.104537	0.561775	0.186083	1.48606e-05	1	60521116	60560837	60541000	189
ENSACAG00000002186	0.0522554	0.295365	0.176918	7.95253e-08	0.0643543	0.325425	0.197754	9.82099e-08	0.073714	0.337969	0.218109	2.14746e-07	4	78998807	78999736	78999300	459
ENSACAG00000002188	0.035943	0.900316	0.0399227	2.91307e-26	0.0561537	0.779304	0.0720563	4.87513e-20	0.073418	0.885453	0.0829158	5.129e-20	2	117754711	117771891	117763301	405
ENSACAG00000002192	0.0809671	0.53546	0.15121	3.22468e-15	0.0994258	0.711041	0.139831	1.12019e-18	0.105799	0.732091	0.144516	6.69951e-19	5	112889977	112904029	112897003	558
ENSACAG00000002194	0.231037	0.812824	0.28424	0.00103297	0.183497	0.781187	0.234895	6.71737e-05	0.183561	0.77971	0.235422	6.83462e-05	4	112161781	112167398	112165000	162
ENSACAG00000002197	0.110552	0.544381	0.203078	2.52106e-09	0.10539	0.67689	0.155697	3.29685e-12	0.109364	0.640865	0.170651	3.19678e-11	4	78657816	78718393	78688100	393
ENSACAG00000002200	0.0063172	0.996159	0.00634156	1.3476e-35	0.0126604	1.01296	0.0124984	1.37748e-33	0.0190656	1.28209	0.0148707	2.04101e-36	Un0231	471109	482783	476946	405
ENSACAG00000002204	0.0315583	0.838639	0.0376304	3.95063e-70	0.0352011	0.956196	0.0368137	2.13633e-75	0.0388894	0.940234	0.0413614	1.95006e-72	4	129604681	129617408	129611000	1116
ENSACAG00000002210	0.195291	0.920614	0.212131	3.40384e-41	0.232902	0.954867	0.24391	3.62592e-35	0.226255	1.07801	0.209882	1.49707e-42	4	112148910	112161560	112155235	1623
ENSACAG00000002214	0.0582482	0.820177	0.0710191	1.93219e-33	0.0656304	0.949195	0.0691432	9.84987e-37	0.0658999	0.909151	0.0724851	1.79936e-35	1	88508322	88543051	88525700	654
ENSACAG00000002222	0.0377373	0.636568	0.0592824	3.84176e-69	0.0489911	0.679824	0.0720643	9.51513e-67	0.0407278	0.670517	0.0607409	2.48252e-71	1	247088004	247208375	247148000	1563
ENSACAG00000002223	0.0839983	1.00211	0.0838212	1.07436e-16	0.10281	1.36747	0.0751824	1.70406e-19	0.131836	1.13791	0.115858	1.55957e-14	4	36423898	36424240	36424069	333
ENSACAG00000002224	0.0300174	0.541074	0.0554775	2.86678e-40	0.0328631	0.490723	0.0669687	2.01361e-35	0.121844	0.881076	0.13829	4.81573e-34	Un0011	3104848	3118899	3111870	963
ENSACAG00000002227	0.0415393	0.831359	0.0499656	1.8533e-24	0.0339645	0.880229	0.0385859	6.68461e-28	0.0506075	0.847145	0.0597389	4.06158e-23	5	120263717	120268239	120265978	438
ENSACAG00000002228	0.028646	0.650864	0.0440122	2.8226e-66	0.0321496	0.735849	0.0436905	3.26161e-72	0.0306602	0.746	0.0410994	6.58757e-75	4	120478306	120497193	120488000	1326
ENSACAG00000002229	0.0402962	0.61037	0.0660194	9.99564e-16	0.0517054	0.701762	0.0736793	2.27926e-16	0.0671145	0.851418	0.0788267	1.64801e-17	Un0106	714400	718931	716666	357
ENSACAG00000002232	0.0365665	1.35303	0.0270256	9.96623e-13	0.0458619	NA	NA	3.99555e-16	0.106144	4.12674	0.0257211	1.57387e-12	5	112907034	112961827	112934000	144
ENSACAG00000002234	0.0232697	1.01528	0.0229195	2.24105e-58	0.0359763	1.22939	0.0292634	1.26908e-60	0.0394353	1.01266	0.0389422	4.5923e-52	3	187332071	187332857	187332464	780
ENSACAG00000002239	0.0500692	0.794372	0.0630299	1.74543e-68	0.0600825	0.949922	0.06325	3.62872e-75	0.0774319	0.95809	0.080819	6.7256e-68	6	7333621	7356484	7345050	1326
ENSACAG00000002240	0.187498	0.766077	0.244751	1.38534e-10	0.190779	0.683555	0.279098	6.4662e-09	0.191663	0.751111	0.255172	2.60336e-10	4	53908285	53909994	53909100	471
ENSACAG00000002241	0.107079	0.835621	0.128143	1.42028e-14	0.141082	1.11294	0.126765	9.60413e-17	0.128575	1.22941	0.104583	4.704e-19	4	53912182	53922889	53917500	384
ENSACAG00000002242	0.0312107	0.704501	0.0443018	5.92011e-42	0.0364478	0.670042	0.0543964	2.3865e-38	0.033819	0.638287	0.052984	7.80543e-37	1	44188243	44207188	44197700	777
ENSACAG00000002245	0.0176944	0.937839	0.0188672	1.06989e-17	0.0529195	1.09716	0.0482332	1.53912e-16	0.0297881	0.800921	0.0371923	6.35798e-16	6	3902631	3908912	3905770	222
ENSACAG00000002246	0.0889846	0.967805	0.0919448	2.49674e-10	0.108362	0.814405	0.133057	1.89371e-08	0.108329	0.543741	0.199228	3.56592e-05	3	187424037	187438773	187431405	189
ENSACAG00000002249	0.0642916	0.501481	0.128204	9.27473e-14	0.0722871	0.499201	0.144805	2.7115e-12	0.0822746	0.55668	0.147795	6.07677e-13	5	120217867	120227342	120223000	438
ENSACAG00000002252	NA	0.284772	0	NA	NA	0.259544	0	NA	0.00271515	0.271819	0.00998882	9.89013e-17	1	60707885	60734555	60721220	483
ENSACAG00000002256	0.044659	0.585198	0.0763143	1.38831e-29	0.0651137	0.628866	0.103541	7.97425e-27	0.0613675	0.685076	0.0895777	2.96313e-30	5	64007390	64018564	64012977	744
ENSACAG00000002258	0.022694	1.82281	0.01245	1.84028e-30	0.0227477	1.1401	0.0199524	1.64348e-24	0.0273715	1.07558	0.0254481	7.68961e-23	Un2355	641	1379	1010	288
ENSACAG00000002260	0.0555919	1.25431	0.0443205	1.04948e-125	0.0752529	1.45247	0.0518102	1.0912e-123	0.0785898	2.17928	0.0360622	1.6659e-146	Un0138	384181	451102	417642	1764
ENSACAG00000002264	0.103875	0.662778	0.156726	1.67822e-15	0.199787	0.98713	0.202391	1.00097e-14	0.115042	0.858904	0.133941	8.20951e-19	Un2355	10041	14759	12400	483
ENSACAG00000002265	NA	0.255118	0	NA	NA	0.416748	0	NA	0.0326878	0.515298	0.0634347	6.65831e-14	6	3958465	3971570	3965020	330
ENSACAG00000002267	0.0617756	0.473275	0.130528	8.44998e-13	0.139522	0.585707	0.238212	6.66342e-09	0.0778675	0.58929	0.132138	1.79684e-14	1	148791620	148873413	148833000	444
ENSACAG00000002268	0.0875343	0.623888	0.140305	1.14006e-35	0.102818	0.773872	0.132862	7.20731e-42	0.200198	0.821359	0.24374	2.66273e-25	5	120040212	120161711	120101000	1206
ENSACAG00000002269	0.177583	0.64987	0.27326	3.04354e-11	0.204278	0.838428	0.243644	5.90525e-14	0.194814	0.975939	0.199617	4.2354e-17	3	29872559	29888836	29880700	627
ENSACAG00000002270	0.0925526	0.64718	0.143009	4.00519e-99	0.107554	0.752775	0.142876	7.27461e-107	0.101541	0.77215	0.131505	7.01833e-114	2	50269293	50288264	50278800	3402
ENSACAG00000002271	0.0282046	0.678049	0.0415967	1.26023e-31	0.0334326	0.817973	0.0408725	1.60915e-34	1.23387	3.27337	0.376942	0.00496796	1	134864565	134959468	134912000	603
ENSACAG00000002273	0.165501	1.04418	0.158499	5.83511e-08	0.209449	1.65346	0.126673	6.73496e-10	0.19407	1.25856	0.1542	1.87167e-08	Un0530	13834	22759	18296.5	201
ENSACAG00000002275	0.0639214	0.461093	0.13863	1.54055e-09	0.0883302	0.730402	0.120934	1.16908e-12	0.0684575	0.751257	0.091124	2.50961e-15	6	35397117	35431227	35414172	327
ENSACAG00000002276	0.147794	0.753435	0.19616	3.08147e-17	0.136322	0.81888	0.166474	2.2921e-20	0.191349	0.875437	0.218575	5.77639e-17	Un0011	3164015	3190301	3177158	684
ENSACAG00000002277	0.00765525	0.175195	0.0436956	1.05358e-06	0.00765525	0.157466	0.0486154	4.75656e-06	0.0449781	0.285064	0.157783	1.58501e-06	4	53937391	53941505	53939448	333
ENSACAG00000002280	0.126079	1.20373	0.10474	7.49357e-13	0.113791	1.45278	0.0783263	1.91804e-15	0.123624	1.16801	0.105842	2.69982e-12	Un0289	97493	114336	105914	240
ENSACAG00000002281	0.0700577	0.904816	0.0774275	2.61222e-59	0.0912391	0.848733	0.1075	1.41518e-48	0.111562	0.979805	0.113861	1.68073e-50	Un0231	597201	654956	626078	1161
ENSACAG00000002283	0.131192	0.810251	0.161915	0.0434845	0.216722	0.584987	0.370474	0.108121	1.0861	NA	NA	0.0814652	Un1214	8153	15830	11991.5	33
ENSACAG00000002284	0.038541	0.434475	0.088707	9.70688e-39	0.0317811	0.44858	0.0708482	4.76473e-43	0.032274	0.454325	0.0710373	1.04986e-42	2	117778137	117820708	117799000	1266
ENSACAG00000002288	0.0117503	0.286074	0.0410743	3.89756e-07	0.0116787	0.355854	0.0328187	1.23074e-08	0.0116787	0.355854	0.0328187	1.23074e-08	5	119789572	119791339	119790000	222
ENSACAG00000002289	NA	0.778182	0	NA	NA	0.748545	0	NA	0.00209845	0.782407	0.00268204	9.96613e-77	1	44174620	44184122	44179371	933
ENSACAG00000002291	0.117806	0.847337	0.139031	1.96539e-33	0.123189	0.943208	0.130606	1.21635e-35	0.127305	1.07522	0.118399	4.36601e-40	4	129621256	129625400	129623328	927
ENSACAG00000002293	0.0572367	0.528295	0.108342	6.06694e-19	0.0608578	0.581185	0.104713	6.12223e-20	0.273501	0.847172	0.32284	2.02538e-09	5	119764578	119784692	119774635	588
ENSACAG00000002294	0.128543	0.675456	0.190306	5.13847e-17	0.147569	0.749305	0.196941	1.23536e-17	0.137455	0.724139	0.189819	1.27134e-17	2	54601128	54625589	54613400	690
ENSACAG00000002295	0.0168485	0.447955	0.037612	5.60583e-26	0.0191238	0.559006	0.0342105	6.40543e-31	0.0237301	0.540528	0.0439017	1.52793e-28	Un0114	84722	117006	100864	591
ENSACAG00000002297	0.0118383	1.2285	0.00963641	6.80576e-10	0.0239253	0.469304	0.0509802	9.82101e-05	0.0118383	0.834593	0.0141845	5.7697e-08	6	7569576	7608075	7588830	105
ENSACAG00000002300	0.105361	0.962892	0.109421	8.03879e-73	0.114986	1.03562	0.111031	1.51027e-74	0.157258	0.754092	0.208539	2.27832e-40	Un0530	29385	37197	33291	1701
ENSACAG00000002303	0.0580674	0.546958	0.106164	6.0924e-08	0.0781794	0.648658	0.120525	3.82036e-08	0.0647159	0.550512	0.117556	1.36219e-07	6	59718503	59735356	59726900	210
ENSACAG00000002306	0.156857	1.17884	0.13306	1.03466e-44	0.247044	1.22439	0.201768	3.15957e-31	0.162084	1.39403	0.11627	1.37577e-49	Un0103	361790	370209	366000	1050
ENSACAG00000002307	0.104911	0.649885	0.16143	5.03487e-11	0.12394	0.718607	0.172472	1.27782e-10	0.124083	0.888906	0.139591	9.16356e-14	4	53948352	53953576	53950964	324
ENSACAG00000002308	0.0492095	0.562064	0.0875514	9.29869e-09	0.170034	0.93941	0.181001	2.35919e-07	0.0712033	0.519282	0.137119	3.28846e-07	Un0103	346649	354289	350469	216
ENSACAG00000002309	0.0196471	0.496842	0.039544	2.94204e-110	0.0194703	0.519949	0.0374466	4.86378e-115	0.0219304	0.56337	0.0389272	2.60388e-121	4	129657037	129702113	129679575	2481
ENSACAG00000002311	NA	0.777791	0	NA	NA	1.07275	0	NA	0.849548	1.3197	0.643742	0.444846	Un0241	490354	621363	555858	84
ENSACAG00000002312	0.0294429	0.789192	0.0373076	5.84417e-50	0.0294968	0.858139	0.034373	1.44774e-53	0.06334	0.717111	0.0883267	5.06055e-36	4	112133074	112147941	112141000	816
ENSACAG00000002321	0.0187673	0.523305	0.0358631	8.53587e-55	0.0198475	0.597738	0.0332044	4.75318e-61	0.0225778	0.722152	0.0312647	4.60501e-69	3	187457139	187501386	187479000	1203
ENSACAG00000002322	0.0325084	0.777721	0.0417995	7.34634e-17	0.0589424	0.914991	0.0644186	1.59339e-16	0.0372763	0.776879	0.0479821	3.12285e-16	4	120445976	120447953	120447000	282
ENSACAG00000002327	0.183491	0.947974	0.193561	2.73907e-31	0.202306	1.0561	0.19156	2.14414e-32	0.206349	1.1061	0.186556	9.74765e-34	Un0065	1823239	1842296	1832770	1059
ENSACAG00000002329	0.0640754	0.800841	0.0800102	3.55828e-43	0.0692069	0.873258	0.0792513	1.0792e-45	0.137668	0.932549	0.147625	1.77239e-32	3	29779811	29807787	29793799	942
ENSACAG00000002330	0.0276908	0.777864	0.0355985	9.38653e-39	0.026571	0.761172	0.034908	1.63171e-37	0.02969	0.881715	0.033673	8.6769e-42	1	179957028	179965755	179961000	636
ENSACAG00000002332	0.0653413	0.662012	0.0987011	9.9495e-12	0.0955536	0.782904	0.12205	3.14925e-11	0.0828244	1.01955	0.0812358	1.18194e-14	4	53966480	53977804	53972142	276
ENSACAG00000002334	0.0732129	0.734342	0.0996986	1.52841e-27	0.203858	0.910371	0.223928	3.67307e-17	0.0798037	0.779043	0.102438	4.54287e-28	Un0103	327793	339290	333542	672
ENSACAG00000002337	0.137564	0.497148	0.276707	3.59482e-09	0.212397	0.658577	0.322509	3.69911e-09	0.0543397	0.381015	0.142619	1.34482e-13	6	3990599	4018119	4004359	597
ENSACAG00000002338	0.0259301	0.612036	0.0423669	2.51125e-07	0.0259939	0.384816	0.0675489	5.68997e-05	0.54656	NA	NA	0.000457228	Un0018	3187649	3198984	3193320	144
ENSACAG00000002339	0.0313723	0.473699	0.0662285	3.67888e-20	0.0313587	0.474669	0.0660643	3.42766e-20	0.0262637	0.442526	0.0593496	5.80953e-20	1	244472757	244495896	244484000	525
ENSACAG00000002342	0.0898224	0.795624	0.112895	3.15529e-24	0.0793948	0.758199	0.104715	3.23767e-24	0.0735451	0.909373	0.0808745	1.81724e-30	Un0011	3206840	3226528	3216684	612
ENSACAG00000002344	0.0508492	0.652902	0.0778817	2.64397e-33	0.0507556	0.756129	0.0671255	2.72722e-38	0.123577	0.795494	0.155346	2.69126e-25	1	219081774	219111545	219097000	741
ENSACAG00000002345	0.259242	0.779422	0.332608	2.10281e-12	0.286535	0.798668	0.358766	2.1041e-11	0.2876	0.901953	0.318863	7.28468e-14	5	112985263	113002685	112993974	915
ENSACAG00000002346	0.150695	1.07317	0.140421	2.47776e-13	0.138682	1.13515	0.122171	2.36232e-15	0.185359	1.18589	0.156304	6.8975e-13	Un0504	30400	100207	65303.5	318
ENSACAG00000002347	0.0495747	1.03144	0.0480637	3.424e-113	0.0530973	0.943088	0.0563016	1.30641e-103	0.0667185	0.832134	0.0801776	1.06557e-84	5	63908448	63935357	63921900	1788
ENSACAG00000002348	0.0907867	0.549179	0.165314	3.1231e-25	0.0997636	0.587004	0.169954	5.13014e-25	1.21008	NA	NA	7.67704e-06	1	88475055	88503520	88489300	1005
ENSACAG00000002349	0.0439076	0.707219	0.0620848	0.0239385	0.672245	1.94627	0.345402	0.382313	0.0432525	0.421102	0.102713	0.0967529	4	66849703	66877580	66863600	30
ENSACAG00000002350	0.220013	0.974933	0.22567	8.16882e-06	0.223948	0.882175	0.253859	4.11778e-05	0.232889	0.764379	0.304677	0.000426752	4	120430887	120433356	120432000	186
ENSACAG00000002351	0.0271633	0.750037	0.036216	3.08644e-51	0.0318264	0.801161	0.0397254	4.6408e-52	0.0364525	0.883066	0.0412795	3.43082e-54	Un0618	154802	169444	162123	873
ENSACAG00000002354	0.0343713	1.03857	0.033095	1.76519e-74	0.0333321	0.910055	0.0366265	2.3718e-68	0.0376149	1.04282	0.0360703	3.87181e-72	Un0102	169085	170162	169624	1074
ENSACAG00000002358	0.0737896	0.466896	0.158043	2.40678e-17	0.158447	0.542629	0.291998	9.92581e-11	0.0813531	0.390029	0.208582	1.20699e-12	Un0102	2249	38337	20293	735
ENSACAG00000002359	0.0952884	0.910247	0.104684	1.40558e-15	0.139436	0.894046	0.15596	4.67953e-12	0.133516	1.12766	0.118401	4.38107e-16	4	120403899	120411555	120407727	336
ENSACAG00000002362	0.180305	0.546175	0.330123	4.37916e-15	0.206263	0.668331	0.308625	2.70074e-18	0.232834	0.710289	0.327802	2.99646e-17	4	53998634	54024678	54011656	1242
ENSACAG00000002368	0.0875372	0.682878	0.128189	9.46117e-12	0.0845262	0.505155	0.167327	5.84349e-09	0.0748148	0.552124	0.135503	1.17216e-10	6	35343655	35372586	35358100	297
ENSACAG00000002370	0.00418058	0.312474	0.0133789	1.66697e-33	0.00558123	0.421887	0.0132292	9.83016e-43	0.0041788	0.458166	0.0091207	4.34912e-47	Un0018	2802468	3070657	2936560	927
ENSACAG00000002372	0.196195	0.628192	0.312317	7.39903e-33	0.220328	0.577731	0.381369	2.62172e-23	0.223475	0.690367	0.323704	2.35465e-32	5	53584196	53608628	53596412	2508
ENSACAG00000002373	0.0532701	0.575162	0.0926176	1.17085e-13	0.0870354	0.678653	0.128247	3.25369e-12	0.0401649	0.573351	0.0700528	3.38467e-15	5	63808662	63825823	63817200	324
ENSACAG00000002375	0.107675	0.680748	0.158171	6.07898e-22	0.108144	0.68931	0.156887	2.18229e-22	0.117725	0.714519	0.164762	2.21148e-22	Un0065	1768801	1774838	1771820	714
ENSACAG00000002376	0.156835	0.885419	0.177131	2.46344e-117	0.168607	0.912109	0.184854	3.02087e-114	0.187673	0.949657	0.197622	3.94272e-108	3	107599073	107627661	107613367	4407
ENSACAG00000002377	0.0244772	0.883841	0.0276941	7.78579e-40	0.017007	1.19131	0.0142759	2.32199e-51	0.0170195	1.43697	0.011844	1.05691e-56	Un0114	151108	161539	156324	552
ENSACAG00000002379	0.0322245	0.839024	0.0384071	8.10683e-40	0.0311768	0.84755	0.0367847	9.35734e-40	0.034385	0.855709	0.0401831	8.33886e-40	1	219046468	219076406	219061437	633
ENSACAG00000002380	0.0141344	1.28846	0.01097	1.29607e-52	0.0141601	1.11069	0.0127489	1.46249e-48	0.0165163	1.69857	0.00972362	1.78395e-58	Un0103	273019	279488	276254	552
ENSACAG00000002381	0.0219852	0.825331	0.026638	2.76804e-55	0.0502051	0.912966	0.0549912	1.87526e-48	0.0356503	0.88424	0.0403174	1.0834e-52	Un0065	1723172	1747649	1735410	834
ENSACAG00000002384	0.0412092	0.483132	0.085296	4.57894e-36	0.0461607	0.584965	0.0789119	3.10229e-42	0.112222	0.613097	0.183041	1.02903e-26	1	244514748	244524229	244519000	1095
ENSACAG00000002385	0.0319054	0.255524	0.124862	3.56672e-09	0.0346157	0.350504	0.0987597	8.12098e-13	0.0408527	0.329947	0.123816	2.54397e-11	2	54729957	54730777	54730367	495
ENSACAG00000002387	0.139426	0.972788	0.143326	8.19576e-17	0.154442	0.973596	0.158631	1.20415e-15	0.149648	1.03066	0.145197	1.49388e-17	Un0254	8520	12429	10474.5	426
ENSACAG00000002388	0.0278056	1.49699	0.0185743	1.22413e-92	0.0284208	1.89469	0.0150002	3.18763e-102	0.0284208	1.65837	0.0171378	3.36518e-97	Un0504	190924	196186	193555	1002
ENSACAG00000002389	0.063481	0.858903	0.0739094	3.80595e-26	0.0815176	0.963917	0.0845691	5.84596e-26	0.0844404	0.829049	0.101852	3.26768e-22	5	113066651	113072586	113070000	486
ENSACAG00000002392	0.0556469	1.33749	0.0416054	4.23207e-66	0.0509876	1.53148	0.033293	5.95077e-73	0.0502803	1.45926	0.0344559	8.41208e-71	Un0504	210676	265559	238118	903
ENSACAG00000002393	0.0474046	0.537715	0.0881592	6.71139e-21	0.0518892	0.651783	0.0796111	2.23481e-24	0.0426956	0.6882	0.0620395	9.68352e-28	1	219004517	219015771	219010144	588
ENSACAG00000002394	0.0748501	0.889783	0.0841218	1.71222e-31	0.0864352	0.942276	0.0917302	1.42934e-30	0.0772514	1.0414	0.0741803	3.32543e-34	3	146053768	146055592	146054680	597
ENSACAG00000002395	0.178319	0.957549	0.186225	1.32528e-16	0.217412	1.28102	0.169717	1.07307e-18	0.212585	1.73383	0.12261	1.34432e-23	Un0231	701137	750549	725843	519
ENSACAG00000002398	0.0796871	0.652232	0.122176	1.06319e-18	0.290948	0.884564	0.328917	1.0163e-08	0.134112	0.614482	0.218253	6.26921e-12	1	96416769	96441115	96428942	534
ENSACAG00000002401	0.0271324	0.708882	0.0382749	2.63928e-54	0.0314074	0.845713	0.0371372	2.33252e-60	0.0321998	0.790965	0.0407094	1.18985e-57	2	50409356	50430694	50420025	942
ENSACAG00000002402	0.0646002	0.346481	0.186446	1.5353e-45	0.0690567	0.375062	0.184121	5.37942e-49	0.07468	0.404252	0.184736	4.27607e-51	5	53631038	53726913	53679000	2721
ENSACAG00000002404	0.00567809	0.845944	0.00671213	4.03633e-38	0.00851453	1.05636	0.00806026	2.01658e-42	0.0113867	1.16988	0.00973324	7.48195e-44	Un0289	124134	134800	129467	462
ENSACAG00000002405	0.0377513	0.797644	0.0473285	8.85682e-50	0.0572569	0.80992	0.0706944	1.70829e-43	0.0813972	0.821989	0.0990247	2.79725e-37	1	223148804	223167723	223158000	864
ENSACAG00000002406	0.0675995	0.761655	0.0887534	3.22355e-31	0.0746997	0.953929	0.0783074	5.56179e-36	0.0735657	0.907721	0.0810444	3.4663e-35	6	69990066	69990795	69990400	696
ENSACAG00000002408	0.110821	1.18141	0.0938036	3.53132e-17	0.0995204	1.15875	0.0858861	2.92066e-17	0.122135	1.15045	0.106163	1.99057e-15	Un3163	3589	5193	4391	327
ENSACAG00000002409	0.00838739	0.509048	0.0164766	3.61891e-36	0.0102626	0.550673	0.0186365	1.43641e-37	0.0121525	0.548561	0.0221534	1.58704e-36	2	54769298	54791019	54780200	687
ENSACAG00000002411	0.109643	0.942852	0.116289	2.14651e-46	0.127767	0.98655	0.129509	2.55073e-43	0.112258	1.11331	0.100833	2.95845e-53	2	50477094	50486170	50481632	1116
ENSACAG00000002414	0.134639	1.26272	0.106627	1.22208e-166	0.142767	1.29727	0.110052	1.04078e-163	0.154707	1.2362	0.125147	1.00664e-148	Un0182	70769	88723	79746	3597
ENSACAG00000002415	0.033242	0.372212	0.0893091	8.5221e-28	0.0406216	0.485454	0.0836775	2.42547e-34	0.0977769	0.436574	0.223964	4.50022e-17	2	30037136	30104104	30070620	963
ENSACAG00000002419	0.0980016	1.05889	0.092551	2.44681e-25	0.0977036	0.993364	0.0983563	1.46301e-23	0.19222	1.46873	0.130876	5.49701e-22	Un0231	755330	793294	774312	453
ENSACAG00000002420	0.00853276	1.03021	0.00828251	1.74184e-26	0.188108	0.987162	0.190555	2.36921e-09	0.00853276	0.971151	0.00878623	1.02175e-27	3	200403093	200415931	200409512	300
ENSACAG00000002422	0.0690456	1.51036	0.0457148	9.54161e-17	0.0790984	1.74633	0.045294	7.2118e-18	0.0834472	1.44439	0.0577734	4.76116e-15	4	111916074	111932253	111924000	216
ENSACAG00000002423	0.00533247	0.718538	0.00742128	1.82379e-52	0.0650628	NA	NA	3.69654e-78	0.005321	0.952005	0.00558925	2.25672e-63	2	50844312	50902259	50873300	729
ENSACAG00000002424	0.0155208	0.795589	0.0195085	6.53311e-70	0.0167997	0.86999	0.0193102	7.03791e-74	0.0173924	0.89013	0.0195392	1.70591e-73	4	111860470	111888342	111874406	1035
ENSACAG00000002426	0.0843738	0.734127	0.114931	4.23317e-48	0.0788272	0.694001	0.113584	3.05353e-47	0.0821479	0.720799	0.113968	5.65098e-48	3	107711969	107735882	107724000	1263
ENSACAG00000002427	0.0755065	0.655565	0.115178	9.94363e-33	0.0822685	0.690251	0.119186	2.12734e-33	0.158593	0.783499	0.202417	1.47478e-23	2	117832962	117841935	117837000	939
ENSACAG00000002428	0.00417395	0.828421	0.00503844	6.28696e-31	0.00417395	0.904191	0.00461623	1.29442e-32	0.010443	0.825122	0.0126564	4.55919e-27	1	44170648	44172309	44171500	324
ENSACAG00000002433	0.00339111	0.368439	0.009204	1.43522e-16	0.00338714	0.500928	0.00676173	2.51275e-21	0.00338318	0.528289	0.00640404	3.31183e-22	Un0011	3228925	3235741	3232333	378
ENSACAG00000002435	0.292039	1.07694	0.271175	4.67413e-06	0.286706	1.6982	0.16883	2.66801e-09	0.290508	1.36459	0.21289	1.60412e-07	Un0247	283563	336956	310260	270
ENSACAG00000002436	0.105449	1.64557	0.0640807	3.96842e-20	0.131041	3.50598	0.0373766	1.87054e-22	0.119066	1.33942	0.0888931	1.81402e-16	Un0138	454566	455082	454824	294
ENSACAG00000002437	0.122515	0.974907	0.125668	1.49029e-51	0.129263	1.18162	0.109394	2.12972e-60	0.142211	1.45917	0.0974602	5.78985e-67	Un0103	226742	228366	227554	1311
ENSACAG00000002438	0.0658675	0.744153	0.0885134	3.26323e-30	0.148457	0.792109	0.18742	2.84666e-19	0.0604276	0.772086	0.0782654	5.89672e-33	4	78570324	78647353	78608800	687
ENSACAG00000002439	0.022222	0.960237	0.0231422	4.58782e-47	0.034508	0.953884	0.0361763	5.63911e-43	0.0344765	0.934258	0.0369026	3.0374e-42	1	60981749	60989662	60985700	681
ENSACAG00000002440	0.138913	0.718369	0.193373	5.44227e-15	0.152068	0.691901	0.219783	2.81379e-13	0.149882	0.81489	0.183929	3.02599e-16	1	44131636	44140902	44136269	543
ENSACAG00000002443	0.00660575	1.29274	0.00510988	4.00713e-56	0.00660575	1.65581	0.00398943	1.96173e-62	0.00660523	1.34344	0.00491666	3.63054e-57	Un0289	188613	194010	191312	573
ENSACAG00000002445	0.0445985	0.52203	0.085433	1.34295e-26	0.0551846	0.750787	0.0735024	4.04706e-35	0.0560163	0.613441	0.0913149	5.97337e-29	Un0103	198857	215729	207293	768
ENSACAG00000002446	0.0295573	0.594254	0.0497384	4.59292e-09	0.0371803	0.711768	0.0522365	6.29411e-10	0.0295573	0.539641	0.0547721	2.43113e-08	Un0881	4081	4258	4169.5	177
ENSACAG00000002447	0.0130185	2.37765	0.00547536	8.68491e-45	0.00742444	1.70136	0.00436384	1.21444e-41	0.0111611	1.15361	0.00967489	1.01989e-33	Un0347	1604	7874	4739	354
ENSACAG00000002448	0.0790718	0.900377	0.0878207	4.8711e-35	0.0827795	1.10645	0.0748153	7.7004e-41	0.0891168	1.17959	0.0755491	8.00366e-41	Un1488	307	6000	3153.5	777
ENSACAG00000002449	0.137528	0.670111	0.205232	9.27571e-24	0.153974	0.754026	0.204202	6.23616e-25	0.138754	0.804898	0.172387	1.37332e-29	6	35329104	35332516	35330810	1041
ENSACAG00000002451	0.157484	1.00786	0.156256	2.10729e-34	0.190832	1.19519	0.159667	4.91328e-35	0.162395	1.10307	0.147221	6.43953e-37	Un1102	73198	85629	79413.5	993
ENSACAG00000002453	0.0123926	0.52066	0.0238018	4.60547e-12	0.0312488	0.328447	0.095141	2.58807e-06	0.0249004	0.358115	0.0695319	2.07044e-07	1	96261091	96313370	96287200	216
ENSACAG00000002454	0.221707	0.957065	0.231653	4.37463e-05	0.22421	0.802761	0.279299	0.00018578	0.204169	0.787836	0.259151	0.000150365	1	244532501	244541374	244537000	165
ENSACAG00000002456	0.156366	1.44289	0.10837	3.62719e-16	0.168329	1.70783	0.0985633	1.42976e-17	1.58162	3.17631	0.497945	0.214946	5	82891860	82902969	82897400	321
ENSACAG00000002459	0.0927214	0.803434	0.115406	5.413e-125	0.095085	0.866076	0.109788	6.47401e-134	0.101059	0.965895	0.104627	5.5651e-144	1	244612855	244646083	244629469	3405
ENSACAG00000002460	0.119144	0.832725	0.143077	1.97034e-28	0.128796	0.898363	0.143367	4.73902e-29	0.127102	1.0625	0.119626	4.17828e-34	Un0011	3319633	3363377	3341505	816
ENSACAG00000002461	0.0162002	0.679	0.0238589	7.24086e-68	0.0232617	0.658514	0.0353246	2.40598e-61	0.111004	0.780855	0.142157	1.78828e-37	Un0173	642526	653507	648016	1131
ENSACAG00000002463	0.075509	1.04548	0.0722241	2.74507e-67	0.105529	1.14477	0.0921832	1.77189e-61	0.090533	1.41958	0.0637745	5.62031e-77	Un0173	672143	693900	683022	1221
ENSACAG00000002464	0.28674	0.690668	0.415164	0.00794582	0.222399	1.28445	0.173147	1.28321e-07	0.207297	1.18067	0.175576	1.04402e-07	Un0387	83014	85795	84404.5	186
ENSACAG00000002465	0.0227795	0.755486	0.0301521	3.03529e-24	0.0394896	0.788196	0.0501012	8.69981e-22	0.0377669	0.81031	0.0466079	2.93906e-23	1	247232488	247238101	247235000	396
ENSACAG00000002469	0.10027	0.734283	0.136555	3.5623e-15	0.112778	1.10094	0.102438	2.53209e-20	0.129387	1.10394	0.117206	2.17945e-19	3	28735805	28744507	28740156	420
ENSACAG00000002470	0.208032	0.935387	0.222402	4.02736e-07	0.182245	0.730647	0.24943	5.74086e-06	0.188595	1.56169	0.120763	3.15499e-12	5	82934015	82939677	82936846	261
ENSACAG00000002472	0.0604296	0.516607	0.116974	7.65409e-10	0.0708236	0.786386	0.0900621	6.48315e-14	0.0869675	0.673874	0.129056	8.3506e-11	2	184563908	184707193	184636000	279
ENSACAG00000002476	0.0910422	0.695462	0.130909	1.10599e-70	0.110941	0.720327	0.154015	4.02666e-64	0.110708	0.738434	0.149922	8.49289e-67	6	36766602	36851569	36809100	2211
ENSACAG00000002477	0.218642	0.842707	0.259452	6.81507e-31	0.23208	0.854579	0.271572	3.62045e-29	0.243253	0.826893	0.294177	5.22122e-26	1	218935972	218956504	218946238	1587
ENSACAG00000002478	0.107854	0.606991	0.177686	3.16878e-19	0.114944	0.597892	0.19225	1.14887e-17	0.115332	0.561172	0.20552	4.44848e-16	3	108284001	108318334	108301000	768
ENSACAG00000002480	0.0148859	0.676022	0.0220199	3.27134e-27	0.0270523	0.748209	0.0361561	2.67619e-26	0.0269783	0.950539	0.0283821	1.8438e-31	1	61119051	61162080	61140600	438
ENSACAG00000002482	0.0270199	0.786451	0.0343567	5.25074e-45	0.0339748	0.952991	0.0356507	2.65806e-50	0.0389207	1.10521	0.0352156	4.20693e-53	2	184508433	184553413	184530923	702
ENSACAG00000002483	0.206057	0.913305	0.225617	2.40675e-51	0.219667	1.01732	0.215928	1.80235e-55	0.245306	1.01968	0.240571	5.98475e-49	1	244701049	244703690	244702000	2286
ENSACAG00000002486	0.0138246	0.754984	0.0183111	2.76216e-82	0.0208611	0.911072	0.0228973	2.02436e-87	0.0210359	0.82814	0.0254013	1.55987e-81	1	96169600	96248843	96209200	1218
ENSACAG00000002487	0.0586442	0.61946	0.0946698	3.63193e-22	0.0610632	0.523774	0.116583	4.82857e-19	0.0598895	0.544765	0.109936	1.35467e-19	1	244767375	244773161	244770268	576
ENSACAG00000002489	0.00970616	0.866362	0.0112034	3.43868e-10	0.160903	0.389923	0.412653	0.069186	0.0394636	0.889859	0.0443481	3.37797e-08	4	10742513	10749788	10746200	129
ENSACAG00000002490	0.0531368	0.691867	0.0768021	1.01582e-26	0.0601677	0.664802	0.0905046	2.63211e-23	0.0750576	0.653256	0.114898	9.13689e-21	1	44015192	44030760	44022976	594
ENSACAG00000002493	0.00199208	0.661836	0.00300994	2.46248e-96	0.00448426	0.776271	0.00577666	4.64774e-105	0.155473	NA	NA	3.01156e-110	6	7630416	7762436	7696426	1326
ENSACAG00000002494	0.00132931	0.517396	0.00256923	2.53231e-58	0.00400356	0.549918	0.00728028	6.1424e-58	0.00132846	0.528086	0.00251562	3.18513e-59	2	117850482	117867085	117859000	975
ENSACAG00000002495	0.0168981	1.07853	0.0156678	1.22729e-18	0.0226391	1.06928	0.0211722	9.60276e-18	0.0284526	1.25789	0.0226193	9.41977e-19	Un0530	113642	120419	117030	225
ENSACAG00000002496	0.0353049	0.201106	0.175554	0.00814335	0.249447	2.10289	0.118621	0.000249884	0.0536007	0.373185	0.14363	0.0126227	6	35268480	35325915	35297200	75
ENSACAG00000002500	0.0429914	1.07756	0.0398972	1.69237e-27	0.0681471	1.24996	0.0545196	4.30594e-26	0.0591278	0.958824	0.061667	3.81209e-22	3	84791231	84808236	84799700	384
ENSACAG00000002501	0.00542582	0.672845	0.00806399	3.69204e-94	0.00180268	0.789344	0.00228377	1.04406e-111	0.00451259	0.791902	0.00569842	2.90684e-107	Un0331	123788	156356	140072	1416
ENSACAG00000002503	0.0870867	NA	NA	NA	0.0870867	0.125156	0.695828	0.746835	0.913355	0.77272	1.182	0.703194	6	69633184	69652289	69642700	33
ENSACAG00000002505	0.201297	0.919964	0.21881	1.57133e-23	0.226937	0.949164	0.239091	1.57663e-21	0.227446	0.776753	0.292817	3.17477e-16	Un0725	101075	102512	101794	891
ENSACAG00000002507	0.0977848	NA	NA	6.32604e-25	0.229602	0.763232	0.300828	4.97822e-05	0.243695	1.14392	0.213035	1.99297e-07	Un0725	131830	133021	132426	249
ENSACAG00000002508	0.0268659	2.44793	0.010975	3.53329e-44	0.0178249	NA	NA	2.52735e-50	0.0268948	NA	NA	7.87953e-53	Un0247	343915	360576	352246	375
ENSACAG00000002511	0.13858	0.955894	0.144974	1.09599e-15	0.140773	1.38291	0.101795	1.20789e-20	0.146462	1.4531	0.100793	2.60886e-21	Un2703	1690	12879	7284.5	390
ENSACAG00000002518	0.110102	0.792282	0.138968	2.04867e-17	0.10708	0.878045	0.121953	1.07218e-19	0.120493	0.781545	0.154172	1.4341e-16	3	187538195	187546940	187543000	501
ENSACAG00000002519	0.0287845	0.965016	0.029828	1.04033e-54	0.0270983	1.01947	0.0265808	9.10284e-58	0.0288164	1.22459	0.0235314	4.16294e-64	4	129722139	129731363	129726751	777
ENSACAG00000002526	0.0183595	0.406957	0.0451143	1.26399e-36	0.022489	0.479427	0.0469081	8.63479e-41	0.0238601	0.56006	0.0426027	1.42517e-46	3	187560941	187637136	187599000	972
ENSACAG00000002527	0.136286	0.89606	0.152095	1.41989e-38	0.154213	0.973604	0.158394	7.13876e-39	0.154003	0.930872	0.16544	7.08938e-37	4	10672725	10738992	10705900	1176
ENSACAG00000002529	0.10175	NA	NA	2.18757e-05	0.130229	0.802529	0.162274	0.0101253	0.282561	NA	NA	2.60301e-05	Un0148	959093	1231333	1095213	54
ENSACAG00000002530	0.0157399	0.48504	0.0324508	2.56726e-11	0.0157685	0.647258	0.024362	2.04716e-14	0.0211032	0.601285	0.0350968	7.36336e-13	1	247913424	247913715	247914000	243
ENSACAG00000002531	0.12388	0.990682	0.125046	8.05109e-16	0.136619	1.48919	0.0917406	7.53981e-21	0.136619	1.48919	0.0917406	7.53981e-21	1	223171836	223182640	223177238	390
ENSACAG00000002532	0.0862628	0.673669	0.128049	1.31033e-23	0.0734816	0.819652	0.0896497	4.31947e-32	0.121483	0.870273	0.139592	9.84408e-26	3	84762307	84789619	84775963	732
ENSACAG00000002536	0.112461	0.881164	0.127628	1.48294e-07	0.671299	2.38113	0.281925	0.00923644	0.130329	1.66544	0.0782551	1.46841e-10	Un1444	35475	52718	44096.5	156
ENSACAG00000002538	0.0708189	NA	NA	2.14154e-05	0.749336	NA	NA	0.0872964	0.0934684	NA	NA	3.11149e-05	Un1001	27377	41811	34594	30
ENSACAG00000002543	0.14552	0.552322	0.26347	8.46192e-08	0.161143	0.438422	0.367552	0.000138043	0.170779	0.533275	0.320246	4.25097e-06	3	145662080	145666034	145664057	387
ENSACAG00000002544	0.0339965	1.08586	0.0313082	1.11588e-78	0.0380116	0.9492	0.0400459	2.7148e-69	0.054489	0.997114	0.0546467	2.32848e-64	Un0289	231799	243151	237475	1035
ENSACAG00000002545	0.0572933	1.18463	0.0483638	6.05756e-40	0.0720789	1.17682	0.0612489	1.3804e-36	0.22355	1.36349	0.163955	2.02735e-20	Un3274	2763	10246	6504.5	576
ENSACAG00000002547	0.125764	1.41108	0.0891261	4.19771e-18	0.127277	1.71318	0.0742932	1.60679e-20	0.125575	1.648	0.0761988	8.17831e-20	Un1039	24318	34851	29584.5	324
ENSACAG00000002548	0.138285	5.16556	0.0267706	2.1761e-47	0.139865	NA	NA	6.42917e-51	0.136085	2.19939	0.0618742	7.4534e-43	Un2230	5771	7020	6395.5	609
ENSACAG00000002549	NA	NA	NA	NA	NA	2.47879	0	NA	NA	5.16643	0	NA	Un1102	92074	96934	94504	138
ENSACAG00000002551	NA	0.270483	0	NA	NA	0.402626	0	NA	NA	0.318516	0	NA	2	130932792	130945163	130939000	288
ENSACAG00000002553	0.0645319	1.09716	0.0588174	4.92046e-31	0.0769772	0.917687	0.0838818	1.8282e-25	0.0769065	1.13928	0.0675046	3.16362e-30	Un0231	816012	828801	822406	504
ENSACAG00000002554	0.218563	0.710206	0.307746	8.36586e-09	0.239105	0.656229	0.364362	8.01419e-07	0.269758	0.627644	0.429794	1.51007e-05	3	28299367	28300288	28299800	537
ENSACAG00000002555	0.0287445	0.872988	0.0329265	9.7126e-38	0.0433975	0.841507	0.0515712	8.81449e-33	0.0384551	0.896004	0.0429184	1.02291e-35	3	200391839	200399954	200396000	561
ENSACAG00000002556	0.0380969	1.3797	0.0276124	5.02596e-19	0.0384544	2.23371	0.0172155	5.19487e-23	0.03475	1.37737	0.0252292	1.10637e-18	Un0090	823690	836227	829958	198
ENSACAG00000002557	0.124684	0.61295	0.203416	8.36404e-12	0.117461	0.690211	0.170181	9.12124e-15	0.120524	0.661566	0.18218	8.29218e-14	2	130899451	130922659	130911055	519
ENSACAG00000002558	0.0737062	0.755094	0.0976119	2.56676e-41	0.116911	0.908425	0.128697	1.18369e-38	0.137116	0.922074	0.148703	6.13623e-35	4	10590334	10597868	10594101	978
ENSACAG00000002561	0.156389	2.01596	0.0775754	6.24957e-27	0.150464	1.81684	0.0828162	1.77356e-26	0.169747	2.70828	0.062677	2.82002e-28	3	200358320	200388283	200373000	477
ENSACAG00000002563	0.178606	1.07864	0.165585	2.74995e-06	0.16844	0.856809	0.19659	1.34526e-05	0.178696	0.785568	0.227474	4.87951e-05	Un0530	227489	232981	230235	153
ENSACAG00000002564	NA	0.376678	0	NA	NA	0.482168	0	NA	0.0249167	0.460273	0.0541347	1.36602e-38	1	80435349	80464445	80449897	1011
ENSACAG00000002565	0.0797751	0.617906	0.129105	3.8547e-44	0.0838047	0.702162	0.119352	1.902e-50	0.0833438	0.630519	0.132183	2.72355e-44	2	117894162	117900504	117897333	1368
ENSACAG00000002567	0.0513365	1.00168	0.0512506	9.20322e-22	0.0513004	0.867044	0.059167	1.84079e-19	0.0685839	0.403884	0.169811	6.45568e-08	1	148975146	148976938	148976042	327
ENSACAG00000002568	0.0218923	0.794029	0.0275712	1.63192e-20	0.0121336	0.738751	0.0164244	1.95697e-21	0.0170247	0.636777	0.0267357	3.37748e-18	Un0103	1375951	1411734	1393840	279
ENSACAG00000002571	0.0969671	0.759812	0.12762	1.24053e-27	0.118374	0.950843	0.124494	7.09415e-31	0.0943995	0.824516	0.114491	3.05355e-30	Un1039	37683	57470	47576.5	771
ENSACAG00000002573	0.305006	1.09985	0.277315	0.000228107	0.26096	1.42694	0.18288	4.506e-06	0.277825	0.921197	0.301591	0.000707566	Un0247	777549	786509	782029	147
ENSACAG00000002574	0.0203729	0.738498	0.0275869	1.20688e-44	0.0274748	0.778902	0.0352737	2.66575e-43	0.0145507	0.771633	0.018857	8.39044e-49	1	61258499	61279801	61269150	717
ENSACAG00000002575	0.077668	0.963197	0.0806356	2.39283e-06	0.0958297	1.46786	0.0652853	2.54631e-08	0.0956383	0.869905	0.109941	6.24012e-06	2	54795288	54802176	54798732	117
ENSACAG00000002576	0.013143	0.861893	0.015249	3.85264e-55	0.0128958	0.881612	0.0146275	6.11661e-57	0.0175432	0.894672	0.0196085	7.10488e-56	1	223185492	223192488	223188990	723
ENSACAG00000002577	0.0130034	1.13688	0.0114379	8.2123e-26	0.0103847	1.17328	0.00885097	8.2123e-26	0.00518009	1.24118	0.00417354	6.88799e-28	Un0247	794744	805132	799938	258
ENSACAG00000002578	0.0860169	0.736574	0.11678	6.97839e-10	0.0859775	0.788369	0.109058	1.52198e-10	0.0859972	1.10347	0.0779337	5.06186e-14	Un0065	1708843	1713601	1711222	240
ENSACAG00000002582	0.0577684	0.66288	0.0871475	4.75402e-38	0.0621585	0.747861	0.0831151	1.46188e-41	0.138312	0.740082	0.186887	6.99499e-25	Un0892	48927	63997	56462	951
ENSACAG00000002584	0.0311819	0.604643	0.0515708	4.61463e-27	0.0388688	0.789414	0.0492376	3.24533e-31	0.0403301	0.804118	0.0501545	9.03193e-31	5	54037925	54179359	54108642	594
ENSACAG00000002588	0.0543992	1.05975	0.0513323	1.89645e-31	0.0569849	1.53478	0.0371291	1.5325e-38	0.0570186	1.33584	0.0426836	9.28298e-36	2	55055543	55094439	55074991	480
ENSACAG00000002589	0.0423826	0.717631	0.059059	8.57852e-22	0.0513623	0.687377	0.0747221	1.38056e-20	0.050337	0.838358	0.0600424	2.84156e-24	1	88393445	88412336	88402900	435
ENSACAG00000002590	0.111025	0.774268	0.143394	6.02859e-10	0.134199	0.754817	0.177791	4.24053e-08	0.105091	0.61638	0.170497	4.87828e-08	Un0816	3152	11366	7259	258
ENSACAG00000002592	NA	0.32217	0	NA	0.00514554	0.329597	0.0156116	2.19995e-10	NA	0.404802	0	NA	3	103621157	103631991	103626574	258
ENSACAG00000002595	0.115599	1.69868	0.0680525	3.12947e-10	0.148836	1.65211	0.0900885	2.67571e-09	0.140839	1.17397	0.119968	5.20024e-07	Un1102	97771	101374	99572.5	147
ENSACAG00000002597	0.0257917	0.680822	0.0378832	3.72909e-11	0.0368305	0.638233	0.057707	1.59968e-10	0.0302051	0.9146	0.0330255	1.65894e-14	Un4479	2677	6877	4777	198
ENSACAG00000002598	0.146323	1.09751	0.133322	7.54817e-09	0.14929	0.972962	0.153438	3.52273e-08	0.149138	1.1647	0.128048	1.6641e-09	Un0065	1647595	1653639	1650617	189
ENSACAG00000002600	0.113918	0.602162	0.189182	2.25051e-09	0.113742	0.701087	0.162237	3.3202e-11	0.122958	0.860782	0.142844	8.97547e-14	2	117966640	117991966	117979303	399
ENSACAG00000002602	0.10085	0.775344	0.130071	1.35763e-15	0.199289	0.818397	0.243512	1.39404e-09	0.127101	0.84192	0.150965	2.28552e-14	Un2221	1034	15339	8186.5	387
ENSACAG00000002603	0.106617	0.8743	0.121946	1.00013e-34	0.108242	0.931656	0.116182	1.43457e-36	0.109472	1.03175	0.106103	1.19758e-39	Un0065	1488300	1493236	1490768	846
ENSACAG00000002604	0.0204573	0.191462	0.106848	1.61675e-09	0.0204315	0.210813	0.0969175	1.19053e-10	0.0181336	0.201509	0.0899894	1.3998e-10	3	103539782	103575312	103557547	588
ENSACAG00000002606	0.00523358	0.391646	0.0133631	8.87683e-31	0.0122631	0.438834	0.0279448	3.30683e-30	0.010497	0.439259	0.023897	4.56509e-31	Un0331	201589	313623	257606	726
ENSACAG00000002607	0.0331079	2.00913	0.0164788	9.67609e-47	0.217763	NA	NA	4.01995e-36	0.219494	NA	NA	2.76234e-36	Un0235	594162	625539	609850	456
ENSACAG00000002608	0.0775768	1.20292	0.0644906	7.11343e-27	0.0788715	0.951386	0.0829017	1.00652e-22	0.0769071	1.34456	0.0571985	1.01204e-28	Un0090	742146	758138	750142	438
ENSACAG00000002609	0.0602155	0.815653	0.0738248	8.47433e-22	0.0607769	0.843598	0.0720448	1.48927e-22	0.0643689	0.843598	0.0763028	4.89962e-22	Un0454	135106	135511	135308	402
ENSACAG00000002610	0.135613	0.426019	0.318327	0.000139958	0.140941	0.420083	0.335507	0.000335579	0.125523	0.354972	0.353612	0.00145656	Un0454	84227	102554	93390.5	312
ENSACAG00000002612	0.0900438	0.74206	0.121343	6.01406e-08	0.0983137	0.732448	0.134226	1.61333e-07	0.0909212	0.707376	0.128533	1.1906e-07	2	29781498	29781741	29781600	186
ENSACAG00000002613	0.0214501	0.754822	0.0284174	6.48363e-36	0.0323431	0.914307	0.0353744	1.15204e-38	0.0262822	1.09303	0.0240454	4.67161e-45	Un0065	1418083	1435939	1427011	558
ENSACAG00000002616	0.046958	0.699457	0.0671348	5.32581e-33	0.0482022	0.855706	0.0563303	1.38305e-39	0.040444	0.855008	0.0473025	2.34191e-41	4	54028354	54045922	54037138	657
ENSACAG00000002617	0.0173414	1.03172	0.0168082	2.90349e-12	0.0307084	0.662853	0.0463275	7.66944e-09	0.0262355	0.553929	0.0473625	2.66674e-07	4	130169300	130211392	130190346	147
ENSACAG00000002620	0.0141762	0.412583	0.0343595	2.89218e-50	0.0131666	0.45952	0.0286529	1.0496e-56	0.014191	0.478293	0.02967	4.88663e-58	2	55155094	55208354	55181724	1290
ENSACAG00000002630	0.120437	0.810262	0.148639	1.21613e-31	0.124818	0.859697	0.145189	8.02496e-33	0.13182	0.8719	0.151187	1.9449e-32	3	84712625	84744375	84728500	966
ENSACAG00000002631	0.108443	0.840767	0.128981	2.67291e-23	0.109542	0.905527	0.120971	2.11021e-24	0.106371	0.98053	0.108484	1.41328e-27	Un0029	1886230	1890154	1888192	600
ENSACAG00000002632	0.078223	0.9831	0.0795677	1.03711e-14	0.0726618	0.990506	0.0733583	3.092e-15	0.124931	1.20067	0.104051	5.95529e-14	3	200272936	200347842	200310389	264
ENSACAG00000002635	0.0597358	0.679346	0.0879314	6.68095e-07	0.0543308	1.15067	0.0472168	9.68639e-10	0.0486266	1.09221	0.0445215	2.06203e-10	Un0236	12265	13636	12950.5	126
ENSACAG00000002637	0.0869279	0.819667	0.106053	4.21078e-51	0.131686	0.936482	0.140618	2.16947e-44	0.145052	0.952147	0.152341	2.00176e-42	Un0006	2028158	2052814	2040486	1152
ENSACAG00000002639	0.217008	0.520007	0.417317	0.0466294	0.293118	0.506375	0.578856	0.16722	0.315662	0.577237	0.546849	0.11538	1	61294819	61336299	61315559	162
ENSACAG00000002640	0.0281575	0.680207	0.0413954	2.32188e-39	0.0510683	0.989236	0.051624	4.41606e-45	0.0393723	0.866974	0.0454134	6.34193e-44	Un0103	143284	169399	156342	723
ENSACAG00000002641	0.0410554	0.624702	0.06572	6.25066e-18	0.16399	0.725337	0.226088	1.61282e-09	0.0409448	0.535356	0.0764814	2.30094e-15	1	223195009	223209333	223202171	390
ENSACAG00000002642	0.246507	1.59294	0.15475	2.88144e-10	0.186062	0.993136	0.187348	1.84132e-08	0.194062	1.83056	0.106012	1.87126e-13	Un0236	17685	28806	23245.5	258
ENSACAG00000002645	0.0683509	2.35482	0.029026	2.03743e-15	0.0647789	2.30971	0.0280463	1.43805e-16	0.0567107	1.65834	0.0341973	2.31525e-15	Un1274	21077	23491	22284	174
ENSACAG00000002646	0.0884291	1.17579	0.0752083	1.56307e-45	0.095962	0.975868	0.0983351	2.96457e-37	0.146867	0.896471	0.163828	1.79536e-26	Un0501	238144	258195	248170	819
ENSACAG00000002648	0.00941806	0.364839	0.0258143	3.56572e-11	0.0141807	0.506698	0.0279865	5.58737e-14	1.19809	NA	NA	1.83697e-05	5	119461505	119578716	119520000	276
ENSACAG00000002649	NA	0.37287	0	NA	0.0754464	0.464933	0.162273	8.62652e-13	0.00215845	0.419518	0.00514508	4.35878e-27	3	28206769	28227455	28217112	576
ENSACAG00000002657	0.11043	0.725702	0.15217	1.39758e-12	0.104013	0.658182	0.158031	3.86005e-12	0.117167	0.777811	0.150636	1.34645e-13	Un0146	4014	5952	4983	363
ENSACAG00000002658	0.232016	2.46063	0.0942915	2.41976e-44	0.253908	2.68355	0.0946165	7.02223e-43	0.24496	NA	NA	1.29679e-47	Un3235	380	3489	1934.5	894
ENSACAG00000002662	0.0149007	0.629158	0.0236836	1.13667e-14	0.00494257	0.539207	0.00916637	8.9026e-15	0.00517755	0.585836	0.00883788	6.02187e-15	4	119766564	119766819	119767000	255
ENSACAG00000002664	0.0400188	0.622576	0.0642794	3.64858e-27	0.0329093	1.00362	0.0327906	1.3594e-42	0.0423382	0.795813	0.0532011	3.07566e-33	4	119649939	119656113	119653026	585
ENSACAG00000002668	0.0528441	NA	NA	2.37926e-28	1.13526	1.80307	0.629626	0.166343	0.0864624	1.15157	0.0750821	8.3644e-15	a	2222394	2231450	2226922	252
ENSACAG00000002673	0.0855376	0.967656	0.0883967	4.01483e-12	0.121015	0.912684	0.132592	1.29735e-09	0.418735	1.28475	0.325927	0.000133662	Un0417	348102	351257	349680	216
ENSACAG00000002674	0.071745	1.01237	0.0708683	1.76088e-84	0.128093	1.33416	0.09601	1.89546e-78	0.144837	1.25736	0.115191	1.08494e-68	6	69422392	69439281	69430800	1536
ENSACAG00000002675	0.0134921	0.486186	0.0277509	1.18336e-50	0.0160755	0.542575	0.0296282	4.82799e-54	0.0147767	0.542575	0.0272345	6.25748e-55	4	66596457	66637513	66616985	1041
ENSACAG00000002682	0.0517984	1.06227	0.0487618	1.50384e-26	0.0465229	0.989318	0.0470252	7.92982e-27	0.0464887	0.99402	0.0467684	6.74215e-27	Un0816	71215	89035	80125	393
ENSACAG00000002683	0.0236159	0.763821	0.030918	8.6464e-46	0.033939	0.734549	0.0462038	2.93837e-40	0.0683905	0.762496	0.089693	2.17149e-32	5	119413291	119424464	119419000	765
ENSACAG00000002688	0.0320341	1.29982	0.024645	2.60266e-48	0.0345634	1.36333	0.0253522	1.55916e-48	0.0320117	1.51006	0.021199	3.57364e-52	Un0289	246705	253545	250125	576
ENSACAG00000002690	0.0837339	0.681274	0.122908	7.95093e-30	0.108527	0.706624	0.153585	2.01109e-26	0.0862898	0.701839	0.122948	9.31417e-31	Un0006	2160574	2177156	2168865	846
ENSACAG00000002691	0.0544579	0.816511	0.0666959	1.74433e-140	0.0569119	0.886505	0.0641981	1.28957e-148	0.0734567	0.89681	0.0819088	5.46126e-134	3	187653640	187710758	187682199	2868
ENSACAG00000002693	0.0920614	0.749466	0.122836	5.52937e-29	0.0912482	0.791464	0.115291	1.88304e-30	0.0906263	0.774518	0.11701	2.8895e-30	3	101163778	101179459	101172000	756
ENSACAG00000002697	0.0978422	0.832714	0.117498	5.79794e-16	0.19891	1.14625	0.173532	5.72841e-14	0.112495	0.841883	0.133623	2.35259e-15	Un0327	500927	525098	513012	366
ENSACAG00000002702	0.0888499	0.942452	0.0942752	1.14289e-45	0.0953943	1.02581	0.0929942	5.32917e-48	0.0933019	0.956037	0.0975924	4.08076e-45	1	61452028	61471821	61461900	990
ENSACAG00000002704	0.0527948	0.92135	0.0573015	4.43723e-26	0.155852	0.725559	0.214803	1.51613e-11	0.0824148	0.983329	0.083812	3.69919e-23	1	223354387	223354957	223354672	453
ENSACAG00000002705	0.160744	0.793675	0.202531	1.40133e-24	0.172889	0.831146	0.208013	8.90865e-25	0.173689	0.861587	0.201592	2.21152e-25	4	54051721	54088608	54070200	993
ENSACAG00000002706	0.0305275	1.54059	0.0198154	6.96992e-31	0.0348867	1.24783	0.0279579	7.78657e-27	0.0348999	1.17925	0.0295949	5.91475e-26	Un1466	11695	26186	18940.5	312
ENSACAG00000002707	0.153533	1.00148	0.153306	6.04179e-15	0.173181	1.19653	0.144737	6.158e-16	0.156903	1.17807	0.133186	1.93781e-17	Un0312	367718	433277	400498	375
ENSACAG00000002708	0.057492	0.768264	0.0748337	6.67603e-17	0.0621082	0.972369	0.063873	3.2296e-20	0.0711992	0.81143	0.0877453	1.24052e-16	3	28102927	28104029	28103478	348
ENSACAG00000002710	0.0825237	0.782877	0.105411	3.15273e-32	0.0783968	1.14981	0.0681825	5.03539e-46	0.0842757	0.840758	0.100238	4.19987e-34	Un0236	52718	77911	65314.5	765
ENSACAG00000002711	0.135443	0.919408	0.147315	5.48684e-112	0.156138	1.07574	0.145144	1.00888e-119	0.147237	1.13342	0.129905	2.52807e-130	1	88377153	88386720	88381900	3453
ENSACAG00000002712	0.0181035	0.454857	0.0398005	4.36675e-31	0.0144275	0.500885	0.0288041	1.19094e-35	0.073096	0.490316	0.149079	4.18045e-19	1	80336400	80365678	80351039	735
ENSACAG00000002713	0.0142942	0.654676	0.0218339	1.93464e-17	0.0191396	0.547599	0.0349518	2.62024e-14	0.0191164	0.73411	0.0260402	3.56477e-18	3	187765114	187770004	187767559	276
ENSACAG00000002715	0.0244971	0.778767	0.0314563	1.43571e-19	0.0286631	0.868673	0.0329965	1.56064e-20	0.0203583	1.03046	0.0197564	1.04917e-24	3	84597470	84689295	84643400	315
ENSACAG00000002720	0.0102612	0.560098	0.0183203	2.95624e-21	0.0137148	0.667999	0.0205312	1.6024e-23	0.0171831	0.728632	0.0235827	2.81005e-24	4	130266246	130275842	130271044	378
ENSACAG00000002721	0.0997097	0.959739	0.103892	4.46669e-40	0.12412	0.851009	0.145851	2.01825e-31	0.0945999	0.917002	0.103162	1.25826e-39	Un0621	65658	82077	73867.5	858
ENSACAG00000002722	0.0826634	1.19939	0.068921	4.80763e-38	0.09405	1.11947	0.0840127	9.38023e-35	0.0927363	1.08292	0.0856352	1.88616e-33	Un0798	117085	127080	122082	612
ENSACAG00000002723	NA	0.538114	0	NA	0.0364733	0.640769	0.0569212	5.53919e-16	0.0541467	0.479774	0.112859	7.77845e-11	2	130819345	130833477	130826411	333
ENSACAG00000002725	0.100423	1.05868	0.0948565	2.00382e-77	0.135375	1.14672	0.118055	1.11212e-70	0.115701	1.1637	0.0994255	2.63487e-79	Un0621	108082	111612	109847	1605
ENSACAG00000002726	0.0253651	0.472216	0.053715	2.35648e-127	0.0298118	0.474978	0.0627646	3.48116e-122	0.0306868	0.477906	0.064211	9.25977e-121	2	56415062	56441582	56428322	3477
ENSACAG00000002728	0.18138	0.829666	0.218618	1.0153e-06	0.185741	0.926668	0.20044	6.74649e-08	0.193333	0.971666	0.19897	4.17229e-08	1	221588262	221609345	221599000	240
ENSACAG00000002729	0.16317	1.57441	0.103639	2.10556e-22	0.310247	1.39096	0.223046	1.31932e-11	0.144406	1.10224	0.131011	2.21642e-18	5	3834648	3863911	3849280	429
ENSACAG00000002731	0.0793068	1.14056	0.0695331	2.99792e-200	0.0927098	1.16114	0.0798439	3.70423e-188	0.0835535	1.12349	0.0743697	1.52316e-193	Un0621	146488	156796	151642	3576
ENSACAG00000002732	0.0273263	0.415159	0.0658213	1.41569e-11	0.0193829	0.495567	0.0391126	5.38153e-15	0.0273384	0.545324	0.0501324	4.56396e-15	2	130771697	130809222	130790000	333
ENSACAG00000002733	0.122748	0.654088	0.187663	2.72718e-11	0.104701	0.897498	0.116659	1.05722e-17	0.11253	0.767377	0.146642	1.30754e-14	5	113294087	113300392	113297000	423
ENSACAG00000002734	0.0588832	1.12757	0.0522214	1.08764e-63	0.0715032	1.34374	0.053212	2.92113e-66	0.0658151	1.27567	0.0515927	3.27461e-66	3	200137892	200139008	200138450	975
ENSACAG00000002735	0.104127	0.537749	0.193636	4.43754e-08	0.415869	0.710713	0.585143	0.0324969	0.622553	2.52688	0.246372	4.8159e-06	5	119081616	119209255	119145000	330
ENSACAG00000002737	0.0571276	0.900984	0.0634057	2.59108e-15	0.0595603	1.24194	0.0479574	1.42225e-19	0.0714313	0.937628	0.076183	3.03218e-15	6	36525619	36566621	36546120	261
ENSACAG00000002739	0.0245111	1.09422	0.0224005	4.67362e-97	0.0309361	1.51116	0.0204717	1.08414e-110	0.032613	1.54649	0.0210884	7.14118e-110	3	200019381	200029207	200024294	1215
ENSACAG00000002741	0.171148	0.820747	0.208527	1.17382e-10	0.176278	0.708952	0.248646	8.16989e-09	0.177975	0.955186	0.186325	5.48166e-12	3	137453344	137474184	137463764	426
ENSACAG00000002746	0.0610827	0.824775	0.0740598	6.14186e-37	0.0621121	0.826708	0.0751319	3.04623e-36	0.0848961	0.959852	0.0884471	9.94142e-36	1	61494618	61507156	61500887	741
ENSACAG00000002747	0.134069	NA	NA	7.10228e-118	0.133723	NA	NA	1.10564e-125	0.138335	NA	NA	2.26723e-119	Un3150	5112	6469	5790.5	921
ENSACAG00000002749	0.222207	1.46881	0.151284	1.52431e-11	0.211612	1.44483	0.146462	5.79382e-12	0.223366	1.55833	0.143337	4.06028e-12	Un2111	1394	10114	5754	279
ENSACAG00000002750	0.0292019	1.05896	0.027576	1.12681e-50	0.0425004	1.23262	0.0344796	7.89859e-50	0.0509158	0.990664	0.0513956	6.2903e-42	1	88359018	88368269	88363600	657
ENSACAG00000002751	0.109762	0.908866	0.120768	1.36479e-09	0.0996538	1.71239	0.0581958	1.13569e-14	0.147004	1.08562	0.13541	2.34172e-09	3	101112268	101115774	101114021	216
ENSACAG00000002752	0.0732524	0.697291	0.105053	0.00593429	0.125489	1.52938	0.082052	0.000784459	0.098827	3.29584	0.0299854	4.90326e-05	2	29529620	29538980	29534300	54
ENSACAG00000002753	0.0866601	1.38341	0.0626423	4.86042e-12	0.086779	1.00353	0.0864739	7.34606e-11	0.0866601	0.839547	0.103223	2.38198e-08	Un2111	17103	17286	17194.5	174
ENSACAG00000002758	0.192355	0.859215	0.223873	8.35551e-06	0.189849	1.19228	0.159232	8.89129e-08	0.229442	0.861218	0.266416	4.10902e-05	3	187794946	187795252	187795099	192
ENSACAG00000002759	0.0141222	0.368481	0.0383254	6.47701e-15	0.0244211	0.407363	0.0599493	2.72064e-14	0.027889	0.353278	0.0789433	8.07276e-12	2	29349567	29393299	29371433	390
ENSACAG00000002761	0.0531844	0.76416	0.0695985	7.25375e-239	0.0643404	0.793482	0.0810863	4.70185e-227	0.0720778	0.923854	0.0780185	9.8198e-249	Un0017	651546	708883	680214	5157
ENSACAG00000002763	0.183191	1.09438	0.167392	2.02381e-19	0.215915	0.984709	0.219268	3.78133e-15	0.216009	0.972777	0.222054	1.57924e-14	1	69516447	69517494	69517000	573
ENSACAG00000002767	0.0788733	0.915261	0.0861757	1.29597e-06	0.153546	0.639671	0.240039	0.00249839	0.159399	0.703599	0.226548	0.000985214	Un0842	28009	34893	31451	120
ENSACAG00000002768	0.0626922	0.709823	0.0883209	8.866e-17	0.120802	1.02793	0.117521	3.76777e-17	0.0902295	0.677224	0.133234	2.67039e-13	6	69400602	69415614	69408108	372
ENSACAG00000002769	0.00619527	0.482218	0.0128475	4.19354e-34	0.096036	0.598059	0.160579	9.81627e-17	0.0145139	0.445133	0.0326058	2.56721e-26	1	218840336	218915069	218878000	624
ENSACAG00000002770	0.0317986	1.13908	0.027916	8.97771e-74	0.0942168	1.44697	0.065113	4.32714e-59	0.0464227	1.03423	0.0448864	1.08945e-61	Un0236	81632	111555	96593.5	969
ENSACAG00000002771	0.0395584	0.459473	0.0860951	1.55408e-54	0.0450867	0.544997	0.0827283	2.66845e-62	0.0418969	0.546216	0.0767038	2.16926e-64	1	43825941	43890599	43858270	1728
ENSACAG00000002772	0.07827	0.644177	0.121504	3.52833e-26	0.106857	0.86044	0.124189	1.76568e-29	0.11191	1.04483	0.107108	4.2085e-34	5	132230080	132291721	132261000	759
ENSACAG00000002773	0.0331422	0.633826	0.0522891	3.49344e-43	0.0362407	0.894504	0.0405148	1.79954e-56	0.0481341	0.845636	0.0569206	1.37081e-48	4	130279677	130312380	130296000	870
ENSACAG00000002776	0.0470108	1.71267	0.0274489	1.40148e-31	0.0490271	3.34148	0.0146723	1.81002e-37	0.0348849	NA	NA	2.21429e-42	3	39259817	39263829	39261823	345
ENSACAG00000002778	0.0601868	0.491603	0.12243	1.84963e-13	0.0617472	0.539186	0.114519	2.82762e-15	0.0872406	0.507725	0.171826	3.43529e-11	3	137505652	137597944	137551798	465
ENSACAG00000002779	0.105976	1.08244	0.0979048	3.37625e-39	0.293872	0.957449	0.306932	2.29844e-14	0.137228	0.864805	0.158681	1.83728e-26	Un0723	89035	111068	100052	789
ENSACAG00000002780	0.0395973	0.907921	0.0436132	6.76597e-58	0.0555978	0.839635	0.0662166	5.59562e-48	0.101852	0.942916	0.108018	7.68443e-40	2	29307470	29333166	29320318	945
ENSACAG00000002781	0.00654321	0.631689	0.0103583	7.48718e-26	0.00326077	0.847038	0.00384961	3.36336e-33	0.00653289	0.720869	0.00906252	1.80323e-28	3	84257564	84258091	84257800	396
ENSACAG00000002782	0.0950271	0.360216	0.263806	8.90474e-05	0.100253	0.482846	0.20763	1.28918e-06	0.0903995	0.4502	0.200799	1.92296e-06	1	223705803	223715183	223710493	294
ENSACAG00000002787	0.0760789	0.329609	0.230815	0.0112345	0.0942018	0.347247	0.271282	0.0127115	0.0880759	0.266727	0.33021	0.0610846	1	221685309	221700284	221693000	123
ENSACAG00000002788	0.0286758	0.96736	0.0296434	9.94172e-48	0.0328893	0.939872	0.0349934	2.72141e-45	0.0667365	1.01631	0.0656654	2.73262e-39	a	2123967	2137306	2130640	654
ENSACAG00000002790	0.102145	0.791656	0.129027	1.56721e-22	0.106995	0.979891	0.10919	7.81186e-27	0.110961	0.918942	0.120748	3.3426e-24	3	39245141	39255166	39250200	567
ENSACAG00000002791	0.149318	0.452879	0.329709	1.66795e-05	0.127586	0.503309	0.253495	1.54381e-07	0.136045	0.458569	0.296673	2.36453e-06	1	223722049	223726185	223724117	411
ENSACAG00000002795	0.0240477	0.58759	0.040926	4.7361e-43	0.0240234	0.624318	0.0384795	2.02679e-45	0.0279695	0.61877	0.0452018	1.42434e-42	2	130560179	130577513	130568846	855
ENSACAG00000002797	0.0906265	0.47945	0.189022	3.57797e-07	0.0860787	0.537185	0.16024	1.41258e-08	0.135199	0.582674	0.232032	1.08718e-06	Un0103	113597	136514	125056	270
ENSACAG00000002805	0.017019	0.412358	0.0412725	2.35283e-17	0.0232673	0.512318	0.0454157	1.34783e-19	0.0344333	0.561405	0.0613342	1.97336e-18	1	221716971	221740189	221728580	423
ENSACAG00000002806	0.0666475	0.807744	0.0825106	3.37798e-23	0.131012	0.93679	0.139852	5.85545e-18	0.111033	0.9693	0.11455	7.75027e-21	6	36445679	36453110	36449400	504
ENSACAG00000002814	0.0665257	0.597939	0.111258	9.73689e-17	0.0964535	0.568008	0.16981	3.20848e-12	0.0934238	0.625333	0.149399	4.60627e-14	3	145377440	145385983	145382000	459
ENSACAG00000002815	0.106093	0.704733	0.150543	5.0953e-22	0.194284	1.06414	0.182573	4.52363e-22	0.135011	0.923769	0.146152	2.39258e-25	4	66473104	66509581	66491300	699
ENSACAG00000002816	0.220528	1.01417	0.217447	3.51274e-11	0.197859	1.13617	0.174146	1.08581e-13	0.196022	1.0291	0.190479	5.46908e-13	Un0289	256809	275764	266286	393
ENSACAG00000002819	0.246651	1.12874	0.21852	8.45659e-11	0.241078	0.742861	0.324526	1.72798e-06	0.252669	0.943937	0.267676	1.55026e-08	Un0756	17228	21665	19446.5	336
ENSACAG00000002820	0.185683	0.974868	0.19047	4.43532e-13	0.22689	1.52075	0.149196	1.79524e-16	0.119295	1.27869	0.0932947	1.50465e-22	Un0327	471862	495315	483588	378
ENSACAG00000002823	0.00358618	0.680891	0.0052669	2.30795e-49	0.00358305	0.80943	0.00442663	1.06365e-55	0.0035853	0.954979	0.00375432	4.80552e-62	1	61511751	61564635	61538193	711
ENSACAG00000002824	0.142399	0.753993	0.18886	5.42355e-07	0.188331	1.25533	0.150025	2.60114e-09	0.191593	1.46221	0.13103	9.36405e-11	1	88276792	88297597	88287200	225
ENSACAG00000002827	0.0373743	0.656602	0.0569208	1.41746e-11	0.0373603	0.563954	0.0662471	4.31674e-10	0.0428447	0.564567	0.0758895	1.25046e-09	Un0241	228872	274420	251646	240
ENSACAG00000002828	NA	1.13924	0	NA	NA	1.72875	0	NA	NA	0.819436	0	NA	Un0312	322532	329196	325864	156
ENSACAG00000002829	0.0859472	0.820537	0.104745	1.48486e-11	0.0861119	0.990721	0.0869184	1.37187e-13	0.0916695	1.26701	0.072351	1.05454e-15	4	54091688	54107080	54099384	246
ENSACAG00000002832	0.0529833	0.946138	0.0559995	8.18182e-26	0.0572663	0.689659	0.0830357	2.32727e-19	0.0637956	0.685659	0.0930428	2.20917e-18	6	36424092	36441796	36432944	432
ENSACAG00000002834	0.0529626	0.934865	0.0566527	4.24485e-54	0.0661775	1.22575	0.0539892	6.15752e-61	0.0580244	1.12445	0.0516027	1.68063e-59	Un0331	325188	366475	345832	942
ENSACAG00000002841	0.0430081	0.349036	0.12322	1.80225e-08	0.0431013	0.500735	0.0860761	1.35148e-12	0.0553253	0.576982	0.0958873	3.92043e-13	Un0017	855181	879795	867488	342
ENSACAG00000002843	0.0922744	1.54386	0.0597687	1.84909e-41	0.0977276	1.88732	0.0517811	2.7413e-44	0.0845633	1.9647	0.0430413	2.03746e-46	Un0274	534858	535803	535330	588
ENSACAG00000002847	0.0796819	1.03603	0.0769107	1.89521e-66	0.103728	1.1118	0.0932971	1.61311e-60	0.0938821	0.919241	0.10213	9.77083e-55	6	69322210	69328570	69325390	1224
ENSACAG00000002851	0.0710899	0.952122	0.0746647	2.34926e-21	0.092117	1.39566	0.0660024	1.03865e-25	0.0985079	1.53871	0.0640197	6.75401e-26	Un0274	485359	493681	489520	375
ENSACAG00000002853	0.219497	0.730618	0.300426	2.64822e-18	0.246118	0.835888	0.294439	8.41768e-20	0.241702	0.901745	0.268038	3.61182e-23	1	221751681	221761232	221756000	1191
ENSACAG00000002858	0.0284713	0.495989	0.0574031	4.06779e-42	0.0635038	0.535452	0.118598	3.27183e-33	0.0624308	0.549843	0.113543	4.90052e-34	6	8001268	8032994	8017131	1041
ENSACAG00000002859	0.112222	0.773463	0.14509	2.07954e-08	0.0975773	0.778278	0.125376	3.90853e-09	0.122873	0.703967	0.174543	8.9264e-07	Un0146	67097	69371	68234	207
ENSACAG00000002863	0.0609178	0.824537	0.0738812	2.36535e-33	0.0686835	0.681173	0.100831	5.8775e-26	0.0706342	0.760927	0.0928266	1.57285e-28	Un0065	1169335	1176212	1172770	672
ENSACAG00000002865	0.0121126	0.210735	0.0574777	0.00612368	0.0120868	0.27687	0.0436554	0.00124706	0.0242678	0.282426	0.0859264	0.0035235	Un0146	71803	72517	72160	105
ENSACAG00000002867	0.0356168	0.930993	0.0382568	8.24784e-84	0.0411382	1.01632	0.0404777	3.76247e-86	0.0404466	1.22822	0.0329311	1.35514e-97	1	221761585	221765958	221764000	1263
ENSACAG00000002874	0.0809695	0.695332	0.116447	3.0751e-25	0.0933103	0.902019	0.103446	5.33425e-30	0.0923978	0.695985	0.132758	1.13074e-22	4	119494294	119504888	119499591	672
ENSACAG00000002875	0.0934647	0.888005	0.105252	5.28366e-13	0.137979	0.988055	0.139647	4.21628e-12	0.152797	0.919003	0.166264	2.05274e-10	Un0001	14302922	14307094	14305008	291
ENSACAG00000002876	0.020216	0.497099	0.040668	6.44198e-20	0.0201856	0.562698	0.0358728	2.96092e-22	0.0231166	0.678251	0.0340827	2.1966e-25	1	221813722	221825816	221819769	450
ENSACAG00000002877	0.00286363	0.391094	0.0073221	9.1665e-23	0.00573041	0.552544	0.0103709	7.32713e-29	0.00860249	0.573363	0.0150036	1.49185e-28	Un0146	78342	86287	82314.5	468
ENSACAG00000002878	0.0957035	0.759197	0.126059	7.52289e-34	0.118099	0.788692	0.149741	1.21449e-30	0.115882	0.801273	0.144623	3.97918e-32	Un0001	14275509	14297466	14286500	981
ENSACAG00000002880	0.0499226	1.5153	0.0329456	2.09776e-22	0.0870094	0.929249	0.093634	3.32393e-13	0.0814178	1.42176	0.0572656	2.14164e-18	5	54594117	54605754	54599900	267
ENSACAG00000002888	0.117276	0.297051	0.394799	0.0210722	0.155774	0.475105	0.327874	0.0016597	0.153775	0.553124	0.278013	0.000247378	1	211551138	211563279	211557000	204
ENSACAG00000002889	0.0859856	0.84217	0.1021	0.000237845	0.109935	0.567197	0.193821	0.00995884	0.0637112	0.475287	0.134048	0.00446657	5	118717948	118726270	118722109	69
ENSACAG00000002890	0.0028301	0.391153	0.00723527	1.32557e-21	0.00566813	0.441899	0.0128268	1.02123e-22	0.00282732	0.460348	0.00614171	1.03404e-24	2	163350119	163366597	163358358	459
ENSACAG00000002891	0.00554508	0.536117	0.010343	3.43945e-13	0.0224919	0.66823	0.0336589	4.98497e-13	0.0224699	0.622113	0.0361187	2.84697e-12	6	36384905	36413924	36399400	228
ENSACAG00000002892	0.0895524	0.767207	0.116725	1.13496e-15	0.117744	0.831864	0.141542	1.84378e-14	0.105301	0.747456	0.14088	8.16939e-14	3	39228705	39243011	39235858	378
ENSACAG00000002895	0.00815162	0.497656	0.01638	2.91308e-25	0.0223356	0.683344	0.0326858	4.34825e-28	0.01361	0.639024	0.0212981	6.39942e-29	Un0013	4221141	4233809	4227475	480
ENSACAG00000002896	0.00494265	0.39831	0.0124091	6.39604e-12	0.114944	NA	NA	2.03673e-29	0.114944	NA	NA	1.21476e-33	6	36269688	36328728	36299208	258
ENSACAG00000002899	0.0631482	0.697532	0.0905309	1.1566e-29	0.0702973	0.800963	0.087766	9.80426e-33	0.05788	0.860536	0.0672604	3.87002e-38	Un0001	14215116	14246734	14230925	684
ENSACAG00000002903	0.13712	0.899256	0.152482	4.73111e-26	0.154076	1.15783	0.133074	5.19507e-30	0.151164	1.2038	0.125572	4.15084e-31	4	119422596	119430503	119427000	750
ENSACAG00000002909	0.0279034	0.753841	0.0370149	2.89541e-35	0.0353075	1.02812	0.0343417	3.24893e-41	0.144295	0.903594	0.159691	9.60652e-20	3	101022695	101040093	101031394	618
ENSACAG00000002911	0.0338602	0.595578	0.0568526	4.05438e-17	0.0262703	0.862583	0.0304554	1.24064e-26	0.0299975	0.68065	0.0440719	6.03492e-20	4	54163383	54198528	54181000	357
ENSACAG00000002914	0.100525	0.512819	0.196025	2.5162e-13	0.115217	0.573002	0.201077	1.72152e-13	0.11676	0.574337	0.203294	2.62274e-13	3	145217554	145248823	145233000	597
ENSACAG00000002919	0.104916	1.03659	0.101213	8.64092e-80	0.115527	1.28072	0.0902049	2.44466e-90	0.110019	1.25392	0.0877398	2.0478e-90	6	36184924	36233244	36209084	1824
ENSACAG00000002920	0.067632	1.2687	0.0533081	2.03442e-50	0.0793058	1.19651	0.066281	1.63945e-45	0.0757915	0.992775	0.076343	2.61731e-40	Un0327	440898	446199	443548	747
ENSACAG00000002923	0.0280331	0.765768	0.0366078	1.51895e-36	0.0268225	0.722488	0.0371252	6.69756e-36	0.0268198	0.778946	0.0344309	3.57038e-38	3	180488054	180506069	180497000	582
ENSACAG00000002925	0.0810905	1.23584	0.0656159	7.72724e-55	0.0784735	1.33956	0.0585814	1.24697e-57	0.0933597	1.21697	0.0767147	3.1782e-50	Un0065	1254276	1255247	1254760	891
ENSACAG00000002926	0.0537956	0.847792	0.0634538	3.82538e-45	0.059835	1.03434	0.0578484	1.83939e-50	0.0684816	0.84299	0.0812366	5.23277e-40	Un0331	396484	408974	402729	822
ENSACAG00000002927	0.0700128	0.708369	0.0988367	2.05972e-77	0.0991904	0.825549	0.120151	1.70129e-74	0.0749291	0.826123	0.0906997	1.44097e-87	4	130353635	130365521	130359578	2016
ENSACAG00000002930	0.0250511	0.526906	0.0475438	3.09805e-36	0.0481291	0.612699	0.0785526	6.25658e-34	0.0298853	0.578525	0.0516578	9.50752e-38	2	163306758	163337692	163322225	837
ENSACAG00000002931	0.0622429	0.458393	0.135785	1.27023e-10	0.0659231	0.505144	0.130504	1.75665e-11	0.0660485	0.592814	0.111415	9.74079e-14	4	54231910	54236252	54234081	375
ENSACAG00000002932	0.0859211	1.88053	0.0456897	5.66359e-10	1.08532	1.60067	0.678041	0.476802	0.206757	1.99316	0.103733	2.00019e-06	Un0168	945548	996964	971256	108
ENSACAG00000002933	0.0303902	0.513278	0.0592081	2.17083e-18	0.0411384	0.742802	0.0553827	4.44728e-24	0.0427115	0.729072	0.0585833	9.46497e-23	3	39221250	39223387	39222300	438
ENSACAG00000002934	0.0723695	0.739164	0.0979073	5.44666e-16	0.112998	0.837608	0.134906	1.42693e-14	0.0951034	0.900811	0.105575	1.09326e-16	Un0146	92730	95666	94198	375
ENSACAG00000002935	0.0516027	0.748306	0.0689594	1.84132e-21	0.053147	0.650328	0.0817233	3.55641e-19	0.0562208	0.66931	0.0839981	2.61059e-19	3	145199898	145206116	145203007	456
ENSACAG00000002939	0.0735861	0.838133	0.0877977	2.00635e-27	0.0335088	1.00249	0.0334256	1.92013e-42	0.0359263	0.993238	0.0361709	1.63324e-41	4	54981766	54989741	54985800	579
ENSACAG00000002940	0.054822	0.765177	0.0716463	1.14276e-29	0.0537101	0.65796	0.0816313	2.31108e-25	0.0514423	0.672355	0.0765107	1.98421e-26	1	43779735	43796210	43788000	600
ENSACAG00000002943	0.0405345	0.970208	0.0417792	8.1163e-69	0.0312006	0.927232	0.0336492	6.17681e-72	0.0236523	0.928018	0.0254869	9.31231e-77	6	8095983	8110818	8103400	1077
ENSACAG00000002944	0.0108316	1.22705	0.0088273	4.79042e-22	0.0274302	0.876436	0.0312975	1.11514e-15	0.245631	0.945704	0.259733	7.70047e-06	Un0090	325779	343622	334700	234
ENSACAG00000002945	0.207861	1.18937	0.174766	5.18891e-31	0.212285	1.57475	0.134806	7.06134e-39	0.212213	1.723	0.123165	2.61315e-41	Un0065	997389	1019865	1008627	1053
ENSACAG00000002947	0.0904864	0.740803	0.122146	5.50424e-21	0.106259	0.862641	0.123179	1.14236e-22	0.108654	0.930428	0.116778	4.84179e-24	Un0331	410878	427168	419023	585
ENSACAG00000002951	0.178446	0.596306	0.299252	7.16864e-21	0.214924	0.653245	0.329009	4.12763e-19	0.218034	0.700381	0.311307	3.50398e-21	5	132498167	132528492	132513000	1416
ENSACAG00000002953	0.117346	0.531802	0.220656	2.34237e-07	0.128877	0.606409	0.212525	8.24679e-08	0.130819	0.510946	0.256033	1.42026e-06	5	113436610	113487456	113462033	327
ENSACAG00000002955	0.0414238	0.608312	0.0680963	9.26852e-87	0.0646307	0.778003	0.0830726	5.32696e-92	0.0521802	0.713095	0.0731744	1.21198e-92	5	118554242	118574718	118564480	2052
ENSACAG00000002956	0.14916	0.622336	0.239677	2.21691e-06	0.176071	0.717161	0.245511	3.2317e-07	0.176481	0.63398	0.27837	1.2178e-05	Un0065	848611	849030	848820	288
ENSACAG00000002960	0.122545	1.02148	0.119968	6.83054e-65	0.130659	1.09292	0.11955	1.04498e-66	0.152862	1.13089	0.13517	3.34442e-61	Un0065	794127	801516	797822	1578
ENSACAG00000002962	0.0907616	0.876334	0.10357	9.08243e-23	0.0892585	0.866257	0.103039	3.6756e-22	0.105946	0.920985	0.115036	4.02875e-22	3	100939897	100942012	100941000	507
ENSACAG00000002964	0.0510391	1.00983	0.0505423	4.16756e-58	0.0598864	1.2816	0.0467279	2.77881e-64	0.0664469	1.205	0.0551428	1.81082e-59	3	39181970	39203868	39192919	882
ENSACAG00000002966	0.00390584	1.12731	0.00346476	7.31971e-32	1.12506	NA	NA	0.00721002	0.00391112	1.11459	0.003509	9.84531e-32	Un0013	4133491	4180780	4157140	327
ENSACAG00000002971	0.181794	0.65317	0.278325	2.60449e-29	0.202843	0.710001	0.285694	1.92143e-29	0.184781	0.751726	0.245809	5.02648e-36	Un0114	681916	686203	684060	1800
ENSACAG00000002973	0.118005	0.669841	0.176169	0.000872059	0.083281	0.6192	0.134498	0.000111775	0.0700065	0.51836	0.135054	0.000235069	Un0241	204972	223483	214228	105
ENSACAG00000002976	0.0284144	0.806595	0.0352276	2.87667e-18	0.0435128	0.766501	0.0567681	1.91668e-15	0.0470734	0.98776	0.0476567	7.08111e-18	Un0065	754336	761834	758085	261
ENSACAG00000002978	0.00339135	0.462454	0.00733339	7.34187e-40	0.00849924	0.649063	0.0130946	2.0511e-48	0.00679012	0.583083	0.0116452	1.69904e-45	5	132534695	132541499	132538097	762
ENSACAG00000002984	0.125811	0.595608	0.211231	1.93162e-06	0.149	0.492071	0.302803	0.000234944	0.130906	0.561412	0.233172	8.19671e-06	6	36150749	36158891	36154820	258
ENSACAG00000002987	0.00662327	0.872811	0.00758843	2.65432e-35	0.0166311	0.795471	0.0209073	7.89344e-30	0.062004	0.899743	0.068913	1.57407e-23	3	100882193	100938109	100910151	408
ENSACAG00000002988	0.0231582	0.842473	0.0274884	2.11663e-13	0.0309877	1.00156	0.0309394	3.02145e-14	0.031698	1.00659	0.0314905	4.35442e-14	5	54611983	54623083	54617533	177
ENSACAG00000002989	0.176913	1.31191	0.134852	2.73281e-20	0.251134	1.57035	0.159922	1.66019e-16	0.174181	1.42607	0.12214	3.0965e-21	Un0299	1832	2768	2300	450
ENSACAG00000002994	0.0458494	0.524086	0.0874845	1.70515e-48	0.0732762	0.576027	0.12721	6.22284e-42	0.0837626	0.505159	0.165814	2.57109e-32	Un0665	32527	53853	43190	1371
ENSACAG00000002995	0.0491333	0.982322	0.0500175	1.13693e-30	0.0769382	0.740692	0.103873	4.34256e-20	0.126655	0.796633	0.158988	1.59397e-15	Un0146	97539	108056	102798	462
ENSACAG00000002999	0.0067702	0.570529	0.0118665	1.58088e-78	0.00676592	0.623332	0.0108545	2.61696e-84	0.00773808	0.685875	0.011282	1.12356e-89	Un0127	98771	177674	138222	1344
ENSACAG00000003002	0.144766	2.00039	0.0723688	2.87895e-61	0.160255	1.63559	0.0979799	9.8971e-52	0.161042	2.63935	0.0610157	1.17729e-63	Un0683	40365	42879	41622	1011
ENSACAG00000003003	0.155664	0.480643	0.323866	0.00598901	0.12951	0.637828	0.203049	0.000103005	0.120195	0.854835	0.140607	3.03451e-07	Un0241	112702	138343	125522	159
ENSACAG00000003004	0.156523	0.844604	0.185322	2.62304e-26	0.152299	0.973469	0.15645	8.73809e-31	0.116543	0.827184	0.140891	6.36799e-32	f	2268934	2276631	2272780	885
ENSACAG00000003008	0.0940161	1.07113	0.087773	4.55092e-36	0.100459	1.02311	0.0981901	1.1301e-33	0.0947322	1.40566	0.0673932	5.37733e-43	3	137703803	137726489	137715146	717
ENSACAG00000003010	0.0410185	0.535928	0.0765372	4.33896e-87	0.045745	0.573947	0.0797025	6.33781e-90	0.0431064	0.587796	0.0733357	7.68217e-94	5	113511674	113533952	113522813	2403
ENSACAG00000003013	0.0658474	0.83044	0.0792923	5.65139e-19	0.0658032	0.671176	0.0980416	1.37219e-15	0.0618944	0.555838	0.111353	2.51381e-13	4	55344071	55344509	55344290	351
ENSACAG00000003014	0.133213	0.915452	0.145516	1.36456e-30	0.156289	1.15462	0.13536	2.03292e-34	0.159804	1.17552	0.135943	2.73149e-34	Un0683	55619	57797	56708	828
ENSACAG00000003015	0.0908548	0.644077	0.141062	1.2078e-60	0.097515	0.719072	0.135612	1.08042e-66	0.098852	0.709564	0.139314	5.4862e-65	2	51134440	51151419	51142900	2109
ENSACAG00000003016	0.0759907	0.847287	0.0896871	4.51759e-19	0.0994241	0.866973	0.11468	1.90404e-16	0.112579	0.912312	0.123399	1.28436e-16	Un0017	882794	897267	890030	399
ENSACAG00000003019	0.0754653	0.938124	0.0804428	1.02859e-20	0.0759267	1.14581	0.0662649	2.93931e-24	0.0820429	1.09848	0.0746875	2.95015e-22	Un0788	87481	93815	90648	375
ENSACAG00000003022	0.0427647	0.801855	0.0533323	2.61625e-22	0.0427506	0.738617	0.0578792	8.35715e-21	0.0429042	0.665796	0.0644406	4.60256e-19	3	137746528	137750396	137748462	387
ENSACAG00000003026	0.0353059	0.525082	0.0672388	8.88997e-13	0.0353044	0.691483	0.0510561	2.54037e-16	0.172848	0.77513	0.222992	7.76812e-08	6	69002466	69068705	69035600	285
ENSACAG00000003027	0.0678654	0.850049	0.0798371	0.00523453	0.670734	NA	NA	0.000374467	0.0678654	1.54059	0.0440515	0.000721211	4	55500561	55581211	55540886	30
ENSACAG00000003028	0.0953357	0.853183	0.111741	4.36876e-47	0.123441	0.885497	0.139403	2.54332e-41	0.128212	0.909629	0.14095	5.57685e-42	1	43715165	43730500	43722800	1164
ENSACAG00000003029	0.0709901	0.684734	0.103675	6.71656e-27	0.0910294	0.866563	0.105046	4.72472e-30	0.0753693	0.747569	0.100819	1.3904e-28	1	88217515	88235162	88226300	669
ENSACAG00000003030	0.0979933	0.718597	0.136368	2.10394e-18	0.107674	1.04813	0.10273	9.96599e-25	0.108724	0.994631	0.109311	7.14478e-24	Un0331	438328	480999	459664	537
ENSACAG00000003031	NA	0.203632	0	NA	0.11786	0.449725	0.262072	1.50686e-15	0.0231962	0.283734	0.0817536	1.6076e-24	Un0114	727403	771934	749668	1083
ENSACAG00000003035	0.0541731	0.65369	0.0828727	1.23322e-24	0.0655486	0.768449	0.0852999	1.3934e-26	0.0643834	0.738882	0.0871363	2.40519e-26	5	113678540	113713806	113696173	609
ENSACAG00000003037	0.250342	1.60314	0.156158	2.7213e-06	0.112927	0.989623	0.114112	2.22827e-07	0.124569	1.12076	0.111147	1.04497e-07	f	2222602	2249503	2236050	132
ENSACAG00000003038	0.00665621	0.604345	0.0110139	4.06048e-59	0.00732001	0.64427	0.0113617	1.52056e-62	0.0147156	0.683013	0.0215451	8.42872e-59	5	118512475	118531855	118522165	969
ENSACAG00000003039	NA	0.582063	0	NA	NA	0.738848	0	NA	NA	0.818794	0	NA	4	10758900	10764173	10761500	291
ENSACAG00000003041	0.0831375	0.472693	0.175881	1.31428e-38	0.09107	0.530854	0.171554	2.67238e-42	0.0833712	0.564195	0.14777	3.21872e-49	1	61643302	61701422	61672362	1833
ENSACAG00000003044	0.0813504	0.452209	0.179896	3.47665e-08	0.088081	0.378766	0.232547	8.64476e-06	0.102214	0.446293	0.229029	1.94481e-06	1	135860851	135874646	135868000	318
ENSACAG00000003046	0.12344	0.828793	0.14894	6.03152e-18	0.123576	0.849463	0.145476	1.97108e-18	0.139339	0.837924	0.166291	3.04432e-16	3	39161490	39162018	39161754	462
ENSACAG00000003047	0.185727	0.588697	0.315488	1.06963e-07	0.188095	0.90152	0.208642	1.12236e-13	0.193477	0.876328	0.220782	4.8416e-13	Un0001	14165369	14184137	14174753	507
ENSACAG00000003048	0.079218	0.694146	0.114123	2.60711e-35	0.109631	0.804829	0.136217	2.56754e-34	0.41116	1.18759	0.346213	9.5125e-14	3	39126778	39140216	39133497	948
ENSACAG00000003051	NA	2.03104	0	NA	NA	2.03104	0	NA	1.7969	NA	NA	0.343256	Un0501	227824	234276	231050	30
ENSACAG00000003052	0.00380792	0.273938	0.0139006	4.3204e-11	0.0409097	NA	NA	4.43564e-48	0.0452631	NA	NA	3.89487e-45	Un0013	4047254	4083127	4065190	333
ENSACAG00000003056	0.0370551	0.9246	0.0400769	2.26521e-14	1.09334	NA	NA	0.00106874	0.0629376	1.07114	0.0587577	1.20582e-13	3	137828480	137880261	137854000	213
ENSACAG00000003059	0.023119	0.455081	0.050802	1.03108e-23	0.0231003	0.624796	0.0369726	6.27645e-32	0.0338777	0.556108	0.0609192	1.0464e-25	4	119280580	119292506	119286543	618
ENSACAG00000003060	0.0476648	0.867511	0.0549443	4.90974e-39	0.0431178	0.880562	0.0489662	1.13281e-40	0.0532407	0.89652	0.059386	2.82003e-39	Un0090	302158	309354	305756	645
ENSACAG00000003061	0.100919	1.02551	0.0984088	7.002e-38	0.105428	1.43623	0.073406	1.14919e-48	0.143185	1.38688	0.103243	4.54182e-39	Un0983	31894	42749	37321.5	837
ENSACAG00000003064	0.0713929	0.72031	0.0991142	8.3705e-17	0.0829936	0.953169	0.0870712	5.11677e-19	0.0720366	0.745039	0.0966884	2.26381e-16	3	188730231	188763977	188747104	378
ENSACAG00000003065	0.212502	0.78865	0.26945	0.000493532	0.281397	2.33238	0.120648	2.66732e-07	0.223326	0.801601	0.278599	0.000554519	Un0103	1163633	1183086	1173360	150
ENSACAG00000003067	0.256149	0.849225	0.301627	2.37256e-19	0.259685	0.899166	0.288807	1.44175e-20	0.266871	0.920169	0.290024	1.17978e-20	2	163284370	163290104	163287237	1092
ENSACAG00000003072	0.016037	0.383743	0.041791	6.0237e-10	0.0324473	0.570807	0.0568447	4.83077e-12	0.02144	0.506346	0.0423425	5.29002e-12	Un0029	1992584	2038721	2015650	249
ENSACAG00000003074	0.187539	0.744741	0.251818	3.76073e-13	0.197962	1.00204	0.197559	3.54591e-18	0.192357	0.975887	0.19711	4.58352e-18	1	88194805	88210075	88202440	597
ENSACAG00000003075	0.224755	0.915032	0.245625	1.15763e-05	0.375121	2.04808	0.183158	4.17511e-07	0.242363	1.05433	0.229874	1.23011e-06	Un0723	32898	83736	58317	192
ENSACAG00000003077	0.0901983	0.528983	0.170513	7.60626e-13	0.0896967	0.568788	0.157698	7.87619e-15	0.0904885	0.651527	0.138887	1.40643e-16	4	55799948	55810871	55805400	516
ENSACAG00000003080	0.00724429	1.00215	0.00722872	8.64342e-32	0.0181999	0.806549	0.0225652	1.41463e-24	0.0579041	1.10029	0.0526264	9.35094e-24	Un0065	537492	572520	555006	357
ENSACAG00000003082	0.0397411	0.141303	0.281246	0.0767687	0.0236234	0.205172	0.11514	0.00157288	0.0236483	0.238701	0.0990706	0.000444276	1	102183639	102243517	102213578	168
ENSACAG00000003083	0.0622798	0.576653	0.108002	1.416e-35	0.0730064	0.562292	0.129837	4.04971e-31	0.0904633	0.612832	0.147615	3.60029e-30	Un0114	819745	839200	829472	1011
ENSACAG00000003084	0.0702524	0.738858	0.0950824	4.0853e-16	0.06593	0.626668	0.105207	4.39482e-14	0.109798	0.540733	0.203054	1.08179e-08	1	135884048	135909556	135896802	345
ENSACAG00000003085	0.0592941	0.482548	0.122877	2.8531e-07	0.110128	0.535596	0.205618	2.35354e-05	0.0828152	0.577112	0.143499	5.87656e-07	Un0017	971332	979520	975426	213
ENSACAG00000003090	0.00913001	0.53056	0.0172082	1.72382e-30	0.0114068	0.719922	0.0158445	8.84186e-38	0.00681937	0.743591	0.00917086	7.16025e-41	4	130382669	130387371	130385020	567
ENSACAG00000003091	0.109605	0.828926	0.132226	3.86874e-15	0.127165	1.18483	0.107327	1.81964e-18	0.139444	1.13403	0.122963	7.97243e-17	Un0146	110142	111832	110987	378
ENSACAG00000003094	0.0540672	0.407332	0.132735	2.44913e-35	0.0559476	0.490254	0.11412	8.29141e-44	0.0540709	0.475637	0.113681	5.93105e-43	1	211669963	211717071	211693517	1521
ENSACAG00000003095	0.0931327	0.862543	0.107975	3.55149e-20	0.0943687	0.810581	0.116421	3.14149e-19	0.1076	0.996505	0.107978	1.04941e-21	4	55850573	55890221	55870397	453
ENSACAG00000003097	0.00429816	0.423789	0.0101422	1.09579e-30	0.00646125	0.54829	0.0117844	8.09116e-37	0.00430131	0.482767	0.0089097	2.70795e-34	Un0013	3673861	3794654	3734260	618
ENSACAG00000003098	0.0551059	0.830919	0.0663192	1.27647e-44	0.0635894	0.874911	0.072681	3.99396e-44	0.0695493	1.00561	0.0691614	1.66127e-48	4	87280931	87282074	87281500	843
ENSACAG00000003100	0.101262	0.75569	0.133999	3.80161e-11	0.108432	0.799364	0.135648	1.04116e-11	0.110731	0.929152	0.119174	8.61716e-13	6	35938435	35959475	35948955	291
ENSACAG00000003103	NA	1.41317	0	NA	NA	1.40117	0	NA	0.0357043	1.78145	0.0200422	1.34155e-22	Un0544	6713	21845	14279	225
ENSACAG00000003104	0.0489064	0.900801	0.0542921	1.40835e-26	0.0680099	1.28656	0.0528618	2.73189e-30	0.0730316	1.42444	0.0512704	9.439e-31	Un0017	993410	1000514	996962	432
ENSACAG00000003105	0.0230721	1.18916	0.019402	8.02354e-55	0.0389081	1.46059	0.0266386	4.26873e-55	0.0403798	1.48448	0.0272012	3.31202e-56	3	39103968	39116288	39110128	669
ENSACAG00000003106	0.0436448	0.714187	0.0611111	8.90578e-31	0.0402399	0.805143	0.0499786	8.57095e-36	0.0503825	0.834661	0.0603628	1.37563e-33	4	119231297	119256570	119244000	615
ENSACAG00000003107	0.0315105	0.711079	0.0443136	7.11279e-35	0.119017	0.802379	0.148331	3.08895e-22	0.0594281	0.822983	0.0722106	1.33601e-32	3	188801941	188863817	188832879	660
ENSACAG00000003108	0.0129653	0.903782	0.0143456	1.79115e-17	0.0354317	0.949063	0.0373334	4.88583e-16	0.0257721	1.01608	0.0253642	2.82048e-17	f	2088641	2102726	2095680	210
ENSACAG00000003113	0.0702283	0.770844	0.0911057	7.20418e-28	0.0676288	0.928404	0.0728441	2.69363e-33	0.0676038	0.981879	0.0688515	7.15793e-35	1	136434182	136434815	136434000	627
ENSACAG00000003116	0.0344216	0.816092	0.0421786	1.93867e-48	0.0360417	0.985451	0.0365739	2.61495e-55	0.0327881	1.02314	0.0320464	2.74582e-58	5	50528111	50538718	50533400	819
ENSACAG00000003117	0.117271	0.513837	0.228227	5.76537e-22	0.107841	0.568215	0.18979	7.84897e-28	0.134764	0.433439	0.310918	3.36825e-14	Un0723	15611	21115	18363	1179
ENSACAG00000003118	0.0353006	0.967892	0.0364716	1.67094e-115	0.0390739	1.06472	0.0366986	1.17302e-119	0.0377923	1.06682	0.035425	1.39986e-121	6	35847102	35848839	35848000	1734
ENSACAG00000003119	0.0551834	0.670211	0.0823373	5.76886e-13	0.0745052	0.749639	0.0993881	1.00165e-13	0.0623869	0.769124	0.0811142	1.35127e-14	Un0236	156119	172896	164508	291
ENSACAG00000003120	NA	0.260538	0	NA	NA	0.363013	0	NA	0.00275317	0.363614	0.00757168	1.68685e-20	4	130396421	130420115	130408268	468
ENSACAG00000003121	0.0671242	0.787299	0.0852588	2.94579e-49	0.0692768	0.947866	0.0730871	4.32938e-57	0.0719296	1.19865	0.0600089	1.18903e-67	Un0236	199655	225683	212669	1071
ENSACAG00000003122	0.00704937	1.48743	0.00473928	1.09166e-22	0.0141656	1.23957	0.0114278	1.04033e-19	0.0141309	1.16004	0.0121814	5.69476e-19	Un3226	1091	10312	5701.5	192
ENSACAG00000003124	0.018791	0.506084	0.0371302	4.72869e-11	0.0124682	0.583466	0.0213692	2.58819e-13	0.012508	0.751802	0.0166374	3.29455e-16	4	87455778	87501486	87478632	216
ENSACAG00000003125	0.00424881	0.457695	0.00928306	1.17942e-16	0.00853604	0.653451	0.013063	7.44865e-21	0.00852333	0.626207	0.0136111	3.78742e-20	5	50521633	50525779	50523706	309
ENSACAG00000003127	0.0335467	0.830746	0.0403815	3.10216e-59	0.0298082	0.789497	0.037756	2.77491e-59	0.0315447	0.850427	0.0370928	2.54341e-62	Un0114	873700	874705	874202	936
ENSACAG00000003130	0.00723495	0.49689	0.0145605	2.1335e-53	0.00723159	0.5425	0.0133301	1.66558e-57	0.00844366	0.580019	0.0145576	1.05352e-59	Un0114	1003520	1014270	1008895	1059
ENSACAG00000003131	0.0213426	1.17068	0.0182309	5.21903e-47	0.103007	1.22556	0.0840488	2.09431e-30	0.0251948	1.30883	0.0192498	8.67083e-48	Un0610	84698	104349	94523.5	528
ENSACAG00000003132	0.054313	0.531763	0.102138	1.79944e-19	0.0458835	0.537737	0.085327	7.30653e-22	0.0602887	0.545052	0.110611	1.92003e-19	1	43696095	43710813	43703454	573
ENSACAG00000003136	0.161815	1.75976	0.091953	8.19054e-28	0.17638	1.53954	0.114566	1.99419e-24	0.197839	1.59544	0.124002	9.18208e-23	Un0175	5039	12724	8881.5	474
ENSACAG00000003137	0.0369823	0.732721	0.0504726	7.13841e-29	0.0441066	0.912889	0.0483154	3.31575e-34	0.0453355	1.29027	0.0351365	3.17415e-42	4	87515395	87521157	87518276	561
ENSACAG00000003138	0.0610409	0.926743	0.065866	2.33472e-52	0.0670754	0.915409	0.0732737	9.34905e-50	0.0649454	0.940284	0.0690699	1.90168e-52	2	51207805	51218359	51213082	942
ENSACAG00000003140	0.00362805	0.53834	0.00673932	1.26518e-21	0.00725644	0.990102	0.00732898	1.24344e-31	0.00726914	0.778273	0.00934009	4.55778e-27	Un0146	166737	173782	170260	357
ENSACAG00000003141	0.0447964	0.498038	0.0899458	5.32776e-55	0.0869339	0.564686	0.153951	1.08233e-43	0.0485791	0.553843	0.0877129	6.58083e-59	3	38986171	39004618	38995400	1605
ENSACAG00000003142	0.0355763	0.944508	0.0376665	4.31334e-24	0.0501577	0.834827	0.0600816	1.37728e-19	0.0427463	1.18672	0.0360205	3.63453e-28	6	8112543	8115154	8113850	366
ENSACAG00000003143	0.168372	0.67678	0.248784	5.1789e-11	0.178677	0.722276	0.247381	1.97018e-11	0.177043	0.772113	0.229296	1.94317e-12	1	88179177	88191938	88185600	483
ENSACAG00000003144	0.03391	0.419917	0.080754	2.14535e-05	0.133285	0.484059	0.275348	0.00478342	0.0339789	0.559042	0.0607805	7.79645e-07	Un0094	1216643	1232426	1224530	132
ENSACAG00000003145	0.0648368	0.676926	0.0957811	4.38205e-34	0.279181	0.826922	0.337615	5.09126e-12	0.0843929	0.976238	0.086447	9.94766e-43	1	136757429	136788919	136773174	876
ENSACAG00000003149	0.102215	0.834849	0.122435	1.73563e-05	0.152987	0.620377	0.246603	0.00319494	0.292198	0.842962	0.346633	0.00698781	5	55241278	55273424	55257351	120
ENSACAG00000003151	0.0918795	1.25679	0.0731067	2.51058e-16	0.138553	1.25234	0.110635	1.0756e-13	0.129389	0.82675	0.156503	1.66404e-09	Un0723	85	9710	4897.5	249
ENSACAG00000003152	0.16771	1.33008	0.126091	6.05231e-12	0.177447	1.78726	0.0992843	2.79367e-14	0.174311	3.08435	0.0565146	1.63901e-16	Un0983	54943	62377	58660	240
ENSACAG00000003155	0.00674612	0.537707	0.0125461	5.93258e-52	0.0873835	0.58166	0.150231	1.45608e-25	0.518317	1.00512	0.515679	5.39609e-06	6	8137256	8167517	8152390	885
ENSACAG00000003156	0.0731921	0.319056	0.229402	3.32219e-14	0.123959	0.365073	0.339547	5.12012e-10	0.0884747	0.323435	0.273547	2.71642e-12	1	61816598	61882808	61849703	1014
ENSACAG00000003157	0.0775911	1.19409	0.0649791	2.5742e-15	0.0619009	1.0248	0.060403	2.12285e-14	0.0717386	0.981037	0.0731253	8.10439e-14	Un0146	181180	184395	182788	222
ENSACAG00000003159	0.144581	1.1699	0.123585	1.5265e-39	0.170343	1.27928	0.133155	3.3274e-38	0.163735	0.967975	0.169152	1.84403e-29	Un0236	269020	270343	269682	930
ENSACAG00000003160	0.00808459	0.751019	0.0107648	3.60839e-36	0.0203986	0.669429	0.0304717	8.67532e-30	0.00820213	0.808017	0.0101509	1.04842e-37	6	68930547	68943700	68937100	489
ENSACAG00000003161	0.138668	1.0376	0.133643	5.52401e-09	0.188132	NA	NA	9.02643e-13	0.171887	2.62089	0.0655832	3.04514e-12	Un0750	1492	10585	6038.5	204
ENSACAG00000003162	0.0565269	0.601327	0.0940036	9.02897e-44	0.0601784	0.59225	0.10161	5.29048e-42	0.0652301	0.594235	0.109772	6.14223e-40	1	43624742	43636385	43630600	1242
ENSACAG00000003164	0.120758	0.601474	0.20077	2.08476e-10	0.138482	0.954282	0.145116	9.87583e-17	0.128917	0.977188	0.131926	1.96633e-17	1	101210492	101343144	101276818	414
ENSACAG00000003167	NA	0.291819	0	NA	0.0124603	0.406709	0.0306368	5.42772e-25	0.0139311	0.380264	0.0366354	1.59077e-22	Un0001	12661509	12715928	12688700	600
ENSACAG00000003169	0.0453715	0.618923	0.0733071	1.34242e-10	0.026886	0.619683	0.0433867	2.18091e-12	0.0909905	0.597343	0.152325	1.56227e-07	Un0114	1040206	1045766	1042986	219
ENSACAG00000003170	0.0182574	0.890397	0.0205048	8.78594e-64	0.0279412	0.83184	0.0335896	1.43305e-55	0.0263162	0.83184	0.0316361	2.37226e-56	4	119141338	119150508	119145923	840
ENSACAG00000003172	0.0451216	0.477268	0.0945415	0.000224742	0.0686027	0.792666	0.0865467	9.61634e-06	0.0568393	0.78166	0.0727161	4.22535e-06	5	55280369	55283950	55282200	114
ENSACAG00000003173	0.034936	0.542702	0.0643742	1.35705e-22	0.0426563	0.766853	0.0556251	2.85389e-29	0.0479226	0.738314	0.0649081	3.06091e-27	Un0750	16064	26283	21173.5	537
ENSACAG00000003174	0.0805807	0.835197	0.0964811	1.3396e-27	0.0989982	0.980394	0.100978	4.24202e-28	0.082352	0.862343	0.0954979	7.45557e-28	2	51238657	51275874	51257300	651
ENSACAG00000003178	0.160922	1.13862	0.141332	5.20831e-40	0.207488	1.41057	0.147096	3.06717e-40	0.207097	1.41127	0.146745	2.75461e-40	Un0457	120361	152870	136616	1014
ENSACAG00000003184	0.10407	0.864998	0.120313	2.89776e-09	0.131682	1.67166	0.0787732	1.61842e-12	0.149472	1.28809	0.116041	3.51814e-10	1	88163715	88171683	88167699	195
ENSACAG00000003185	0.0813521	0.631732	0.128776	2.42301e-88	0.0877655	0.700351	0.125316	3.28894e-95	0.0934214	0.771944	0.121021	1.05939e-102	3	138069641	138072773	138071207	2919
ENSACAG00000003186	0.0455312	0.858512	0.053035	1.41501e-30	0.113846	1.09457	0.10401	6.8651e-26	0.166364	1.03776	0.16031	6.32229e-19	Un0146	191631	199362	195496	510
ENSACAG00000003187	0.039623	0.645583	0.0613755	1.40206e-18	0.0553844	0.966031	0.0573319	2.65692e-23	0.0396399	1.09663	0.0361471	5.09809e-30	2	82842694	82896094	82869394	420
ENSACAG00000003188	0.143536	NA	NA	3.61046e-13	0.149891	1.57399	0.0952298	7.61312e-07	0.178141	2.8126	0.0633366	7.63697e-08	Un5325	816	2763	1789.5	120
ENSACAG00000003189	0.175881	0.603945	0.29122	3.85968e-10	0.164985	0.640145	0.25773	2.00199e-11	0.165323	0.741289	0.223021	6.29928e-14	3	138089334	138130904	138110119	585
ENSACAG00000003190	0.0864556	0.986005	0.0876827	2.24951e-29	0.0928354	1.04573	0.0887756	1.77995e-30	0.0913833	1.29164	0.07075	1.24885e-36	Un0114	1067494	1071070	1069282	588
ENSACAG00000003195	0.071518	0.644259	0.111008	3.82347e-15	0.0949086	0.715764	0.132598	2.2117e-14	0.0888176	0.730887	0.12152	9.27992e-16	1	61969793	61976690	61973200	378
ENSACAG00000003196	0.0503119	0.26179	0.192185	3.53545e-11	0.0606156	0.312361	0.194056	1.60932e-12	0.0519387	0.305672	0.169917	1.63884e-13	3	145091295	145127269	145109282	801
ENSACAG00000003201	0.042791	0.776331	0.0551196	3.39556e-25	0.0441278	0.740032	0.0596295	1.65297e-24	0.0565848	0.81361	0.0695479	1.27285e-23	Un0029	2380048	2436549	2408300	486
ENSACAG00000003202	0.0534573	0.94219	0.0567373	1.62803e-19	0.0173796	0.860933	0.0201869	1.0173e-23	0.0617735	0.892762	0.0691937	9.50886e-19	Un0718	9017	13403	11210	309
ENSACAG00000003203	0.0706111	0.958971	0.0736322	7.99217e-26	0.0810584	0.974902	0.0831451	3.32671e-25	0.0786903	1.17012	0.0672496	2.32189e-29	4	56753047	56784864	56769000	480
ENSACAG00000003204	NA	0.222408	0	NA	NA	0.248081	0	NA	0.00558102	0.296566	0.0188188	7.14458e-09	5	55315884	55352809	55334300	237
ENSACAG00000003205	0.0793408	0.423713	0.187251	1.41261e-18	0.0962257	0.45887	0.209701	1.566e-17	0.118648	0.460071	0.257891	2.16787e-14	Un0013	2931130	2971828	2951479	927
ENSACAG00000003206	0.0772915	0.911178	0.0848259	6.15305e-215	0.0941152	0.984423	0.0956044	3.24719e-209	0.0940111	1.00915	0.0931585	1.21492e-212	5	118414607	118507635	118461121	4569
ENSACAG00000003208	0.0647064	0.762184	0.0848961	2.23196e-67	0.0709557	0.982998	0.072183	1.62631e-81	0.0765669	1.02998	0.0743384	4.14033e-82	a	1426351	1479725	1453038	1548
ENSACAG00000003209	0.0908097	0.813271	0.11166	2.1866e-19	0.439483	0.928166	0.473496	0.000239501	0.0850469	0.597256	0.142396	9.0969e-15	Un0451	2142	15732	8937	441
ENSACAG00000003211	0.0193248	0.64675	0.0298798	1.25486e-56	0.0674018	0.685908	0.0982665	5.80939e-40	0.0235629	0.793649	0.0296893	1.07302e-64	1	218470157	218571129	218520643	1017
ENSACAG00000003212	0.0894063	0.510322	0.175196	7.24584e-18	0.101514	0.486411	0.208701	1.70834e-14	0.104205	0.60144	0.17326	1.43521e-19	4	17344246	17356287	17350300	768
ENSACAG00000003213	0.018891	0.552037	0.0342205	1.22134e-19	0.0154187	0.527697	0.0292188	1.09868e-19	0.0188549	0.557552	0.0338174	9.3126e-20	1	224243154	224372888	224308021	378
ENSACAG00000003214	0.11537	1.70227	0.0677741	1.02962e-10	0.145782	2.44542	0.0596141	1.25724e-10	0.134763	1.36239	0.0989161	1.38513e-08	Un0457	166881	171829	169355	141
ENSACAG00000003215	0.00980262	0.476696	0.0205637	1.37287e-37	0.00980821	0.543642	0.0180417	5.22014e-44	0.00984294	0.584555	0.0168383	1.19863e-44	Un0065	439920	440919	440420	789
ENSACAG00000003217	0.0415384	0.966649	0.0429715	7.00675e-33	0.0499598	0.897199	0.0556842	4.07086e-29	0.0485672	0.800186	0.0606949	2.27961e-27	3	38851755	38859378	38855600	489
ENSACAG00000003218	0.114435	0.563411	0.20311	7.98964e-07	0.150593	0.57838	0.260371	1.1333e-05	0.165583	0.611072	0.270971	4.07951e-05	1	99939084	99967919	99953500	255
ENSACAG00000003220	0.13606	0.847011	0.160635	5.81402e-16	0.158435	0.977344	0.162107	2.66669e-16	0.158107	0.779952	0.202714	1.61646e-12	Un0750	32843	35257	34050	465
ENSACAG00000003228	0.192128	1.62185	0.118463	3.28561e-27	0.2172	1.12161	0.193651	3.47182e-18	0.209482	0.758307	0.27625	2.55817e-11	Un0756	61279	62842	62060.5	570
ENSACAG00000003235	0.131478	2.23758	0.058759	4.41872e-99	0.143773	2.60396	0.0552134	1.24919e-99	0.136627	1.59619	0.0855957	1.34268e-82	Un1386	4049	36511	20280	1488
ENSACAG00000003236	0.292445	0.952774	0.30694	0.00010799	0.367452	0.834414	0.440371	0.00476	0.357906	1.49626	0.239199	2.85429e-06	Un0065	372473	389115	380794	240
ENSACAG00000003238	0.0792169	0.670769	0.118099	2.29673e-18	0.102025	0.65797	0.155061	7.43272e-16	0.104381	0.762321	0.136925	3.46561e-18	Un0094	1188428	1190063	1189250	492
ENSACAG00000003239	0.00839378	1.23768	0.00678185	1.12792e-52	0.00957433	1.40062	0.0068358	6.34476e-54	0.00837626	1.21642	0.006886	4.93493e-52	Un0273	766907	770560	768734	534
ENSACAG00000003242	0.13228	NA	NA	1.08906e-44	0.139361	2.27341	0.0613003	2.29434e-32	0.128698	1.86771	0.0689072	5.85644e-31	Un0756	70322	75297	72809.5	477
ENSACAG00000003243	0.0704604	0.878056	0.0802458	1.39356e-65	0.0762844	0.85959	0.0887451	3.11856e-61	0.0952358	0.897601	0.1061	5.0589e-57	1	43580703	43599325	43590014	1332
ENSACAG00000003244	0.113238	0.950091	0.119187	5.13689e-18	0.124538	1.14016	0.109229	6.78138e-20	0.133491	1.15248	0.11583	1.59622e-18	Un0094	1164642	1172431	1168540	396
ENSACAG00000003249	0.207447	1.02711	0.201972	8.09723e-13	0.201947	1.13237	0.178341	2.53052e-14	0.210084	1.1639	0.180501	2.60896e-14	3	145082446	145083793	145083000	435
ENSACAG00000003250	0.240996	0.896619	0.268783	1.61327e-07	0.243053	1.09693	0.221575	2.23063e-09	0.238893	1.01856	0.23454	1.19877e-08	Un0114	1169224	1172790	1171007	354
ENSACAG00000003254	0.0129881	0.679384	0.0191175	1.10057e-45	0.016497	0.743846	0.022178	3.55925e-47	0.0182702	0.674218	0.0270984	7.62946e-43	Un0413	46317	313195	179756	738
ENSACAG00000003255	0.0546306	1.53799	0.0355208	1.30306e-38	0.0499352	4.13251	0.0120835	2.34261e-48	0.0529993	1.78696	0.0296589	9.7998e-41	Un0273	735748	749591	742670	459
ENSACAG00000003258	0.133824	0.493733	0.271046	1.56242e-07	0.175012	0.712363	0.245679	5.69484e-10	0.176481	0.644626	0.273773	1.15041e-08	Un0269	128310	151136	139723	483
ENSACAG00000003259	0.0948843	0.625449	0.151706	4.64478e-36	0.112623	0.748075	0.15055	9.88418e-39	0.11916	0.751301	0.158604	1.09111e-37	Un0001	12540972	12572739	12556900	1251
ENSACAG00000003260	0.121776	0.44215	0.275418	2.70528e-05	0.134685	0.562824	0.239302	9.00669e-07	0.158989	0.670892	0.236982	4.3121e-07	Un0094	1151335	1158363	1154849	315
ENSACAG00000003261	0.114593	1.03008	0.111248	1.24595e-41	0.137391	1.12692	0.121917	6.90512e-40	0.142569	1.01192	0.140889	7.42988e-35	4	87618198	87619260	87618729	873
ENSACAG00000003262	0.00219531	0.198605	0.0110536	4.53257e-15	0.00439911	0.249267	0.0176482	1.76341e-17	0.00219735	0.259406	0.00847071	2.89064e-19	2	51368863	51398043	51383453	588
ENSACAG00000003263	0.110612	0.768132	0.144001	1.80525e-66	0.119839	0.880427	0.136115	1.37833e-73	0.113026	0.958757	0.117888	1.22644e-83	3	38824601	38834920	38829800	2022
ENSACAG00000003264	NA	0.632259	0	NA	0.0122354	0.698619	0.0175136	2.11585e-08	0.0122034	0.914408	0.0133457	1.88178e-12	Un0146	203363	209181	206272	111
ENSACAG00000003265	0.0673397	0.85342	0.0789057	9.638e-31	0.126014	0.916651	0.137472	6.81673e-24	0.0665196	0.884289	0.0752238	1.7367e-31	4	17454166	17538801	17496500	600
ENSACAG00000003268	0.0949911	2.02511	0.0469067	2.08254e-11	0.126556	2.68783	0.0470849	1.87945e-10	0.139749	0.829454	0.168483	6.79904e-05	Un2040	8134	17338	12736	126
ENSACAG00000003270	0.00294816	0.105309	0.0279954	7.63222e-07	0.00887166	0.105585	0.0840241	1.57981e-05	0.00590276	0.105585	0.0559055	4.07656e-06	1	210010342	210137881	210074000	462
ENSACAG00000003271	0.11422	0.448207	0.254837	0.000459181	0.126328	0.433492	0.291421	0.00118413	0.165492	0.665677	0.248607	7.87345e-05	Un1330	25926	31729	28827.5	189
ENSACAG00000003274	0.123767	0.589138	0.210081	3.39596e-09	0.174725	0.711073	0.24572	2.29433e-08	0.142188	0.964642	0.1474	1.70843e-14	Un0274	353348	381727	367538	348
ENSACAG00000003281	0.0883718	1.82675	0.0483764	3.51245e-18	0.0883235	1.65087	0.0535011	2.3167e-17	0.0884616	2.04025	0.0433582	5.53643e-19	Un0610	4099	10108	7103.5	234
ENSACAG00000003282	0.0238914	0.329754	0.0724522	4.21372e-48	0.0288088	0.299342	0.0962405	3.93201e-40	0.0272881	0.297349	0.0917714	1.06349e-40	Un0094	1092497	1109476	1100990	1821
ENSACAG00000003283	0.0209926	0.734353	0.0285865	1.57469e-48	0.0226845	0.800155	0.0283502	4.59433e-51	0.0235721	0.708564	0.0332674	3.12831e-45	6	68690135	68690918	68690500	780
ENSACAG00000003284	0.034793	0.769413	0.0452202	3.5413e-61	0.0390925	0.933448	0.0418796	2.18879e-68	0.0453202	1.02143	0.0443692	4.36968e-70	4	56890861	56917700	56904300	1092
ENSACAG00000003285	0.133	0.973482	0.136623	7.34017e-17	0.139899	1.46427	0.0955418	1.29245e-22	0.146026	0.977094	0.149449	1.45634e-15	6	68619462	68633239	68626400	426
ENSACAG00000003286	0.0401711	0.75278	0.0533636	3.81686e-26	0.105806	0.943239	0.112173	4.51704e-21	0.0485925	0.882288	0.0550755	7.25267e-28	Un0094	1063347	1075565	1069456	477
ENSACAG00000003288	0.159198	0.804051	0.197995	4.7334e-43	0.170239	0.870615	0.195539	1.44929e-44	0.174217	0.853871	0.204032	2.99611e-43	1	255719267	255739051	255729159	1764
ENSACAG00000003289	0.0951974	0.685101	0.138954	4.34134e-35	0.0887281	0.81716	0.108581	1.05186e-44	0.149354	0.971309	0.153766	2.3673e-37	Un0065	289528	322819	306174	1086
ENSACAG00000003290	0.0527412	0.742525	0.0710295	7.31719e-15	0.0451117	0.836635	0.0539204	1.06479e-16	0.0503285	0.8337	0.0603676	4.3748e-16	4	87721582	87728034	87724808	273
ENSACAG00000003292	0.126072	0.535665	0.235357	1.64032e-15	0.133423	0.564845	0.236212	1.07863e-15	0.142028	0.572876	0.247921	6.53786e-15	3	27525278	27534745	27530000	852
ENSACAG00000003293	0.27156	1.1261	0.24115	3.21812e-17	0.263017	1.71102	0.153719	2.46168e-26	0.276206	1.15308	0.239537	5.84676e-17	Un0274	342646	343860	343253	699
ENSACAG00000003294	0.071479	0.732004	0.0976484	4.56914e-17	0.0713965	0.872343	0.0818446	5.00835e-20	0.0799717	0.987593	0.0809764	1.85643e-20	4	130445324	130448476	130446900	402
ENSACAG00000003296	0.00554582	0.849385	0.00652921	1.10484e-20	0.0110933	0.984566	0.0112672	2e-21	0.00554056	1.03292	0.00536398	2.57621e-23	Un0274	326033	328872	327452	240
ENSACAG00000003297	0.0983075	1.04971	0.0936517	4.5534e-13	0.0984013	1.29197	0.0761636	3.02315e-15	0.115774	0.931234	0.124323	9.22642e-11	Un0756	77405	78654	78029.5	252
ENSACAG00000003302	0.0030925	0.632318	0.00489073	5.81673e-29	0.00308841	0.741642	0.00416429	1.97894e-32	0.00308879	0.612315	0.00504445	4.79599e-31	1	255741237	255748484	255745000	420
ENSACAG00000003304	0.0443279	0.501698	0.0883558	2.51329e-05	0.0329979	0.501698	0.0657725	7.97215e-06	0.0443279	0.644267	0.0688036	1.28511e-06	2	82971565	82971985	82971775	123
ENSACAG00000003305	0.160136	0.770258	0.2079	5.43166e-08	0.147998	0.855303	0.173036	3.42809e-09	0.186886	0.803988	0.232448	5.37454e-07	Un0114	1494253	1523981	1509117	261
ENSACAG00000003306	0.165754	0.905301	0.183093	1.09714e-14	0.159922	1.07238	0.149128	8.73113e-19	0.17571	0.885683	0.19839	8.65204e-14	Un0013	2885729	2886638	2886180	465
ENSACAG00000003308	0.0986503	0.711627	0.138626	4.34468e-16	0.146752	0.690997	0.212378	5.45086e-11	1.38888	1.95377	0.710873	0.289253	6	68558455	68582172	68570300	447
ENSACAG00000003309	0.0258173	0.699117	0.0369284	1.0727e-14	0.0472785	0.601891	0.0785499	7.9251e-11	0.0153865	0.698322	0.0220335	3.32158e-16	Un0072	488958	516908	502933	252
ENSACAG00000003311	0.0769685	0.618767	0.12439	5.66721e-24	0.0899371	0.639118	0.140721	4.36816e-23	0.075854	0.617062	0.122928	1.61088e-24	Un0072	465710	475359	470534	729
ENSACAG00000003314	0.243537	0.937654	0.25973	5.6992e-17	0.251097	1.23131	0.203927	1.46218e-22	0.250087	1.37664	0.181664	8.57447e-25	1	136800551	136811637	136806094	783
ENSACAG00000003315	0.0245447	0.647717	0.0378942	6.35726e-15	0.0295627	0.607958	0.0486262	1.67127e-13	0.0246525	0.63281	0.0389571	1.02225e-14	5	118049867	118130003	118089935	267
ENSACAG00000003316	0.135605	0.694422	0.195278	2.27177e-07	0.141445	1.0144	0.139437	1.26558e-10	0.153156	0.689529	0.222117	1.25477e-06	4	56927261	56933107	56930184	267
ENSACAG00000003318	0.00702419	0.448734	0.0156533	5.94094e-35	0.00702371	0.405467	0.0173225	6.28035e-32	0.0105654	0.447859	0.023591	5.65594e-33	1	178449918	178646965	178548000	735
ENSACAG00000003319	0.00712535	0.492812	0.0144586	1.62404e-09	0.00712535	0.673812	0.0105747	4.91514e-12	0.00712535	0.673812	0.0105747	4.91514e-12	1	210426698	210435741	210431000	177
ENSACAG00000003321	0.0230423	0.717604	0.0321101	2.23211e-129	0.0250616	0.802913	0.0312134	8.1746e-140	0.0274084	0.857399	0.031967	3.11068e-144	1	43262007	43338705	43300356	2265
ENSACAG00000003323	0.119606	0.8382	0.142694	3.0948e-28	0.12528	0.841899	0.148807	1.97077e-27	0.124553	0.858112	0.145148	9.21233e-28	3	189155640	189157656	189156648	795
ENSACAG00000003327	0.0715352	0.238329	0.300153	0.0174575	0.0829	0.320354	0.258776	0.00479457	0.11162	0.267302	0.417579	0.0871357	2	83060027	83085366	83072700	132
ENSACAG00000003328	0.123795	0.681078	0.181764	3.22371e-28	0.159116	0.835507	0.190442	1.83221e-29	0.15428	0.81417	0.189494	2.80072e-29	1	255751248	255773078	255762163	1062
ENSACAG00000003329	0.0701703	0.810873	0.0865368	1.5965e-12	0.0865032	1.38418	0.0624943	6.40322e-17	0.545378	NA	NA	3.71658e-10	3	100319722	100417964	100368843	255
ENSACAG00000003330	0.065959	0.758117	0.0870037	2.17458e-32	0.0997096	0.689217	0.144671	1.20214e-22	0.105086	0.803991	0.130706	6.91125e-26	Un0013	2839591	2849523	2844557	768
ENSACAG00000003331	0.0531363	1.48046	0.0358917	3.4403e-51	0.11574	1.55601	0.0743828	4.89188e-39	0.0607966	1.38638	0.0438527	6.71451e-48	Un0388	301241	312387	306814	636
ENSACAG00000003333	0.174109	0.738682	0.235702	3.19504e-05	0.166606	0.576547	0.288972	0.000601007	0.158222	0.529137	0.299018	0.00105991	Un5884	2106	3525	2815.5	192
ENSACAG00000003336	0.0567679	0.858654	0.0661126	3.39587e-33	0.0620155	0.972195	0.0637892	3.36421e-36	0.0577806	0.922037	0.0626662	1.24971e-35	4	130492824	130516472	130504648	651
ENSACAG00000003338	0.0993641	0.875483	0.113496	5.72538e-15	0.124015	0.734587	0.168823	1.93476e-11	0.124543	0.866548	0.143723	8.54806e-13	Un0094	1006640	1014198	1010419	348
ENSACAG00000003340	0.213027	1.56857	0.13581	8.11379e-19	0.229264	1.75085	0.130944	1.77353e-18	0.239574	1.38372	0.173138	2.82401e-15	Un0756	88393	92709	90551	408
ENSACAG00000003341	0.020129	0.638792	0.0315111	1.19433e-143	0.0237029	0.655176	0.0361779	5.42127e-140	0.0253703	0.712722	0.0355963	9.4804e-149	3	27508164	27524849	27516500	2658
ENSACAG00000003343	0.0265736	0.87796	0.0302674	2.96806e-72	0.0309478	1.04109	0.0297265	5.85976e-78	0.046956	0.964674	0.0486755	2.29385e-66	Un0422	322059	350998	336528	1068
ENSACAG00000003344	0.0192224	0.651394	0.0295096	1.07723e-15	0.109803	0.925585	0.118631	5.72521e-12	0.100963	0.666576	0.151465	8.36269e-09	Un0296	504419	520034	512226	243
ENSACAG00000003346	0.00408562	1.04961	0.0038925	1.66003e-30	0.00408273	1.17734	0.00346775	1.89689e-32	0.00408562	1.39892	0.00292055	2.70412e-35	Un1373	4549	5206	4877.5	318
ENSACAG00000003347	0.146834	0.837032	0.175423	4.38887e-07	0.13514	0.692701	0.195091	1.57756e-06	0.123815	1.09677	0.11289	5.41221e-10	Un0327	357139	363781	360460	204
ENSACAG00000003350	0.101992	2.11099	0.0483148	6.34311e-18	0.148863	NA	NA	2.14648e-18	0.125146	NA	NA	5.1607e-20	Un0823	84365	87126	85745.5	252
ENSACAG00000003351	0.0969054	1.30132	0.074467	1.93921e-34	0.180888	0.927556	0.195016	4.03211e-17	0.160385	1.18101	0.135804	2.55819e-24	Un0273	715551	720709	718130	576
ENSACAG00000003352	0.0649114	0.581943	0.111542	7.61599e-30	0.186359	0.927234	0.200984	1.52908e-24	0.0664854	0.674275	0.0986027	1.417e-34	Un0611	64721	87477	76099	858
ENSACAG00000003353	0.20433	1.10406	0.185071	4.41836e-14	0.212132	1.01615	0.20876	1.68144e-12	0.218156	1.00192	0.217738	4.84514e-12	Un0072	481650	482382	482016	447
ENSACAG00000003354	NA	0.105873	0	NA	0.0139126	0.260973	0.0533103	6.34404e-06	NA	0.178949	0	NA	4	17710843	17771938	17741400	195
ENSACAG00000003356	0.0667725	0.627626	0.106389	4.81341e-23	0.0734921	0.65949	0.111438	3.99482e-23	0.0800227	0.669044	0.119608	2.69011e-22	1	216170950	216235528	216203239	633
ENSACAG00000003360	0.0139203	0.410085	0.033945	8.88904e-08	0.0139203	0.457002	0.0304601	1.57258e-08	0.0209278	0.415132	0.0504125	3.37198e-07	Un0127	229217	246061	237639	183
ENSACAG00000003361	0.0826185	0.508635	0.162432	1.25306e-10	0.0768102	0.592408	0.129658	1.95213e-12	0.100373	0.643866	0.155891	1.00806e-11	4	130522740	130553135	130538000	423
ENSACAG00000003363	0.0990247	1.78452	0.0554908	2.28925e-14	0.127381	2.66798	0.0477445	1.72232e-15	0.0767905	1.38788	0.0553294	2.34351e-15	Un0823	101233	109988	105610	195
ENSACAG00000003367	0.117556	0.818345	0.143651	1.02299e-43	0.187718	0.790329	0.237519	1.36268e-27	0.123568	0.808452	0.152845	1.89221e-41	3	38777723	38798181	38787952	1239
ENSACAG00000003369	0.0318608	0.645705	0.0493426	4.95165e-57	0.0256344	0.6974	0.036757	7.41682e-65	0.0293767	0.678648	0.0432871	1.3975e-62	Un0013	2821400	2837107	2829250	1113
ENSACAG00000003371	0.155231	1.06681	0.145509	1.21644e-25	0.174878	1.40485	0.124482	5.48081e-30	0.130762	1.08177	0.120878	4.1066e-29	a	1391117	1393520	1392320	660
ENSACAG00000003374	0.10826	0.719032	0.150564	2.45652e-40	0.119885	0.710822	0.168657	7.47254e-37	0.1247	0.88694	0.140596	1.49845e-45	2	51631066	51814954	51723010	1299
ENSACAG00000003375	0.00923571	0.59446	0.0155363	4.15825e-114	0.0226183	0.680206	0.0332521	4.08732e-109	0.0207185	0.705432	0.0293699	3.34087e-115	3	99935605	99957580	99946600	1971
ENSACAG00000003377	0.146414	0.81478	0.179697	2.52192e-08	0.222789	1.3288	0.167661	8.07027e-10	0.19533	1.15435	0.169213	1.37898e-09	4	119092067	119103547	119097807	252
ENSACAG00000003378	0.116706	2.64027	0.0442025	8.33979e-62	0.137794	2.28032	0.0604274	2.2005e-55	0.130279	2.53266	0.0514397	1.16263e-58	Un1109	37735	46293	42014	834
ENSACAG00000003382	0.0684571	0.780315	0.08773	7.02757e-27	0.072605	0.879776	0.0825266	8.18767e-29	0.0689927	0.932517	0.0739855	1.70298e-30	Un0094	990298	997204	993751	573
ENSACAG00000003386	0.00551562	0.698057	0.00790138	1.37211e-50	0.00551305	0.781207	0.0070571	7.43346e-55	0.00551346	0.763887	0.00721764	5.38843e-54	5	117947335	117960725	117954030	711
ENSACAG00000003389	0.00203605	0.739985	0.00275148	1.74308e-95	0.00203708	0.787652	0.00258626	9.04369e-100	0.00101838	0.805888	0.00126367	3.43987e-103	Un1109	48386	53500	50943	1260
ENSACAG00000003390	0.118069	0.84775	0.139273	1.76927e-39	0.137609	0.918007	0.1499	2.59175e-38	0.144445	1.05675	0.136688	1.70309e-42	4	56947531	56948737	56948134	1089
ENSACAG00000003391	0.0588746	0.787192	0.0747907	1.66032e-36	0.149192	0.844497	0.176663	2.47644e-23	0.14658	0.766344	0.191272	2.78876e-20	Un0274	207081	233142	220112	702
ENSACAG00000003392	0.0850192	0.66032	0.128755	9.73621e-46	0.0952635	0.76552	0.124443	7.29899e-50	0.109533	0.822858	0.133113	2.94425e-50	Un0127	299536	395655	347596	1464
ENSACAG00000003394	0.0397934	0.648655	0.0613475	8.85683e-13	0.230878	NA	NA	2.95226e-24	0.0396287	0.545685	0.0726221	7.99116e-11	1	216290500	216297125	216294000	264
ENSACAG00000003396	0.111767	0.851576	0.131247	5.56432e-23	0.0404646	0.611767	0.0661438	5.87868e-27	0.0360317	0.634729	0.056767	5.58939e-29	5	50340628	50364602	50352615	621
ENSACAG00000003397	0.0869523	0.660434	0.131659	4.26705e-46	0.0909954	0.855883	0.106318	1.006e-59	0.113521	0.8141	0.139444	1.39877e-49	Un0013	2743007	2779098	2761050	1464
ENSACAG00000003400	0.0940684	1.00073	0.094	3.82966e-08	0.0773468	1.79534	0.043082	4.71635e-13	0.110666	1.5396	0.0718797	1.17401e-10	Un0146	256438	259579	258008	138
ENSACAG00000003401	0.0233797	0.335179	0.0697528	6.3952e-14	0.0275589	0.376089	0.0732775	3.23556e-14	0.0726898	0.565938	0.128441	5.79451e-15	Un0001	12379602	12472522	12426062	471
ENSACAG00000003403	0.0491901	0.79345	0.0619952	1.75762e-17	0.0715433	1.31265	0.0545028	4.48721e-22	0.0851034	1.43407	0.0593438	1.15867e-21	Un0146	269523	272525	271024	312
ENSACAG00000003405	0.0569074	0.70901	0.0802632	2.80353e-16	0.0587347	0.673685	0.0871842	1.17242e-14	0.0770367	0.736977	0.104531	1.49073e-14	4	130658665	130660786	130660000	342
ENSACAG00000003408	0.106287	1.17093	0.0907716	1.83967e-07	0.149793	1.1185	0.133923	4.20372e-06	0.472265	NA	NA	5.02398e-05	Un0072	383110	416548	399829	138
ENSACAG00000003410	0.0719458	NA	NA	2.77806e-43	0.0905236	NA	NA	3.3817e-41	0.0883035	NA	NA	1.36901e-39	Un0420	266247	277322	271784	348
ENSACAG00000003412	0.173755	0.491811	0.353297	0.0191118	0.146709	1.11612	0.131445	5.0911e-07	0.144089	0.693108	0.207889	0.000204883	Un0289	607713	608533	608123	153
ENSACAG00000003414	0.0524739	0.592551	0.088556	8.12206e-29	0.0624967	0.606172	0.103101	8.89112e-27	0.0608688	0.683376	0.0890708	5.95433e-31	Un0065	177788	214168	195978	783
ENSACAG00000003415	0.138123	0.852056	0.162106	2.4851e-26	0.186691	0.914082	0.204239	1.16758e-21	0.143826	0.897207	0.160305	7.21859e-27	Un0289	612314	621070	616692	789
ENSACAG00000003418	0.0451793	0.872693	0.05177	1.15951e-17	0.0545747	0.823481	0.0662732	8.30981e-16	0.0638183	0.944536	0.0675657	1.41039e-16	1	255791165	255792211	255791688	294
ENSACAG00000003423	0.150818	0.772772	0.195164	1.37268e-21	0.166511	0.893465	0.186365	1.12423e-23	0.16799	0.888413	0.18909	2.75399e-23	1	211818612	211848589	211834000	807
ENSACAG00000003424	0.0894387	0.430496	0.207757	8.12862e-26	0.0920986	0.484989	0.189898	1.11581e-30	0.0927762	0.487662	0.190247	1.81472e-30	Un0422	276262	319055	297658	1404
ENSACAG00000003426	0.0506984	0.408501	0.124108	1.06037e-16	0.0517675	0.49053	0.105534	6.8622e-20	0.05183	0.599598	0.0864412	8.26278e-25	Un0127	469570	484975	477272	627
ENSACAG00000003427	0.0505641	0.520753	0.097098	7.53875e-11	0.0505641	0.651858	0.0775691	1.45386e-13	0.0572084	0.664843	0.086048	9.6013e-14	Un0001	12288410	12296607	12292500	312
ENSACAG00000003428	0.0246259	1.22874	0.0200415	7.85474e-33	0.0354613	1.34891	0.0262888	3.55602e-32	0.0977066	1.38605	0.0704928	1.84651e-23	Un0094	893158	914513	903836	375
ENSACAG00000003429	0.032245	0.651984	0.0494567	1.20212e-37	0.0448138	0.681628	0.0657453	1.03787e-35	0.109531	0.80506	0.136053	9.57429e-27	3	38688043	38735592	38711800	720
ENSACAG00000003430	0.0946959	1.02403	0.0924737	1.77045e-31	0.0972445	1.19341	0.0814844	2.24626e-35	0.100795	1.01456	0.0993491	4.92885e-30	Un0086	415614	441352	428483	681
ENSACAG00000003431	0.110446	1.03999	0.1062	7.3667e-41	1.15957	NA	NA	2.31186e-08	0.205791	1.36747	0.150491	5.20089e-33	Un0302	175679	222867	199273	867
ENSACAG00000003432	0.0609491	0.83205	0.0732517	1.62028e-20	0.0790225	1.00255	0.0788216	1.46406e-21	0.0829366	0.901182	0.0920309	2.30701e-19	1	216393315	216425780	216410000	399
ENSACAG00000003433	0.0418894	0.671134	0.0624158	3.04142e-38	0.0389093	0.718366	0.0541636	3.13017e-42	0.112611	0.906628	0.124209	1.11207e-32	2	51953323	51996427	51974875	783
ENSACAG00000003434	0.172837	NA	NA	3.29963e-25	0.24645	NA	NA	1.65535e-20	0.217849	2.84341	0.0766154	3.60572e-20	Un0420	261633	266110	263872	351
ENSACAG00000003435	0.0983971	0.684235	0.143806	2.79107e-16	0.127603	0.657973	0.193934	5.01972e-13	0.116508	0.587993	0.198145	8.56495e-12	4	130686883	130694849	130690866	486
ENSACAG00000003438	0.145509	0.886949	0.164055	1.48998e-39	0.143521	0.87455	0.164109	8.3e-40	0.131587	0.944774	0.139279	2.80025e-46	Un0451	38675	46203	42439	1194
ENSACAG00000003440	0.0258022	0.429483	0.0600774	5.70519e-10	0.0170726	0.302289	0.0564775	2.06542e-07	0.0170726	0.448644	0.0380537	1.05783e-10	4	18683549	18698365	18690957	234
ENSACAG00000003442	0.109937	0.868825	0.126535	2.15841e-43	0.130731	0.911174	0.143475	1.45222e-40	0.117709	0.913559	0.128847	9.25277e-44	5	50267735	50300024	50283900	1164
ENSACAG00000003443	0.0146018	0.880238	0.0165885	1.50661e-34	0.0234536	0.830656	0.028235	1.83747e-30	0.0175388	0.825605	0.0212436	8.30466e-34	Un0072	330910	332658	331784	450
ENSACAG00000003444	NA	0.981373	0	NA	0.00435982	1.07293	0.00406348	4.62855e-55	0.0500447	1.32018	0.0379076	7.53957e-44	Un0065	110034	122345	116190	588
ENSACAG00000003445	NA	0.436648	0	NA	NA	0.628499	0	NA	NA	0.436648	0	NA	Un0420	249413	260071	254742	186
ENSACAG00000003449	0.0356904	0.278578	0.128116	9.9299e-06	0.0356425	0.304715	0.11697	2.59606e-06	0.0304988	0.278136	0.109654	4.09862e-06	Un0001	12207544	12284854	12246199	261
ENSACAG00000003452	0.10255	0.731834	0.140127	2.40898e-26	0.0988604	0.708225	0.139589	4.22571e-26	0.104071	0.744149	0.139853	2.32398e-26	1	211874886	211895762	211885324	762
ENSACAG00000003453	0.0505399	0.79596	0.0634955	3.00202e-25	0.0504627	0.97463	0.0517763	8.21376e-30	0.0675437	0.958667	0.0704558	4.71161e-27	Un0519	1619	4185	2902	462
ENSACAG00000003455	0.0247679	0.664317	0.0372833	1.00584e-54	0.0268369	0.808015	0.0332134	2.4174e-62	0.025884	0.809036	0.0319936	1.57932e-63	Un0422	225715	264359	245037	999
ENSACAG00000003459	0.0574039	0.982913	0.0584018	2.0238e-111	0.059344	1.00718	0.0589208	6.76988e-112	0.0593652	1.0593	0.0560419	1.63094e-116	Un0072	274158	285253	279706	1950
ENSACAG00000003461	0.105685	0.37047	0.285274	5.00071e-06	0.11422	0.498085	0.229319	2.16749e-08	0.113873	0.436738	0.260735	9.58702e-07	1	216444767	216473495	216459131	426
ENSACAG00000003462	0.0805174	0.577644	0.139389	2.64442e-16	0.0782564	0.637124	0.122828	9.67052e-19	0.0591807	0.623649	0.0948943	6.441e-20	1	216491629	216542934	216517000	510
ENSACAG00000003464	0.0852551	0.719142	0.118551	2.59078e-19	0.143466	0.72146	0.198856	4.00757e-14	0.143853	0.814583	0.176598	1.25684e-15	4	130884199	130884781	130884490	516
ENSACAG00000003465	0.137147	2.14782	0.0638541	1.7093e-108	0.137019	1.51681	0.0903337	1.34587e-90	0.134827	1.60183	0.0841707	2.47827e-95	Un0718	121518	124272	122895	1728
ENSACAG00000003467	0.0312836	0.74354	0.0420739	1.2118e-66	0.0657724	0.853474	0.0770643	1.79417e-57	0.0408322	0.665718	0.0613355	3.39708e-55	Un0269	590322	608045	599184	1164
ENSACAG00000003468	0.0441698	0.500139	0.0883151	3.03659e-20	0.0418863	0.667047	0.0627935	1.27492e-27	0.0722224	0.640409	0.112775	1.31155e-20	1	216756909	216800432	216779000	582
ENSACAG00000003470	0.033673	0.954408	0.0352816	1.9931e-18	0.0386421	1.34428	0.0287456	3.97246e-22	0.0388001	0.982417	0.0394945	2.665e-18	a	1194571	1224719	1209645	270
ENSACAG00000003471	0.0567254	0.626922	0.0904824	4.16125e-19	0.059155	0.698495	0.0846892	1.06627e-20	0.0548518	0.753471	0.0727988	1.25486e-23	4	131089169	131092129	131090649	477
ENSACAG00000003473	0.0280037	0.367134	0.0762765	4.61119e-10	0.0260369	0.496304	0.0524616	1.31673e-14	0.0280037	0.635417	0.0440714	4.84707e-17	5	50156762	50209754	50183258	327
ENSACAG00000003475	0.100583	0.749463	0.134207	2.03108e-34	0.105188	0.793764	0.132518	1.4717e-35	0.103416	0.805227	0.128431	2.1442e-36	3	27489231	27496336	27492800	963
ENSACAG00000003476	0.030897	1.15573	0.0267336	6.71989e-22	0.0388327	1.4724	0.0263737	1.1948e-24	0.0335073	1.1249	0.0297869	6.00732e-22	Un0451	46357	49387	47872	261
ENSACAG00000003477	0.0332163	0.499816	0.066457	1.3176e-17	0.0677789	0.570145	0.11888	9.74927e-15	0.0532274	0.503065	0.105806	1.47118e-14	5	50106091	50132527	50119309	468
ENSACAG00000003478	0.115551	0.974847	0.118533	1.97544e-32	0.123224	0.980157	0.125719	4.88575e-31	0.126241	1.13105	0.111614	2.1018e-35	Un0388	215965	261394	238680	753
ENSACAG00000003480	0.0611544	1.00065	0.0611144	8.09636e-35	0.0737334	0.903667	0.0815935	7.14334e-30	0.0908851	0.883671	0.102849	2.36429e-26	a	1090404	1142778	1116591	585
ENSACAG00000003481	0.0885803	0.581153	0.152422	9.91981e-15	0.110956	0.681952	0.162703	8.94439e-15	0.101874	0.701917	0.145137	3.31918e-16	3	99831789	99839054	99835400	492
ENSACAG00000003482	0.0721401	0.615938	0.117122	1.12556e-32	0.0820909	0.698711	0.117489	2.04211e-35	0.0731412	0.814031	0.0898507	3.52847e-43	3	99685209	99744362	99714800	945
ENSACAG00000003483	0.0897701	0.794153	0.113039	3.12453e-62	0.0923982	0.767545	0.120381	6.00605e-59	0.0972639	0.765368	0.127081	1.70673e-56	Un0072	53723	67781	60752	1668
ENSACAG00000003484	0.00671493	0.590491	0.0113718	7.02584e-35	0.00894587	0.671777	0.0133167	2.52894e-37	0.247104	1.06676	0.23164	7.90249e-14	Un0086	450789	484996	467892	576
ENSACAG00000003487	0.0702797	0.748317	0.093917	1.55181e-08	0.07992	0.823526	0.0970462	9.45423e-09	0.0705013	0.611473	0.115298	3.61602e-07	a	477485	479306	478396	153
ENSACAG00000003489	0.165015	1.03263	0.1598	3.44841e-13	0.177532	1.17729	0.150797	7.75335e-15	0.289741	1.38023	0.209922	8.69613e-11	Un0451	50541	53248	51894.5	366
ENSACAG00000003490	0.0629557	0.581691	0.108229	5.70533e-11	0.0693782	0.569515	0.12182	1.10811e-10	0.0607409	0.601924	0.100911	4.50787e-12	3	27439162	27452071	27445600	315
ENSACAG00000003497	0.13919	NA	NA	6.32433e-13	0.113826	NA	NA	8.16543e-14	0.157166	NA	NA	9.2616e-15	Un0451	55814	67336	61575	138
ENSACAG00000003498	0.211771	0.907546	0.233345	3.57263e-15	0.226649	0.858869	0.263893	4.601e-13	0.237697	0.852922	0.278685	4.55001e-12	4	87758642	87771335	87765000	630
ENSACAG00000003500	0.131289	0.415265	0.316158	0.00999379	0.14369	0.484975	0.296282	0.00536291	0.169734	0.83669	0.202864	0.000256284	a	355096	361746	358421	123
ENSACAG00000003501	0.0984413	1.40837	0.0698976	1.70745e-32	0.197268	2.44849	0.0805673	1.25203e-28	0.117932	2.30108	0.0512508	2.58569e-38	Un0756	107245	114663	110954	513
ENSACAG00000003503	0.0843663	0.623898	0.135224	7.10824e-12	0.0795554	0.612339	0.129921	6.32697e-12	0.0778188	0.76978	0.101092	8.68573e-15	Un0222	141651	166660	154156	336
ENSACAG00000003504	0.081178	1.05967	0.076607	6.28097e-11	0.0706986	0.750214	0.094238	1.29944e-08	0.0883489	0.622373	0.141955	1.5322e-06	5	50022856	50249880	50136368	165
ENSACAG00000003505	0.218285	1.41882	0.15385	2.19355e-23	0.237135	1.50149	0.157934	2.7185e-23	0.256184	1.22821	0.208583	1.00623e-17	a	8426	50603	29514.5	615
ENSACAG00000003509	0.0516093	0.637644	0.0809375	3.48782e-42	0.0594899	0.674637	0.0881806	1.42235e-41	0.0627134	0.738956	0.0848675	1.0845e-43	4	131268853	131318455	131293654	1011
ENSACAG00000003510	0.105985	0.897134	0.118137	3.08562e-25	0.11292	0.866086	0.13038	3.51576e-23	0.115306	0.927578	0.124309	1.91651e-25	Un0013	2728245	2733784	2731010	600
ENSACAG00000003515	0.0258226	0.595229	0.0433827	0.000924666	0.816889	NA	NA	0.010682	0.0525661	0.983125	0.0534684	0.000157563	Un0422	204676	219897	212286	54
ENSACAG00000003518	0.0601765	1.93195	0.0311481	2.48246e-10	0.0600254	2.01466	0.0297943	1.97658e-10	0.0603982	1.82779	0.0330444	3.43715e-10	Un0889	59279	69328	64303.5	111
ENSACAG00000003520	0.0363117	0.888129	0.0408856	3.3548e-57	0.0416258	0.828083	0.0502676	2.1479e-51	0.120798	0.950719	0.12706	4.95516e-35	Un0127	597464	614934	606199	927
ENSACAG00000003522	0.0944601	1.59098	0.0593723	1.61081e-15	0.113691	1.62387	0.0700125	1.70832e-15	0.128111	1.65725	0.0773036	6.74867e-15	Un0451	83084	97303	90193.5	219
ENSACAG00000003524	0.0118353	0.821691	0.0144035	5.60161e-22	0.0165876	1.19961	0.0138274	1.83626e-26	0.0214832	0.911007	0.0235818	1.25959e-21	3	38493854	38520914	38507384	276
ENSACAG00000003525	0.0649451	0.950865	0.0683011	1.07665e-22	0.0495336	1.03911	0.0476694	1.22729e-26	0.059267	1.08327	0.0547111	2.58499e-25	Un0072	8849	12342	10595.5	375
ENSACAG00000003527	0.0494837	0.5209	0.0949966	4.21453e-22	0.0603174	0.764245	0.0789242	5.02009e-29	0.0740491	0.770665	0.0960847	3.94274e-26	Un0064	310407	317160	313784	585
ENSACAG00000003531	0.0170281	0.683145	0.024926	9.07934e-109	0.0209112	0.75584	0.0276661	1.14034e-112	0.0229989	0.85809	0.0268024	8.86138e-122	1	41836582	41890300	41863441	1860
ENSACAG00000003534	0.0425594	0.637986	0.0667089	4.16343e-16	0.0326389	1.09974	0.0296788	1.60161e-27	0.0327094	1.13757	0.0287537	3.42999e-28	Un0327	219634	228659	224146	345
ENSACAG00000003538	0.0537651	0.705535	0.0762047	5.306e-14	0.0640227	0.667155	0.0959637	2.29825e-12	0.0614694	0.684026	0.0898642	1.85189e-13	4	57071926	57080042	57075984	282
ENSACAG00000003540	0.135239	0.879918	0.153695	4.15201e-16	0.117511	1.3202	0.0890095	1.3298e-24	0.130824	1.60497	0.0815118	2.6819e-26	3	99651241	99651709	99651475	453
ENSACAG00000003545	0.0495059	0.851002	0.0581736	1.77154e-19	0.08171	0.849015	0.096241	8.12414e-16	0.0660861	1.07891	0.0612524	2.39121e-21	Un0343	269481	449929	359705	348
ENSACAG00000003548	0.111078	0.973465	0.114106	1.85823e-24	0.134531	1.0203	0.131854	1.9769e-23	0.126581	1.11023	0.114013	1.1153e-25	Un0519	42797	49687	46242	525
ENSACAG00000003550	0.0303559	0.461536	0.0657715	7.10831e-18	0.0374061	0.52427	0.071349	1.66404e-19	0.0431516	0.540281	0.0798687	4.5577e-19	3	99465049	99533089	99499069	480
ENSACAG00000003552	0.0191974	0.61548	0.0311909	3.94205e-82	0.0222189	0.703291	0.0315928	2.06302e-88	0.0235377	0.71899	0.0327372	8.69127e-90	4	18793094	18794705	18793900	1536
ENSACAG00000003553	0.26994	0.706303	0.382187	5.78606e-06	0.327555	0.666464	0.491481	0.000641985	0.31221	0.822878	0.379413	6.68474e-06	4	18888268	18908700	18898484	435
ENSACAG00000003555	0.0573175	0.724393	0.0791249	2.01243e-09	0.0575837	0.767442	0.0750334	5.57185e-10	0.0709874	0.838749	0.0846349	6.79219e-10	Un0110	83043	95539	89291	204
ENSACAG00000003556	0.0142419	0.192488	0.0739888	0.000478415	0.0213851	0.261955	0.0816365	5.30173e-06	0.0142419	0.192488	0.0739888	0.000478415	Un0094	835324	840735	838030	183
ENSACAG00000003557	0.131924	0.668567	0.197324	2.03432e-12	0.135033	0.931248	0.145002	4.88935e-18	0.144286	0.878809	0.164184	3.95165e-16	Un0222	185740	200110	192925	492
ENSACAG00000003558	0.0415331	0.497471	0.0834885	9.07624e-06	0.0414575	0.501255	0.0827075	8.44911e-06	0.0521901	0.630681	0.082752	1.39402e-06	Un0110	235511	257017	246264	132
ENSACAG00000003560	0.00780164	0.711928	0.0109585	1.62319e-12	0.00780164	0.711928	0.0109585	1.62319e-12	0.00780164	0.711928	0.0109585	1.62319e-12	Un0094	827240	829322	828281	168
ENSACAG00000003561	0.00941686	1.72904	0.00544628	2.27722e-15	NA	2.21254	0	NA	NA	1.43747	0	NA	Un0519	154095	160077	157086	135
ENSACAG00000003563	0.14194	2.53392	0.056016	5.29512e-15	0.137969	1.09645	0.125832	2.84452e-10	0.174779	1.28133	0.136405	1.67953e-09	Un0274	168779	180728	174754	198
ENSACAG00000003566	0.122127	0.634647	0.192432	2.78156e-11	0.132116	0.764826	0.17274	2.5971e-13	0.142247	0.794197	0.179108	3.8535e-13	6	46970746	47001035	46985900	453
ENSACAG00000003568	0.0893258	1.17267	0.0761731	1.65574e-23	0.124536	1.20625	0.103242	2.38782e-20	0.0929863	1.35577	0.0685857	1.7631e-25	Un0519	184548	191344	187946	393
ENSACAG00000003573	0.152838	0.989666	0.154434	1.61796e-61	0.167127	0.956357	0.174754	2.84831e-54	0.177418	1.01123	0.175447	3.34513e-55	Un0029	2544543	2589563	2567053	1803
ENSACAG00000003574	0.162383	1.04568	0.15529	3.56307e-33	0.169335	1.38705	0.122082	1.3822e-41	0.179331	1.72087	0.104209	7.80498e-47	Un0457	284898	298316	291607	927
ENSACAG00000003577	0.0580071	0.609711	0.0951386	2.1119e-06	0.0611249	0.665018	0.0919147	3.85229e-07	0.0580424	0.693517	0.0836929	3.92834e-07	Un0091	1651	57379	29515	144
ENSACAG00000003578	0.0463159	2.0717	0.0223565	5e-42	0.0591536	1.61242	0.0366861	4.68019e-35	0.0628057	1.36303	0.0460779	7.95129e-32	2	52082414	52095220	52088817	480
ENSACAG00000003580	0.10029	0.655605	0.152973	9.93413e-38	0.107922	0.876184	0.123173	7.15855e-51	0.113932	0.779986	0.14607	1.72153e-42	Un0222	211973	272654	242314	1314
ENSACAG00000003581	0.141529	1.0058	0.140712	9.55446e-28	0.154363	1.17997	0.130819	8.04753e-31	0.155598	1.24521	0.124958	9.3857e-32	Un0065	76168	84392	80280	777
ENSACAG00000003583	0.0472927	0.763765	0.0619205	4.33655e-57	0.0523163	0.743162	0.0703969	9.59144e-55	0.057546	0.889996	0.0646587	6.27259e-61	3	38473853	38486439	38480146	1116
ENSACAG00000003584	0.0719732	0.403741	0.178266	9.91305e-10	0.0739782	0.46421	0.159364	4.39128e-11	0.0694695	0.450845	0.154087	1.35167e-11	1	43186595	43193010	43189800	456
ENSACAG00000003586	0.542816	1.19832	0.45298	0.00888211	1.40973	1.34006	1.05199	0.857534	0.846974	1.10155	0.768892	0.389609	Un0420	190695	201302	195998	177
ENSACAG00000003589	0.0132665	0.620498	0.0213803	2.81971e-16	0.0132542	0.665787	0.0199075	3.57141e-17	0.0132747	0.748897	0.0177257	8.10072e-19	1	256004908	256012925	256009000	285
ENSACAG00000003591	0.183368	1.3241	0.138485	1.58221e-15	0.157145	1.91344	0.0821269	2.30339e-21	0.159074	2.10801	0.0754619	1.26991e-22	Un0420	170449	175370	172910	372
ENSACAG00000003592	0.0539783	0.763517	0.070697	1.00708e-51	0.0592634	0.773914	0.0765761	1.95097e-51	0.0628861	0.826552	0.0760825	7.24018e-53	5	117776968	117784692	117780830	1044
ENSACAG00000003593	0.0759239	0.9622	0.0789066	6.60999e-23	0.0980261	1.37239	0.0714275	9.55565e-27	0.112913	1.11414	0.101345	5.43605e-22	4	131354170	131387660	131370915	456
ENSACAG00000003599	0.0489091	0.700303	0.0698399	1.67743e-52	0.0489091	0.888697	0.0550346	4.43449e-65	0.0482422	0.850927	0.0566937	2.88811e-62	Un0127	620625	646436	633530	1122
ENSACAG00000003601	0.0580575	0.773526	0.0750556	3.15428e-51	0.0666037	0.828381	0.0804023	3.71556e-52	0.0766952	0.890687	0.086108	7.38603e-52	Un0065	70235	71351	70793	1092
ENSACAG00000003603	0.0755065	0.861519	0.0876434	3.48357e-29	0.104757	0.900052	0.116389	2.53029e-25	0.0989312	0.814991	0.121389	2.11261e-23	Un0065	2165	57291	29728	594
ENSACAG00000003607	0.111227	0.63661	0.174718	3.21518e-18	0.0697942	0.559511	0.124741	3.53855e-21	0.0607289	0.625346	0.0971125	8.647e-26	Un0026	2263017	2305363	2284190	645
ENSACAG00000003611	0.126443	0.807405	0.156605	8.57239e-11	0.159009	1.38646	0.114687	6.66517e-15	0.148478	0.800039	0.185588	2.77214e-09	Un0296	613294	618311	615802	288
ENSACAG00000003613	0.0112497	0.529979	0.0212267	8.56093e-31	0.0135095	0.578963	0.023334	3.0737e-32	0.0112453	0.700142	0.0160615	1.09563e-38	Un0110	714677	743222	728950	582
ENSACAG00000003615	0.0723549	1.1886	0.060874	7.8439e-16	0.0671325	1.47451	0.0455288	9.36953e-19	0.073467	1.9874	0.0369664	9.32402e-21	Un2655	2696	13394	8045	231
ENSACAG00000003618	0.0478503	0.438427	0.109141	2.00822e-28	0.0598374	0.508541	0.117665	1.355e-30	0.049174	0.488266	0.100712	9.27786e-32	5	117640394	117704162	117672278	996
ENSACAG00000003619	0.0256444	1.24611	0.0205796	1.25143e-30	0.0297141	0.794729	0.0373889	4.80356e-22	0.049826	1.31029	0.0380266	9.06353e-27	Un0146	363575	389260	376418	336
ENSACAG00000003620	0.00371424	0.485628	0.00764832	3.03699e-65	0.122432	NA	NA	9.82255e-126	0.0193823	0.665215	0.0291369	1.70841e-67	1	256023057	256061305	256042181	1209
ENSACAG00000003625	0.21613	0.937624	0.230509	1.77294e-18	0.0423452	0.971778	0.043575	6.50105e-51	0.0391535	0.836379	0.0468131	2.79335e-46	Un0759	90704	99532	95118	834
ENSACAG00000003626	0.0883862	1.63812	0.053956	6.62272e-18	0.100817	1.11801	0.0901751	2.8515e-13	0.0792241	1.05312	0.0752283	8.18985e-15	Un0273	547373	551151	549262	237
ENSACAG00000003628	0.0348018	0.64217	0.0541941	1.44261e-97	0.0328405	0.721973	0.0454872	1.79065e-110	0.0596142	0.715438	0.0833254	2.16279e-87	1	218291481	218328005	218309743	2169
ENSACAG00000003631	0.0407267	0.749101	0.0543675	1.39151e-39	0.0466513	1.0286	0.045354	6.29467e-48	0.0496108	1.05448	0.0470475	2.50083e-48	4	156397472	156449646	156423559	741
ENSACAG00000003634	0.0815949	0.585753	0.139299	3.0325e-144	0.0898806	0.634951	0.141555	3.62504e-149	0.0930699	0.654814	0.142132	1.34743e-151	5	27273544	27311661	27292600	5181
ENSACAG00000003637	0.109125	0.732333	0.14901	7.29277e-22	0.10458	0.895319	0.116807	9.96046e-28	0.107709	0.887371	0.12138	1.84142e-27	4	49238391	49257587	49247989	696
ENSACAG00000003638	0.108108	1.01309	0.106711	8.41492e-27	0.136745	1.58033	0.0865296	3.59244e-33	0.108051	1.26445	0.0854528	1.04842e-30	Un0457	307448	332378	319913	558
ENSACAG00000003639	0.048252	0.66076	0.0730249	3.08023e-71	0.0529489	0.720933	0.073445	3.37041e-74	0.0761657	0.654734	0.116331	4.47282e-56	1	217192273	217194085	217193179	1650
ENSACAG00000003640	0.060689	0.5408	0.112221	3.04865e-06	0.0747831	0.667904	0.111967	1.57607e-07	0.156157	0.735325	0.212365	6.27454e-05	2	52119608	52147739	52133700	159
ENSACAG00000003643	0.00685059	0.673885	0.0101658	8.13642e-25	0.00341501	0.676824	0.00504565	4.44292e-26	0.00341298	0.780545	0.00437257	8.76974e-29	Un0146	398160	411121	404640	372
ENSACAG00000003644	0.136779	1.45524	0.093991	1.22829e-07	0.142628	1.58382	0.0900532	2.10438e-08	0.136281	1.51331	0.0900552	9.04895e-08	Un0110	1228520	1236760	1232640	132
ENSACAG00000003648	0.0108276	0.232846	0.046501	0.000783881	0.0108276	0.329873	0.0328234	4.14549e-05	0.0108276	0.38354	0.0282306	8.86681e-06	4	57165423	57176355	57170889	123
ENSACAG00000003650	0.141427	0.86802	0.162931	1.29025e-20	0.106717	0.787675	0.135483	6.28075e-22	0.118952	0.957938	0.124175	5.97636e-25	1	211901480	211922103	211912000	606
ENSACAG00000003653	0.0267507	0.771722	0.0346636	2.83098e-39	0.0590765	0.909476	0.0649566	5.01629e-35	0.0404422	0.98642	0.0409989	2.35003e-43	4	49200934	49225488	49213211	642
ENSACAG00000003654	0.0473648	0.890417	0.053194	3.67163e-50	0.107496	1.12018	0.0959635	7.20072e-42	0.0715489	1.04178	0.0686792	6.92226e-49	4	18945060	18953580	18949320	873
ENSACAG00000003657	0.131153	0.853357	0.153691	3.49997e-23	0.126426	0.921591	0.137183	4.86463e-25	0.136756	0.842574	0.162308	2.46082e-21	Un0519	198829	209072	203950	618
ENSACAG00000003659	0.0773264	1.12358	0.0688214	1.95745e-85	0.0994123	1.44687	0.0687085	1.84683e-91	0.0514978	1.19066	0.0432515	1.38685e-104	Un0273	516870	532246	524558	1536
ENSACAG00000003668	0.0143667	0.434707	0.0330491	2.24266e-31	0.0179752	0.609354	0.0294988	9.21689e-41	0.0198168	0.716289	0.0276659	6.63207e-46	4	57230498	57231239	57230900	738
ENSACAG00000003669	0.0369494	0.433811	0.0851739	2.60759e-26	0.0456382	0.476862	0.0957052	3.28546e-27	0.0440773	0.527439	0.0835685	6.82258e-31	4	58052811	58161348	58107100	858
ENSACAG00000003670	0.122538	0.711022	0.17234	3.05733e-09	0.134411	0.586409	0.22921	6.41226e-07	0.175463	0.649758	0.270043	3.12595e-06	4	131409068	131417051	131413000	282
ENSACAG00000003671	0.0707368	0.722673	0.0978822	2.32634e-25	0.0801694	0.714342	0.112228	2.23777e-23	0.0862788	0.7425	0.1162	7.24427e-23	4	18975515	18992436	18984000	594
ENSACAG00000003672	0.0454203	0.808617	0.0561704	1.6661e-12	0.0481308	0.942155	0.0510858	2.20972e-14	0.0694732	0.996787	0.0696972	9.03306e-13	4	131463833	131469680	131467000	228
ENSACAG00000003673	0.0550607	0.61402	0.0896725	1.25445e-41	0.0702849	0.704078	0.0998255	4.41465e-43	1.19944	NA	NA	1.16887e-06	2	52224909	52285421	52255165	1131
ENSACAG00000003674	0.0431695	1.57495	0.0274101	1.15766e-21	0.0511533	1.33135	0.0384223	2.30563e-18	0.0672787	1.03078	0.0652699	3.39269e-14	Un0110	1289227	1316412	1302820	252
ENSACAG00000003676	0.0701634	0.567503	0.123635	7.48693e-07	0.0853087	0.558173	0.152836	4.10283e-06	0.0851468	0.614436	0.138577	9.60808e-07	1	41790851	41812036	41801400	192
ENSACAG00000003681	NA	1.1535	0	NA	NA	1.65465	0	NA	NA	1.36297	0	NA	3	99290143	99295679	99292911	138
ENSACAG00000003686	0.0689678	0.46371	0.148731	4.09252e-16	0.0872657	0.612911	0.142379	1.42573e-19	0.0989506	0.612142	0.161647	5.69328e-18	4	147844628	147877736	147861182	636
ENSACAG00000003687	0.021959	0.379782	0.05782	1.69551e-26	0.0176627	0.459978	0.0383991	9.23582e-35	0.0176627	0.54183	0.0325983	1.83608e-40	3	38383921	38386291	38385106	792
ENSACAG00000003688	0.087892	1.4329	0.0613387	9.88321e-13	0.117501	3.41148	0.0344428	3.58756e-14	0.106972	1.38668	0.0771428	6.70561e-12	Un0759	73262	77044	75153	177
ENSACAG00000003692	0.0853768	0.675084	0.126468	6.82664e-36	0.0818822	0.812736	0.100749	2.76504e-44	0.0972905	0.759509	0.128097	2.28983e-37	1	256066441	256102756	256085000	1056
ENSACAG00000003693	0.200932	1.75287	0.11463	2.86092e-14	0.207464	1.82427	0.113725	2.50694e-13	0.213915	1.95346	0.109506	2.48994e-14	f	4009329	4015885	4012607	267
ENSACAG00000003694	0.0108743	1.30008	0.00836433	1.33731e-34	0.014475	1.53749	0.00941473	5.1264e-36	0.014513	1.39985	0.0103675	8.88477e-37	1	41764856	41786093	41775500	354
ENSACAG00000003695	0.042839	2.61055	0.01641	1.15418e-44	0.0649441	1.70413	0.03811	5.21717e-34	0.0389288	1.52099	0.0255944	4.13444e-38	Un0759	64923	71067	67995	426
ENSACAG00000003697	0.128409	1.17981	0.108839	6.11471e-24	0.0985413	1.52627	0.0645637	1.28645e-32	0.109855	1.54444	0.0711295	7.60286e-32	Un0451	162808	172657	167732	477
ENSACAG00000003699	0.118979	3.11832	0.038155	3.78601e-114	0.136171	1.74948	0.0778355	3.06556e-89	0.131508	1.35445	0.0970932	7.24842e-77	Un0457	345318	347055	346186	1482
ENSACAG00000003702	0.0718244	0.693035	0.103638	1.47838e-40	0.0868466	0.838466	0.103578	5.39303e-44	0.152696	0.901829	0.169318	3.48339e-32	3	38364818	38376057	38370400	1017
ENSACAG00000003703	0.0372838	0.874623	0.0426284	7.64547e-29	0.0879312	1.34679	0.0652893	5.73978e-30	0.0407718	1.35553	0.0300781	3.36955e-38	f	3967122	3975630	3971376	462
ENSACAG00000003704	0.0626094	1.5321	0.0408651	2.93693e-109	0.0637594	1.6908	0.0377095	3.20727e-114	0.111699	1.34003	0.0833554	1.71713e-78	Un0750	92991	110165	101578	1407
ENSACAG00000003705	0.0462006	1.32326	0.0349142	6.06427e-40	0.0301274	1.11513	0.0270169	3.04778e-40	0.0368401	1.13469	0.0324672	5.0329e-38	1	216890810	216891314	216891062	504
ENSACAG00000003706	0.06488	0.802868	0.0808103	2.84246e-57	0.0692642	0.912716	0.075888	3.79208e-62	0.0667305	0.876561	0.0761276	9.84006e-61	Un0026	2366849	2377131	2371990	1197
ENSACAG00000003707	0.0128261	0.540513	0.0237295	1.2995e-16	0.0279888	0.375446	0.074548	2.05942e-10	0.0171224	0.487807	0.0351007	2.11708e-14	Un0127	714909	742078	728494	306
ENSACAG00000003709	0.117494	1.05822	0.111029	4.26801e-12	0.108733	1.23656	0.0879324	1.38191e-13	0.155681	1.06714	0.145886	1.81162e-09	Un0091	80381	81072	80726.5	243
ENSACAG00000003710	0.0458495	1.04363	0.0439327	9.31907e-32	0.0458904	0.872948	0.0525694	1.0353e-27	0.044413	0.950575	0.0467222	1.15886e-30	4	131544465	131553943	131549204	468
ENSACAG00000003711	0.0259359	0.567469	0.0457045	5.11159e-80	0.0286059	0.598982	0.0477575	3.76731e-81	0.0289989	0.612164	0.0473711	2.90525e-83	Un0091	111604	170819	141212	1749
ENSACAG00000003716	0.0492454	1.05715	0.0465832	7.17928e-55	0.0557135	1.24055	0.0449104	3.81523e-58	0.0521912	1.41177	0.0369687	1.90334e-64	Un3153	3777	9768	6772.5	831
ENSACAG00000003717	0.0653317	0.455231	0.143513	9.61089e-15	0.0816272	0.492531	0.16573	1.13307e-13	0.0776475	0.490377	0.158342	1.97524e-14	5	133922347	134068802	133996000	567
ENSACAG00000003720	0.240684	0.686892	0.350396	5.18827e-31	0.253344	0.824433	0.307295	4.09797e-40	0.249568	0.825033	0.302495	5.11774e-41	Un0029	761909	774377	768143	2700
ENSACAG00000003722	0.0624693	0.852048	0.0733166	4.14487e-11	0.0547755	1.01652	0.0538854	3.12418e-13	1.12384	NA	NA	0.00225985	Un0555	208460	217000	212730	186
ENSACAG00000003723	0.0851215	0.78494	0.108443	2.77077e-39	0.100259	0.879411	0.114006	1.52015e-39	0.0909696	1.05924	0.0858819	2.50545e-50	4	49141575	49151361	49146468	999
ENSACAG00000003724	0.00819485	0.707525	0.0115824	2.00161e-49	0.0129415	0.865676	0.0149496	1.06306e-53	0.0485991	1.05666	0.045993	4.5641e-48	Un0668	21118	48979	35048.5	672
ENSACAG00000003726	0.177565	0.824968	0.215239	2.52491e-07	0.16839	0.920724	0.182889	5.22205e-09	0.178599	1.02473	0.174289	2.25173e-09	1	41737507	41752994	41745300	273
ENSACAG00000003728	0.0355472	0.691785	0.0513848	2.54359e-39	0.0380844	0.712786	0.0534303	1.3006e-38	0.0414468	0.64801	0.0639601	1.69915e-35	4	19002408	19008734	19005571	762
ENSACAG00000003734	0.150691	NA	NA	1.53273e-11	0.0973425	NA	NA	3.2902e-13	0.120178	NA	NA	1.51026e-11	Un0222	495057	506372	500714	129
ENSACAG00000003735	0.160968	0.854119	0.188461	1.53663e-07	0.16559	0.795772	0.208087	9.82586e-07	0.223026	0.774533	0.287949	0.000101801	1	41730999	41737098	41734000	228
ENSACAG00000003736	0.0489164	0.342718	0.142731	5.33478e-08	0.0468491	0.272442	0.17196	6.84242e-06	0.0468749	0.290336	0.16145	2.29207e-06	Un0127	779897	797029	788463	321
ENSACAG00000003739	0.031384	0.678135	0.0462798	1.66451e-45	0.0263702	0.813326	0.0324226	1.3528e-55	0.0263275	0.792573	0.0332178	2.30806e-54	Un1857	2117	3260	2688.5	831
ENSACAG00000003741	0.140743	0.558007	0.252224	0.00981422	0.176444	0.466359	0.378344	0.0709894	0.158145	0.471201	0.335621	0.0612571	Un0388	156271	157534	156902	93
ENSACAG00000003743	0.0626117	1.19391	0.0524424	5.45026e-14	0.0812612	1.28795	0.0630932	4.1816e-14	0.0899506	1.11254	0.0808515	9.2968e-12	Un0759	48657	51220	49938.5	210
ENSACAG00000003745	0.0893042	0.731962	0.122007	3.55469e-14	0.0927605	0.920636	0.100757	2.43231e-17	0.0895	0.901668	0.0992605	1.91326e-17	4	131588273	131761342	131675000	402
ENSACAG00000003747	0.108814	0.687136	0.158358	4.46978e-08	0.145631	0.90953	0.160117	2.37742e-08	0.112195	1.00975	0.111111	7.17391e-11	4	49035786	49055289	49045500	225
ENSACAG00000003749	0.25819	1.04119	0.247974	2.01758e-05	0.216338	5.58077	0.0387649	2.39748e-12	0.209006	1.91751	0.108999	8.8638e-11	Un0759	7228	17535	12381.5	201
ENSACAG00000003751	0.0350133	0.43967	0.0796355	5.3145e-06	0.0438302	0.39888	0.109883	5.01161e-05	0.0350133	0.43967	0.0796355	5.3145e-06	6	68304494	68316475	68310500	153
ENSACAG00000003752	0.248942	0.968159	0.257129	3.38126e-26	0.254237	1.02476	0.248094	1.26698e-27	0.266822	0.940194	0.283795	4.91262e-23	Un1340	20973	22974	21973.5	1227
ENSACAG00000003753	0.0508809	1.2192	0.041733	1.80626e-21	0.0691521	1.15884	0.0596737	2.68096e-19	0.0781508	1.61425	0.0484131	1.68873e-21	Un0222	511651	536409	524030	273
ENSACAG00000003756	0.00366142	0.655756	0.00558351	2.51684e-26	0.158674	1.80614	0.0878524	1.50906e-21	0.011047	0.868402	0.012721	1.53112e-29	Un0146	452040	455773	453906	363
ENSACAG00000003758	0.087634	0.959299	0.0913521	2.78885e-32	0.168222	1.23536	0.136172	2.82232e-27	0.355386	1.50882	0.235538	4.32189e-16	Un0388	105810	135519	120664	663
ENSACAG00000003766	0.0221146	0.933243	0.0236965	1.23459e-13	0.0146282	0.952197	0.0153626	1.30078e-14	0.014624	0.789994	0.0185116	6.75952e-13	Un0302	52815	58533	55674	177
ENSACAG00000003767	0.0749192	0.773833	0.0968156	1.01473e-47	0.0759383	0.922631	0.0823062	4.64274e-57	0.0698847	0.92048	0.075922	1.51654e-58	3	38338186	38345102	38341644	1089
ENSACAG00000003768	0.0500356	0.654579	0.0764393	1.59534e-35	0.0434444	0.658744	0.0659504	7.06081e-38	0.0434937	0.707398	0.0614841	1.41112e-40	Un0238	686186	773002	729594	816
ENSACAG00000003769	0.0781085	0.764212	0.102208	7.87763e-54	0.131284	0.895723	0.146568	8.17793e-46	0.714155	4.79168	0.14904	1.43503e-19	Un0110	1362295	1567299	1464797	1419
ENSACAG00000003771	0.0139247	0.931435	0.0149497	1.64657e-26	0.0139205	0.933411	0.0149136	1.55544e-26	0.103048	0.885241	0.116407	5.95843e-14	Un0127	812083	838087	825085	324
ENSACAG00000003772	0.0479514	0.728139	0.0658547	9.42197e-44	0.104101	0.977097	0.106541	1.0091e-40	0.0559321	0.944867	0.0591957	5.46464e-52	Un0094	744859	750844	747852	882
ENSACAG00000003774	0.109495	1.2406	0.0882594	1.19959e-11	0.132833	1.36546	0.097281	1.73002e-11	0.137226	2.02574	0.067741	2.73106e-13	Un1340	37568	40051	38809.5	204
ENSACAG00000003776	0.0855483	0.68358	0.125148	0.00103708	0.0964158	0.939726	0.1026	4.94034e-05	1.44225	NA	NA	0.0296826	Un1087	11098	24461	17779.5	69
ENSACAG00000003777	0.051416	0.68534	0.0750226	3.29255e-14	0.0608421	0.759193	0.0801405	9.01685e-15	0.0630845	0.733991	0.0859473	1.45795e-13	Un0555	201043	207163	204103	312
ENSACAG00000003778	0.0368576	0.564172	0.0653304	1.79143e-18	0.0462199	0.773873	0.0597254	8.3622e-23	0.0508771	0.568817	0.0894437	7.60307e-17	4	49007742	49019165	49013500	432
ENSACAG00000003779	0.26075	0.672585	0.387683	2.91236e-09	0.319905	0.751277	0.425815	2.40936e-08	0.348212	0.696005	0.500301	8.80286e-06	Un0001	11697277	11725911	11711594	909
ENSACAG00000003780	0.198328	0.641606	0.309112	3.28792e-09	0.213267	0.720558	0.295974	3.31214e-10	0.205435	0.696892	0.294787	4.7518e-10	4	48982204	48993074	48987639	591
ENSACAG00000003781	0.100464	0.241537	0.415935	0.0846173	0.0448372	0.204294	0.219474	0.00952412	0.111293	0.232011	0.479687	0.0940374	Un0092	1605803	1669063	1637433	177
ENSACAG00000003782	0.0518879	0.600985	0.0863382	1.9096e-78	0.0819155	0.697811	0.117389	4.79799e-72	0.0530065	0.705723	0.0751094	1.62755e-91	Un0127	1110620	1201117	1155870	2118
ENSACAG00000003783	0.075009	0.88934	0.0843424	1.98558e-40	0.094337	1.17277	0.0804396	4.69959e-46	0.0979657	1.29699	0.0755332	1.33511e-48	3	39286516	39292270	39289393	792
ENSACAG00000003784	0.0680632	0.684401	0.0994493	1.28687e-06	0.079405	0.575968	0.137863	2.40453e-05	0.0996147	0.748089	0.133159	4.83152e-06	f	3933927	3960827	3947377	141
ENSACAG00000003787	0.0569343	1.10129	0.0516977	1.64914e-91	0.0642968	1.08741	0.0591284	6.63505e-86	0.0670917	1.13009	0.0593685	3.93396e-88	4	19214938	19235074	19225006	1419
ENSACAG00000003792	0.0615956	1.41438	0.0435496	1.19451e-13	0.277659	NA	NA	1.39331e-11	0.0869126	0.974538	0.0891834	5.71394e-09	f	3894749	3900869	3897809	150
ENSACAG00000003793	0.0403063	0.540449	0.0745792	1.01203e-30	0.059059	0.472832	0.124905	3.22187e-22	0.0600939	0.495344	0.121318	7.99806e-23	Un0001	11110470	11111238	11110854	759
ENSACAG00000003794	0.0148117	1.40168	0.0105671	2.82407e-24	0.0197777	1.43328	0.013799	1.61628e-23	0.0147693	1.79808	0.00821392	7.88882e-29	Un0094	724429	740173	732301	255
ENSACAG00000003798	0.118025	0.94357	0.125083	3.54874e-06	0.159242	1.09896	0.144903	6.8026e-06	0.118025	0.94357	0.125083	3.54874e-06	3	39294350	39298856	39296603	114
ENSACAG00000003799	NA	0.383208	0	NA	NA	0.452486	0	NA	NA	0.496218	0	NA	Un0092	1226957	1246133	1236545	273
ENSACAG00000003800	0.099678	0.642555	0.155127	1.94296e-12	0.115194	0.965991	0.11925	4.57907e-16	0.130222	0.902469	0.144295	1.4155e-14	6	68289535	68296254	68292900	375
ENSACAG00000003807	0.0635288	2.07719	0.0305841	4.93639e-09	0.0638378	NA	NA	6.31398e-11	0.0636689	1.98626	0.0320548	5.96164e-09	Un0094	680873	694404	687638	102
ENSACAG00000003808	0.00857071	0.720651	0.011893	1.5062e-51	0.014616	0.835264	0.0174987	1.45177e-54	0.0166506	0.72818	0.022866	1.78276e-48	Un0094	661064	669047	665056	753
ENSACAG00000003809	0.0281533	1.07552	0.0261765	2.36885e-34	0.0440822	1.56519	0.0281642	3.91455e-38	0.114771	NA	NA	1.8608e-48	Un0168	270370	278685	274528	429
ENSACAG00000003811	0.127827	0.651296	0.196266	1.91299e-05	0.136289	0.705242	0.193251	1.07964e-05	0.165656	0.743139	0.222914	1.68187e-05	Un0092	935911	957381	946646	186
ENSACAG00000003812	0.0482951	1.213	0.0398147	6.61114e-30	0.0534768	1.18456	0.045145	2.7738e-29	0.0586424	1.22087	0.0480334	3.27325e-28	6	78696227	78728643	78712435	399
ENSACAG00000003813	0.117946	0.695404	0.169609	6.08565e-30	0.127014	0.815566	0.155737	1.03478e-33	0.142079	0.775473	0.183216	3.26591e-29	5	134073852	134088230	134081041	1065
ENSACAG00000003815	0.111082	0.751342	0.147845	1.27408e-60	0.122659	0.825276	0.148628	4.262e-63	0.118092	0.864654	0.136577	8.08003e-68	3	39310410	39346991	39328700	1881
ENSACAG00000003816	0.0511119	0.905629	0.056438	6.19867e-71	0.0527301	0.904366	0.0583062	2.76089e-69	0.0552886	0.90353	0.0611918	2.28506e-68	4	58372806	58384197	58378500	1248
ENSACAG00000003817	0.00679213	0.526531	0.0128998	7.85996e-35	0.0113669	0.564487	0.0201366	9.28356e-35	0.00907262	0.525875	0.0172524	1.06883e-33	Un0064	896991	897750	897370	597
ENSACAG00000003819	0.0347132	0.900556	0.0385464	3.83782e-45	0.0866908	1.20955	0.0716718	4.29888e-41	0.0694644	1.08137	0.0642372	3.00941e-41	Un0146	460971	487247	474109	669
ENSACAG00000003820	0.11227	0.784074	0.143188	4.71595e-10	0.12648	1.02101	0.123877	4.89758e-11	0.0964898	1.03034	0.0936482	1.85861e-13	6	68262104	68265170	68263637	231
ENSACAG00000003823	0.0570627	1.01727	0.0560939	1.5905e-23	0.0751654	1.32021	0.0569344	1.51926e-24	0.174619	1.72101	0.101463	2.10418e-19	6	68227757	68251404	68239600	351
ENSACAG00000003824	0.172819	1.01979	0.169466	5.59472e-27	0.18123	1.04959	0.172668	2.20399e-27	0.171765	1.02116	0.168207	2.87155e-27	Un0034	2314445	2372767	2343606	858
ENSACAG00000003825	0.12768	0.696567	0.183299	1.06568e-28	0.116614	0.833469	0.139914	1.57575e-38	0.150066	1.04757	0.143251	9.33525e-41	Un0094	605661	625062	615362	1068
ENSACAG00000003826	0.068984	0.740951	0.0931019	9.5333e-14	0.091419	1.01446	0.0901162	4.77714e-16	0.130997	1.54671	0.0846939	4.58653e-18	Un1087	56726	68763	62744.5	276
ENSACAG00000003827	0.121495	0.471606	0.25762	1.24046e-10	0.143069	0.580601	0.246415	4.45842e-12	0.144497	0.624303	0.231453	9.4797e-14	3	23691192	23701269	23696200	633
ENSACAG00000003831	0.00504117	0.84822	0.00594324	8.85207e-23	0.0101519	1.04393	0.00972467	9.40576e-25	0.00505435	0.99042	0.00510323	3.57585e-25	Un1967	9672	13969	11820.5	264
ENSACAG00000003837	0.197381	0.820685	0.240507	2.84018e-18	0.22538	0.916339	0.245957	6.66989e-18	0.211466	0.941918	0.224506	3.02459e-20	Un0092	740717	790547	765632	819
ENSACAG00000003838	0.0888456	0.51361	0.172983	9.14532e-08	0.094584	0.884691	0.106912	1.69903e-13	0.074792	0.993841	0.0752555	1.28514e-16	Un0222	649243	660823	655033	294
ENSACAG00000003841	0.0101404	0.518454	0.019559	3.6448e-07	0.0204636	0.676459	0.030251	6.01159e-08	0.0101404	1.03551	0.00979272	1.9359e-11	1	85517546	85538285	85527900	126
ENSACAG00000003843	0.0235636	0.311242	0.0757083	3.07245e-28	0.0349215	0.451335	0.0773738	4.06871e-38	0.0336406	0.417976	0.0804846	2.10453e-34	3	24148270	24204471	24176400	1086
ENSACAG00000003844	0.0389575	0.531292	0.0733259	7.44637e-19	0.0641284	0.764033	0.083934	2.37134e-22	0.0703165	0.815787	0.0861946	8.49588e-23	4	58428462	58470904	58449683	462
ENSACAG00000003845	0.0514639	0.74759	0.0688398	1.07943e-78	0.0603809	0.78411	0.0770057	5.45056e-77	1.24948	3.43567	0.363679	9.43211e-07	Un0555	104351	135938	120144	1704
ENSACAG00000003847	0.0964956	0.86705	0.111292	3.48445e-32	0.0275494	0.946691	0.0291007	4.6211e-55	0.0412687	0.927352	0.0445016	1.29986e-48	4	131779952	131801016	131790484	786
ENSACAG00000003848	0.0306382	0.432365	0.0708618	1.30897e-14	0.03424	0.377313	0.090747	3.37372e-12	0.0378434	0.36069	0.104919	3.83576e-11	4	92809732	92855848	92832790	381
ENSACAG00000003849	0.0729355	0.893241	0.0816527	4.6892e-16	0.0990061	1.12621	0.0879106	2.9787e-17	0.14003	1.58388	0.0884094	2.78796e-18	f	3689235	3693025	3691130	303
ENSACAG00000003850	0.0392373	0.898172	0.0436857	2.62646e-30	0.0600285	0.874344	0.0686554	8.59995e-26	0.065982	1.07057	0.0616325	2.72704e-29	1	256147872	256197885	256173000	477
ENSACAG00000003857	0.123937	1.16065	0.106782	4.51237e-15	0.11809	1.50609	0.0784083	1.91917e-18	0.125821	1.46034	0.0861593	6.00041e-18	Un0388	79304	99158	89231	276
ENSACAG00000003858	0.0448603	1.16	0.0386726	1.3438e-44	0.0469825	1.01759	0.0461703	3.01375e-40	0.0428292	0.889012	0.0481761	2.62913e-37	Un0013	2568241	2568934	2568590	648
ENSACAG00000003865	0.0822026	1.2707	0.0646909	3.01231e-23	0.0684137	2.46706	0.0277309	1.95659e-32	0.0843617	2.05092	0.0411335	1.3712e-28	Un0327	785	6086	3435.5	357
ENSACAG00000003867	0.0814691	1.3654	0.0596668	1.00152e-20	0.100236	0.863295	0.116109	1.58882e-12	0.125804	1.27812	0.0984283	1.06779e-15	Un2713	627	12343	6485	264
ENSACAG00000003875	0.064996	0.656843	0.0989521	2.26682e-19	0.0851762	0.670149	0.1271	5.0452e-17	0.0697512	0.790205	0.0882698	4.89757e-22	Un0013	880989	896751	888870	486
ENSACAG00000003876	0.0376595	0.551818	0.0682461	6.75634e-36	0.0492704	0.682245	0.0722181	1.31712e-40	0.0500807	0.674415	0.0742579	2.54725e-39	1	43049634	43077785	43063700	888
ENSACAG00000003877	NA	NA	NA	NA	0.701841	1.66557	0.421383	0.420055	NA	NA	NA	NA	Un0297	432038	449616	440827	36
ENSACAG00000003880	0.0184665	0.787702	0.0234435	1.68826e-44	0.0194727	0.938138	0.0207568	6.1231e-49	0.0278277	1.16056	0.0239779	1.51168e-52	Un0222	688462	704178	696320	639
ENSACAG00000003883	0.0357409	0.929255	0.038462	1.07687e-94	0.0429167	0.9027	0.0475426	5.57797e-87	0.0501007	0.998636	0.0501691	3.67087e-90	4	93106606	93125917	93116300	1440
ENSACAG00000003886	0.0247002	0.861528	0.0286702	1.7011e-36	0.0460343	0.929382	0.0495321	9.5348e-33	0.0667855	0.888973	0.0751267	2.88583e-28	3	183105488	183123856	183114672	513
ENSACAG00000003889	0.0427382	0.762159	0.0560752	1.24472e-138	0.0467866	0.86183	0.0542875	6.89369e-150	0.0515743	0.807488	0.0638701	1.00095e-136	4	19305512	19329180	19317346	2718
ENSACAG00000003892	0.059103	1.45919	0.040504	1.08858e-42	0.115022	1.56014	0.0737253	7.64565e-34	0.11626	1.01935	0.114053	6.24674e-25	Un0589	132827	144569	138698	567
ENSACAG00000003893	0.245197	0.735261	0.333483	1.40865e-10	0.257375	0.847639	0.303638	1.96296e-12	0.267831	0.889765	0.301014	1.13182e-12	1	85458871	85459807	85459339	711
ENSACAG00000003894	0.0435945	NA	NA	3.28576e-32	0.0499683	NA	NA	2.18891e-38	0.043584	NA	NA	7.11119e-26	Un2800	4906	12036	8471	213
ENSACAG00000003895	0.070991	0.849626	0.0835556	7.25145e-35	0.0919604	1.23067	0.0747237	2.48685e-41	0.0988775	1.65468	0.0597561	1.13357e-48	4	148094405	148095146	148095000	720
ENSACAG00000003897	0.218841	0.832475	0.26288	1.64954e-20	0.25351	0.962847	0.263292	2.29531e-21	0.253285	1.09728	0.23083	2.7456e-25	4	148153955	148180360	148167000	1044
ENSACAG00000003898	0.0340049	0.686717	0.0495181	4.53263e-75	0.0417686	0.735836	0.0567635	1.95259e-75	0.0353988	0.70976	0.0498743	3.29106e-77	Un0064	1018264	1019842	1019053	1488
ENSACAG00000003900	0.106186	0.736916	0.144096	3.30775e-94	0.130413	0.834583	0.156262	1.0599e-93	0.111327	0.803685	0.13852	2.0282e-101	Un0013	815565	870897	843231	3048
ENSACAG00000003901	0.0301949	0.385762	0.0782733	1.26348e-07	0.0501249	0.510406	0.0982059	1.40291e-08	0.0500721	0.512761	0.0976519	1.30591e-08	6	78582976	78593274	78588125	222
ENSACAG00000003905	0.0305124	0.547494	0.055731	2.87106e-33	0.0351105	0.63019	0.0557142	5.97735e-36	0.0296558	0.755367	0.0392602	3.07395e-44	Un0034	2173527	2196746	2185140	759
ENSACAG00000003907	0.0209492	0.687791	0.0304587	2.06944e-26	0.00889962	0.690751	0.012884	3.87829e-30	0.0148824	0.517242	0.0287727	4.56549e-22	1	85200149	85262860	85231500	441
ENSACAG00000003908	0.189507	0.647316	0.292759	5.04487e-18	0.201398	0.580539	0.346915	1.83287e-13	0.245235	0.73474	0.333772	1.00424e-15	Un0064	1235694	1255827	1245760	1194
ENSACAG00000003910	0.0175651	0.492355	0.0356757	2.10055e-26	0.019769	0.607368	0.0325486	4.73562e-31	0.0264559	0.627518	0.0421596	9.13747e-30	Un0238	576254	601627	588940	591
ENSACAG00000003911	0.102896	1.07681	0.0955562	3.11292e-22	0.100945	1.06162	0.0950857	1.24165e-21	0.10995	1.41335	0.0777937	6.1086e-26	f	1892985	1895635	1894310	393
ENSACAG00000003912	0.0698266	0.846665	0.0824725	1.04808e-29	0.0889033	0.843755	0.105366	2.74511e-26	0.173883	1.21946	0.14259	1.12292e-24	Un0388	55390	76617	66003.5	609
ENSACAG00000003913	0.0959665	0.821385	0.116835	3.0735e-98	0.134839	0.946892	0.142401	7.42083e-91	0.115171	0.920335	0.125141	4.89691e-99	Un0094	582926	604672	593799	2598
ENSACAG00000003916	0.0751621	0.497754	0.151003	0.000204521	0.0753456	0.99435	0.0757737	8.84243e-08	0.0756476	1.3069	0.0578832	2.8648e-09	5	27098406	27101609	27100000	117
ENSACAG00000003917	0.0542263	0.311524	0.174068	0.00152551	0.0634315	0.36084	0.175788	0.000845527	0.0636339	0.403289	0.157788	0.00028404	3	1472163	1476433	1474298	150
ENSACAG00000003918	0.00445913	0.639082	0.0069774	5.7906e-21	NA	0.858315	0	NA	0.00892744	0.679027	0.0131474	1.04626e-20	3	1479846	1498177	1489010	297
ENSACAG00000003919	0.0375307	0.4705	0.0797676	3.51609e-53	0.0384427	0.521345	0.0737376	6.48788e-59	0.0440849	0.60323	0.0730814	3.89497e-65	4	58486130	58498446	58492288	1512
ENSACAG00000003923	0.0277903	0.44199	0.0628753	2.18742e-26	0.0277721	0.670438	0.0414238	2.73993e-39	0.0277738	0.596067	0.046595	2.40853e-35	Un0091	199330	229248	214289	762
ENSACAG00000003926	NA	0.995103	0	NA	0.0191473	0.865803	0.0221151	3.13537e-10	0.00948191	0.885218	0.0107114	3.25777e-11	5	27093312	27095283	27094300	135
ENSACAG00000003927	0.0266559	0.566751	0.0470329	1.73477e-14	0.0933449	0.833716	0.111963	6.30053e-13	0.0471699	0.527396	0.0894392	1.01918e-11	Un0034	2010357	2020898	2015630	297
ENSACAG00000003931	0.139277	0.987411	0.141053	2.03302e-34	0.1567	0.961541	0.162968	8.25738e-31	0.149768	1.03281	0.14501	4.22793e-34	Un0034	2008940	2010158	2009549	897
ENSACAG00000003933	0.045223	0.746773	0.060558	5.86942e-10	0.0525598	0.662028	0.0793922	1.32306e-08	0.0600051	0.587343	0.102164	2.22619e-07	5	134384459	134453861	134419160	183
ENSACAG00000003935	0.0373643	1.80066	0.0207504	5.63779e-21	0.056584	2.76313	0.0204782	3.77671e-21	0.183641	NA	NA	3.68137e-18	Un0082	211208	220425	215816	213
ENSACAG00000003936	0.0961525	0.9955	0.0965871	1.95032e-34	0.109297	0.965526	0.113199	1.80646e-30	0.120517	1.26469	0.0952936	1.10545e-36	5	27085300	27086080	27085690	714
ENSACAG00000003937	0.156703	0.741379	0.211367	3.16633e-23	0.16072	0.868763	0.184999	4.54106e-27	0.161116	0.864992	0.186263	8.17297e-28	4	93265221	93294306	93279800	1002
ENSACAG00000003939	0.0869286	0.620452	0.140105	4.46176e-30	0.163102	0.841331	0.193862	2.97519e-27	0.0830279	0.810853	0.102396	5.43748e-42	5	27065124	27074871	27070000	999
ENSACAG00000003940	0.0911476	0.820958	0.111026	4.52866e-14	0.100663	0.907459	0.110929	1.21473e-14	0.0821744	0.925148	0.0888229	1.30015e-16	1	90672033	90681467	90676750	312
ENSACAG00000003941	0.0311586	1.02556	0.0303822	5.11057e-14	0.0472862	2.40773	0.0196393	1.14117e-18	1.37956	NA	NA	0.0606681	Un0109	1355025	1433299	1394162	174
ENSACAG00000003942	0.0415644	0.648718	0.0640716	6.67892e-45	0.0408656	0.773997	0.0527982	1.83681e-52	0.0381387	0.727001	0.0524603	1.09417e-50	3	182514846	182552431	182534000	999
ENSACAG00000003945	0.111698	1.71707	0.0650515	8.27107e-10	0.1057	NA	NA	7.15653e-13	0.153777	1.71615	0.089606	6.59923e-09	2	3533646	3535511	3534580	129
ENSACAG00000003947	0.109623	0.687509	0.15945	1.30258e-32	0.130975	0.741332	0.176675	4.50509e-31	0.117948	0.662327	0.178082	1.44745e-29	2	3558187	3607361	3582774	1125
ENSACAG00000003948	0.00881463	0.603592	0.0146036	1.80811e-19	0.00440015	0.694567	0.00633509	6.71591e-23	0.00882126	0.696529	0.0126646	9.56965e-22	Un0222	720980	769368	745174	303
ENSACAG00000003951	0.0905111	0.627613	0.144215	2.38558e-19	0.103421	0.575182	0.179805	5.48516e-16	0.153688	0.659856	0.232912	1.11396e-13	4	148031245	148055444	148043000	690
ENSACAG00000003952	0.033704	3.08282	0.0109328	1.57713e-46	0.033709	NA	NA	2.10596e-55	0.0301685	NA	NA	1.07058e-58	5	134533375	134534133	134533754	390
ENSACAG00000003953	0.0573101	0.869558	0.0659072	1.23999e-44	0.054739	1.04802	0.052231	6.30899e-52	0.057272	1.00393	0.0570476	3.15802e-50	4	19330082	19344763	19337400	849
ENSACAG00000003954	0.152544	0.808217	0.188741	2.79325e-07	0.127655	0.832513	0.153337	9.3542e-09	0.127684	0.83135	0.153586	9.56508e-09	3	39524074	39539977	39532000	225
ENSACAG00000003956	0.137071	1.02014	0.134364	1.66585e-21	0.136336	1.25516	0.10862	1.26036e-25	0.129201	1.16532	0.110871	2.63202e-25	1	197222570	197227980	197225275	561
ENSACAG00000003957	0.0626983	0.42456	0.147679	2.72264e-10	0.0664455	0.562441	0.118138	1.52998e-12	0.0628516	0.576249	0.10907	2.51173e-13	Un0238	521933	563051	542492	369
ENSACAG00000003959	0.0213861	0.367399	0.0582095	2.11934e-10	0.0301708	0.491995	0.0613233	1.51876e-12	0.0301586	0.439143	0.0686762	3.23492e-11	5	134722452	134747365	134735000	306
ENSACAG00000003962	0.00900368	0.545754	0.0164977	1.17716e-18	0.0250536	0.644631	0.038865	1.91624e-21	0.0208153	0.785323	0.0265054	2.57645e-24	4	58991549	59012234	59001900	336
ENSACAG00000003963	0.124989	0.722327	0.173037	5.73275e-12	0.144973	0.739433	0.19606	7.4099e-11	0.135014	0.765508	0.176372	1.09839e-11	1	197286843	197314519	197300681	387
ENSACAG00000003966	0.107058	0.782337	0.136844	2.90013e-13	0.152768	1.09415	0.139623	1.59903e-14	0.128684	0.97572	0.131886	5.91753e-15	2	52310819	52318781	52314800	363
ENSACAG00000003971	0.1074	1.01462	0.105853	6.16837e-20	0.0960409	0.795316	0.120758	9.2875e-17	0.112582	1.05571	0.106641	1.7845e-19	5	27045364	27056437	27050900	411
ENSACAG00000003974	0.00900738	0.680036	0.0132455	1.65583e-55	0.015055	0.596858	0.0252238	3.71658e-46	0.0158148	0.678329	0.0233144	8.38119e-52	5	27025258	27033459	27029400	858
ENSACAG00000003975	0.138139	1.69017	0.0817311	1.83517e-143	0.150809	2.57417	0.0585854	1.04774e-161	0.147145	1.77956	0.0826859	2.87193e-142	Un0082	154165	188752	171458	2478
ENSACAG00000003979	0.0038593	0.840147	0.0045936	4.48712e-54	0.10836	1.0682	0.101441	3.29924e-31	0.00773482	0.908748	0.00851151	3.03112e-54	Un0388	1060	18633	9846.5	666
ENSACAG00000003981	0.0208104	1.53197	0.0135841	1.36086e-18	0.0138424	1.69749	0.00815461	2.10333e-20	0.0138424	1.98572	0.00697098	1.89035e-21	Un0555	95074	101260	98167	186
ENSACAG00000003982	0.0493332	0.978547	0.0504148	3.70601e-44	0.055477	0.805427	0.068879	4.39674e-36	0.0630109	0.9344	0.0674346	1.23352e-38	3	39630583	39640782	39635700	696
ENSACAG00000003983	0.0213664	0.682819	0.0312915	6.16352e-23	0.031455	0.542214	0.0580122	5.46052e-17	0.0416106	0.599186	0.0694451	6.33311e-17	Un0001	10512608	10513205	10512900	390
ENSACAG00000003985	0.112895	0.527895	0.213859	5.83959e-29	0.133545	0.56759	0.235284	2.65131e-27	0.137811	0.618593	0.222781	2.80891e-30	Un0001	10394707	10435225	10414966	1509
ENSACAG00000003987	0.0484517	0.556479	0.0870683	1.23526e-28	0.0612681	0.656904	0.093268	5.09361e-30	0.061394	0.60857	0.100882	8.33039e-29	Un0064	1382803	1410437	1396620	798
ENSACAG00000003988	0.0309654	0.447632	0.0691759	1.29229e-30	0.0331904	0.551691	0.0601612	1.02674e-37	0.0454112	0.601626	0.0754808	1.07195e-36	2	52405567	52429436	52417500	894
ENSACAG00000003992	0.0388999	1.11919	0.0347572	1.38466e-64	0.050688	1.51183	0.0335277	4.44388e-72	0.0420261	1.31439	0.0319739	2.38249e-70	1	256345014	256351761	256348000	933
ENSACAG00000003993	0.0197981	0.526278	0.0376191	8.3849e-40	0.0220932	0.671495	0.0329015	4.93628e-49	0.0826362	0.803881	0.102796	1.54511e-35	Un0238	344160	390594	367377	861
ENSACAG00000003995	0.0324672	1.18611	0.0273729	1.11062e-28	0.0566302	1.57423	0.0359732	1.24488e-28	0.0639448	1.56153	0.0409502	1.81992e-27	Un0858	103834	108716	106275	372
ENSACAG00000003996	0.0603284	0.693057	0.0870469	9.80585e-10	0.0605687	0.571902	0.105908	3.32857e-08	0.0873972	0.811671	0.107676	1.6586e-09	1	257331130	257368894	257350012	207
ENSACAG00000003997	0.0528499	0.416772	0.126808	0.000666767	0.0856662	0.812906	0.105383	1.10852e-05	0.0859893	0.503831	0.170671	0.00105029	1	197215011	197319746	197267000	123
ENSACAG00000003999	0.0288755	0.457991	0.0630483	4.0696e-09	0.352339	1.25611	0.280501	2.54978e-05	0.0255554	0.523073	0.0488563	7.13022e-10	Un0208	72580	76512	74546	207
ENSACAG00000004001	0.00731094	0.701398	0.0104234	6.81271e-59	0.0095206	0.76352	0.0124694	4.99772e-62	0.00804712	0.694083	0.0115939	7.2268e-59	Un0013	799753	806221	802987	876
ENSACAG00000004002	0.114573	NA	NA	4.00523e-14	0.158996	NA	NA	4.3094e-14	0.180908	NA	NA	4.33543e-12	Un4105	2316	7689	5002.5	135
ENSACAG00000004004	0.0203115	0.703552	0.0288699	2.62498e-14	0.0203115	0.653787	0.0310675	1.60634e-13	0.0202682	0.569182	0.0356093	4.5521e-12	5	134798570	134806160	134802365	216
ENSACAG00000004011	0.140052	1.14554	0.122259	2.27639e-24	0.135801	1.04515	0.129934	2.08839e-23	0.1391	0.889498	0.15638	1.11425e-19	f	1745072	1758123	1751600	546
ENSACAG00000004012	0.15126	2.16367	0.0699091	3.63616e-27	0.156499	2.28321	0.0685431	1.45665e-27	0.168621	4.06907	0.0414397	3.04037e-29	Un2381	2416	4602	3509	417
ENSACAG00000004020	0.0453596	0.859343	0.0527841	2.40335e-12	0.0319814	0.813798	0.0392989	6.22931e-13	0.051977	0.944171	0.0550504	1.13882e-12	Un0256	330050	674348	502199	204
ENSACAG00000004022	0.295498	0.751922	0.392991	3.57929e-12	0.306182	0.705453	0.434022	7.726e-10	0.319189	0.83868	0.380584	3.22229e-13	2	134909792	134953241	134932000	1212
ENSACAG00000004024	0.116393	1.2798	0.090946	4.82398e-18	0.139563	1.42391	0.0980137	5.25157e-17	0.131452	1.59536	0.0823966	2.19934e-19	Un0963	327	21504	10915.5	303
ENSACAG00000004025	0.0456752	1.0159	0.0449604	1.35334e-35	0.0431752	1.14941	0.0375629	1.75106e-39	0.0713654	1.32056	0.0540419	2.51516e-36	3	185057936	185085564	185071750	537
ENSACAG00000004026	0.0400498	0.773764	0.0517597	0.00421233	0.081787	1.85814	0.0440154	0.000516365	0.740116	0.758701	0.975504	0.99958	Un1034	743	27793	14268	36
ENSACAG00000004027	0.153416	0.902219	0.170042	2.72438e-09	0.156356	1.62573	0.0961762	2.66003e-15	0.1664	1.59596	0.104263	2.75006e-14	Un0738	67123	79262	73192.5	270
ENSACAG00000004028	0.111527	0.78913	0.141329	1.66707e-17	0.110448	0.780609	0.141489	4.17447e-17	0.117744	0.795293	0.148051	5.41582e-17	5	72353499	72506746	72430100	474
ENSACAG00000004031	NA	0.589363	0	NA	0.0241397	1.1495	0.0210002	2.97663e-05	0.903885	1.71555	0.526879	0.310171	Un0251	591834	647059	619446	54
ENSACAG00000004034	0.0800917	0.630457	0.127038	1.38148e-41	0.086162	0.775428	0.111115	9.96443e-50	0.0863332	0.703018	0.122804	9.25732e-45	Un0092	100177	153743	126960	1314
ENSACAG00000004037	0.0828441	0.665451	0.124493	2.76382e-38	0.077128	0.731962	0.105372	3.30924e-44	0.0688118	0.61905	0.111157	3.49146e-38	Un0304	25204	45367	35285.5	1059
ENSACAG00000004038	0.179292	1.146	0.15645	6.94099e-19	0.222396	1.89458	0.117386	7.65576e-23	0.214811	1.99729	0.107551	2.00222e-23	Un0589	55210	75677	65443.5	462
ENSACAG00000004039	0.118628	1.21361	0.0977481	4.67453e-27	0.143929	1.02477	0.14045	7.01977e-21	0.112606	1.12611	0.0999954	3.13007e-26	Un1379	17873	26891	22382	510
ENSACAG00000004040	0.227068	0.617039	0.367996	2.15107e-06	0.255079	0.777293	0.328163	5.61323e-08	0.255705	0.871639	0.293361	1.85073e-09	Un0419	252056	281052	266554	516
ENSACAG00000004043	0.0353345	0.704049	0.0501876	5.87377e-58	0.0329285	0.804511	0.0409298	3.2409e-66	0.0432548	0.837889	0.0516235	2.41147e-62	Un0045	1756570	1814742	1785656	1092
ENSACAG00000004046	0.111281	0.800873	0.13895	3.59795e-23	0.132125	0.874787	0.151037	2.7642e-22	0.128298	0.815988	0.15723	1.90599e-21	3	23337257	23352975	23345116	630
ENSACAG00000004049	0.491222	1.53691	0.319617	0.00135455	0.477751	1.74883	0.273184	0.00136494	1.39505	0.734428	1.8995	0.0846881	Un0546	66006	112069	89037.5	150
ENSACAG00000004050	0.0773767	0.971674	0.0796324	1.21684e-51	0.0773045	1.22331	0.0631927	6.11456e-62	0.0782423	1.13583	0.0688858	8.74269e-59	4	132379091	132393260	132386000	1032
ENSACAG00000004052	0.0691753	0.518831	0.133329	1.53517e-17	0.0851981	0.54058	0.157605	7.18762e-16	0.0816458	0.658021	0.124078	4.21613e-21	2	52436437	52474179	52455308	597
ENSACAG00000004053	0.0293464	0.401431	0.0731045	4.00212e-29	0.032151	0.49021	0.0655862	7.33239e-35	0.134742	0.566229	0.237964	3.39035e-17	1	6275033	6320245	6297639	942
ENSACAG00000004054	0.0872545	0.846965	0.10302	9.60507e-57	0.112919	1.05604	0.106928	2.92656e-60	0.129766	1.21743	0.10659	3.00226e-63	Un0567	724	12179	6451.5	1326
ENSACAG00000004055	0.0762482	0.504191	0.151229	5.46703e-31	0.0847477	0.562997	0.15053	2.02545e-33	0.0901709	0.569884	0.158227	3.69758e-32	Un0006	5443523	5503809	5473666	1116
ENSACAG00000004060	0.0462402	0.446553	0.103549	4.64031e-66	0.0591167	0.502111	0.117736	1.25421e-66	0.0631434	0.537509	0.117474	1.60764e-69	Un0091	243700	303600	273650	2280
ENSACAG00000004062	0.110201	1.50241	0.0733498	7.64777e-16	0.0913115	1.47481	0.0619139	1.17513e-16	0.0937035	1.06938	0.0876238	2.25907e-13	Un0419	322304	334705	328504	252
ENSACAG00000004064	0.176638	1.51742	0.116407	4.15571e-41	0.201248	1.1137	0.180703	1.52797e-28	0.198156	1.60342	0.123583	5.25325e-40	Un1188	10283	11504	10893.5	912
ENSACAG00000004065	0.0121381	0.60347	0.0201139	5.22236e-21	0.0202683	0.537859	0.0376834	2.37699e-17	0.0730192	0.798114	0.0914897	7.22358e-17	Un1188	35528	37383	36455.5	336
ENSACAG00000004068	0.130904	0.893211	0.146554	1.46615e-20	0.13225	0.932196	0.141869	8.3811e-22	0.128295	1.04984	0.122205	1.62456e-24	Un0963	37886	56721	47303.5	567
ENSACAG00000004069	0.0104445	0.667326	0.0156513	4.19595e-31	0.0104492	0.84503	0.0123655	4.65514e-37	0.0580519	0.850708	0.0682395	6.66832e-26	1	85074230	85083629	85078900	492
ENSACAG00000004070	0.157672	0.806699	0.195453	1.02749e-22	0.163025	0.870893	0.187192	1.63024e-24	0.146851	0.922029	0.159269	8.8337e-29	1	6333328	6339570	6336449	927
ENSACAG00000004072	0.0133032	1.10252	0.0120662	1.62864e-131	0.0387989	1.03312	0.0375549	8.77753e-103	0.0198001	1.24274	0.0159326	2.31179e-133	Un2381	6138	11086	8612	1452
ENSACAG00000004077	0.0528379	0.710346	0.0743833	8.6058e-42	0.0719789	0.916717	0.0785182	1.13739e-46	0.0734265	0.863362	0.0850472	9.95177e-44	1	43000437	43001765	43001101	906
ENSACAG00000004078	0.0498913	0.938509	0.0531601	2.53921e-25	0.0684102	0.758488	0.0901928	9.96785e-18	0.0543006	0.566428	0.095865	1.01858e-14	Un0182	29126	44936	37031	396
ENSACAG00000004079	0.199709	0.903593	0.221017	2.89798e-10	0.227898	NA	NA	7.38514e-23	0.26872	1.88677	0.142424	1.69774e-15	f	3447291	3458483	3452887	381
ENSACAG00000004080	0.0390673	NA	NA	2.42195e-33	0.0390543	NA	NA	2.18677e-33	0.048061	NA	NA	7.04461e-33	Un0082	101678	107789	104734	303
ENSACAG00000004082	0.112061	NA	NA	1.01952e-28	0.189693	2.1621	0.0877356	1.69171e-17	0.104696	1.64852	0.063509	4.1799e-21	Un1664	2016	22767	12391.5	300
ENSACAG00000004084	0.0044042	0.224074	0.0196551	9.45058e-09	0.00440501	0.30245	0.0145644	1.94362e-11	0.00440501	0.242798	0.0181427	2.07981e-09	Un0091	390102	391970	391036	300
ENSACAG00000004087	0.0335649	0.0583251	0.575479	0.451603	0.0465418	0.0583578	0.797524	0.739988	0.0465752	0.0735015	0.633663	0.362545	3	23364309	23401208	23382800	315
ENSACAG00000004088	0.0274839	1.11392	0.0246731	5.22974e-46	0.0373345	1.47956	0.0252335	1.21635e-50	0.0311283	0.979837	0.0317689	7.3936e-42	Un0457	3754	7281	5517.5	558
ENSACAG00000004092	0.0896565	0.734214	0.122112	9.72289e-31	0.118089	0.632646	0.186659	1.21478e-20	0.121499	0.773251	0.157127	2.66794e-26	2	3643434	3686438	3664936	828
ENSACAG00000004093	0.0203833	0.410174	0.0496942	1.23352e-14	0.0273347	0.714853	0.0382382	1.30699e-22	0.0522272	0.616361	0.0847348	9.49488e-17	4	59094321	59109011	59101666	387
ENSACAG00000004095	0.0259165	0.498398	0.0519996	9.53334e-49	0.0271218	0.534893	0.0507051	1.55981e-51	0.0345354	0.585596	0.0589749	3.02064e-52	Un0016	703541	723697	713619	1131
ENSACAG00000004098	0.171241	0.818685	0.209165	8.65541e-12	0.176539	0.832874	0.211963	1.8951e-11	0.1998	0.768104	0.260121	2.76431e-09	Un0993	18723	28943	23833	414
ENSACAG00000004102	0.0160354	0.740239	0.0216624	9.62919e-38	0.0114412	0.839493	0.0136287	1.32884e-43	0.00913811	0.817194	0.0111823	7.34661e-44	3	39671110	39768598	39719854	573
ENSACAG00000004104	0.0460629	0.722353	0.0637679	7.45434e-49	0.0491765	0.732437	0.067141	1.74055e-48	0.0491021	0.77169	0.0636292	1.3677e-50	3	185016617	185041211	185028914	978
ENSACAG00000004105	0.0664604	0.573366	0.115913	8.84475e-15	0.0852046	0.622945	0.136777	1.09168e-13	0.0650401	0.824858	0.0788501	9.36621e-21	4	19430476	19448884	19439680	420
ENSACAG00000004108	0.190707	0.935368	0.203884	7.79416e-21	0.205069	1.10293	0.185931	5.79992e-24	0.193008	1.20949	0.159579	3.05538e-27	3	1646471	1660097	1653284	786
ENSACAG00000004111	0.00846984	0.502527	0.0168545	5.32267e-16	0.00847118	0.50212	0.0168708	5.41149e-16	0.245165	1.26652	0.193574	4.84313e-10	6	78527958	78547952	78537955	303
ENSACAG00000004114	0.0211079	0.664535	0.0317634	1.75644e-41	0.0211012	0.66566	0.0316997	1.59311e-41	0.0295161	0.72015	0.040986	3.48018e-40	4	19484963	19485710	19485300	717
ENSACAG00000004115	0.0528431	0.594069	0.0889512	8.99571e-13	0.0574063	0.617677	0.0929391	7.23017e-13	0.0616807	0.471687	0.130766	2.28728e-09	4	19508471	19516722	19512600	312
ENSACAG00000004118	0.174989	0.460876	0.379689	4.23666e-17	0.201697	0.552455	0.365092	7.11579e-20	0.20542	0.480123	0.427849	3.92644e-14	4	59114620	59142860	59128740	1881
ENSACAG00000004120	0.0383063	0.722042	0.0530528	2.60279e-68	0.03853	0.843486	0.0456794	2.11298e-78	0.0321055	0.70772	0.0453647	8.82693e-71	1	42632107	42633517	42632812	1326
ENSACAG00000004123	0.029218	1.19287	0.0244939	3.98317e-16	0.0440723	1.18547	0.037177	3.67302e-15	0.0756248	1.10368	0.0685208	3.78032e-12	Un0032	1768358	1768574	1768466	213
ENSACAG00000004124	0.0665894	0.701873	0.0948739	9.50042e-29	0.0620581	0.663089	0.0935893	5.71695e-28	0.0807149	0.652522	0.123697	2.30282e-24	Un0032	1312801	1365502	1339150	660
ENSACAG00000004125	0.0148196	0.908709	0.0163084	7.17634e-39	0.0123356	0.819535	0.0150519	4.11759e-37	0.0173198	0.769428	0.02251	1.32205e-33	Un0032	2086997	2169931	2128464	519
ENSACAG00000004128	0.0378977	0.833941	0.0454441	1.80712e-18	0.0377977	0.803754	0.0470265	6.98081e-18	0.0450374	0.749894	0.0600584	1.28812e-16	Un0016	953473	1096536	1025000	288
ENSACAG00000004129	0.0131213	0.62985	0.0208323	1.3374e-17	0.0175332	0.59664	0.0293866	5.07712e-16	0.0087351	0.70043	0.0124711	3.97733e-20	Un0032	33414	54939	44176.5	294
ENSACAG00000004130	0.0673828	0.319643	0.210806	0.00898975	0.0673535	0.514537	0.130901	0.000218109	0.0789179	0.451039	0.174969	0.00143059	Un0352	268747	295200	281974	120
ENSACAG00000004133	0.118879	0.710471	0.167325	2.23393e-79	0.158837	0.847598	0.187397	1.06357e-77	0.124379	0.781915	0.159069	4.57486e-86	1	84445432	84474094	84459763	2913
[truncated: 7,555 more rows]
